# Supplementary material for: SSCS: A Stage Supervised Subtyping System for Colorectal Cancer
Source: MDPI journal article supplement (doi:10.3390/biomedicines9121815), 2021-12-02

a

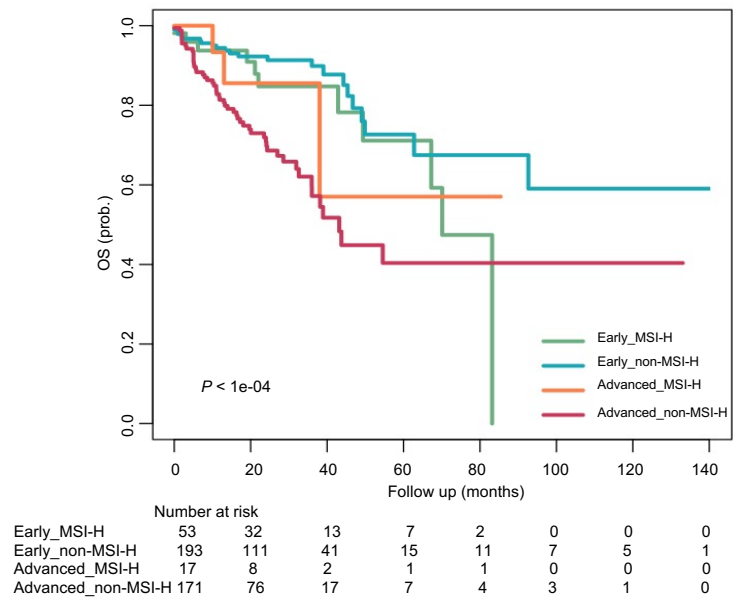

b

|                    | Early_MSI-H | Early_non-MSI-H      | Advanced_MSI-H |
|--------------------|-------------|----------------------|----------------|
| Early_non-MSI-H    | 0.33        | -                    | -              |
| Advanced_MSI-H     | 0.92        | 0.40                 | -              |
| Advanced_non-MSI-H | 0.11        | $9.5 \times 10^{-7}$ | 0.33           |

c

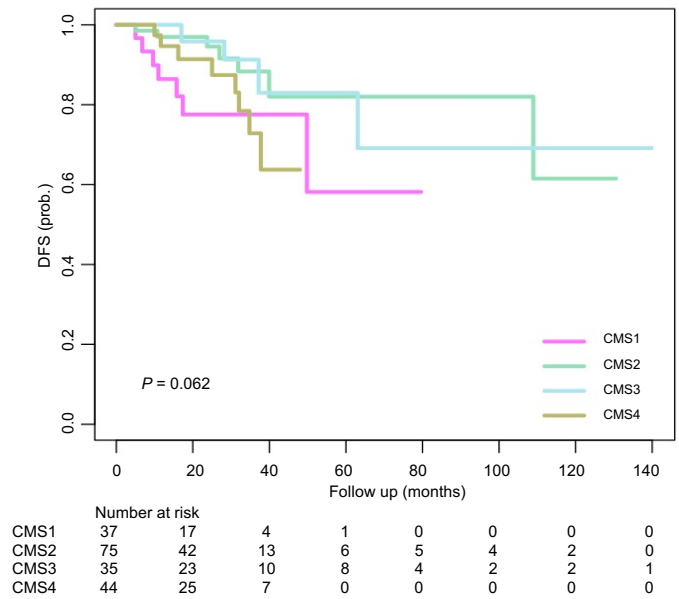

d

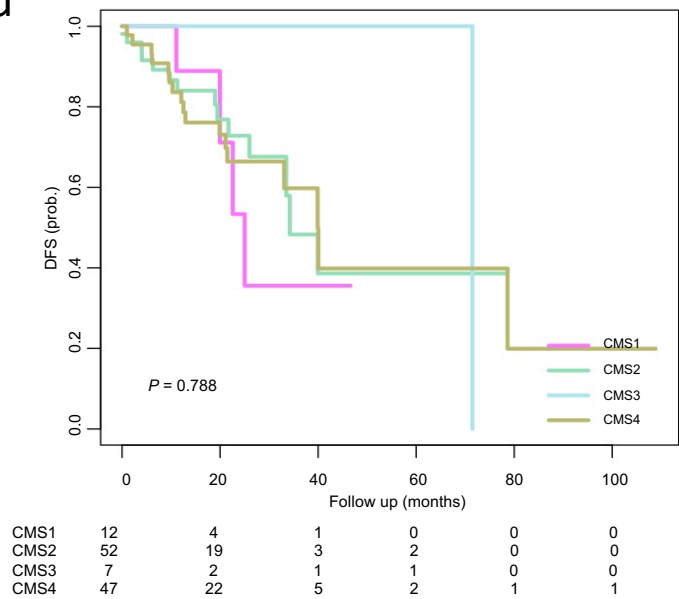

e

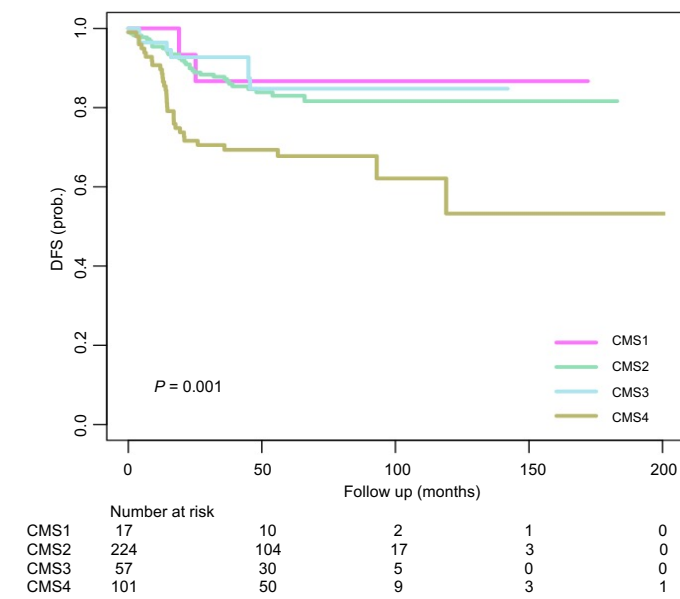

f

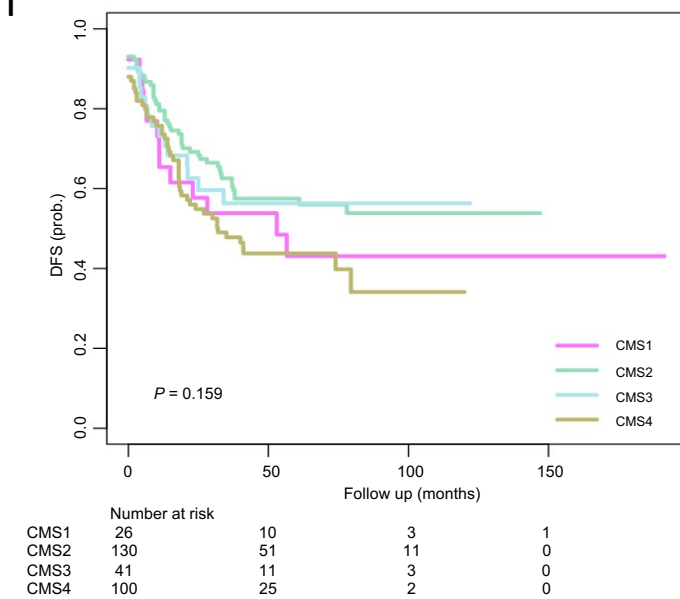

Supplement: s1 [file s1]
