# Supplementary material for: SSCS: A Stage Supervised Subtyping System for Colorectal Cancer
Source: MDPI journal article supplement (doi:10.3390/biomedicines9121815), 2021-12-02
Supplement: s1 [file s1]

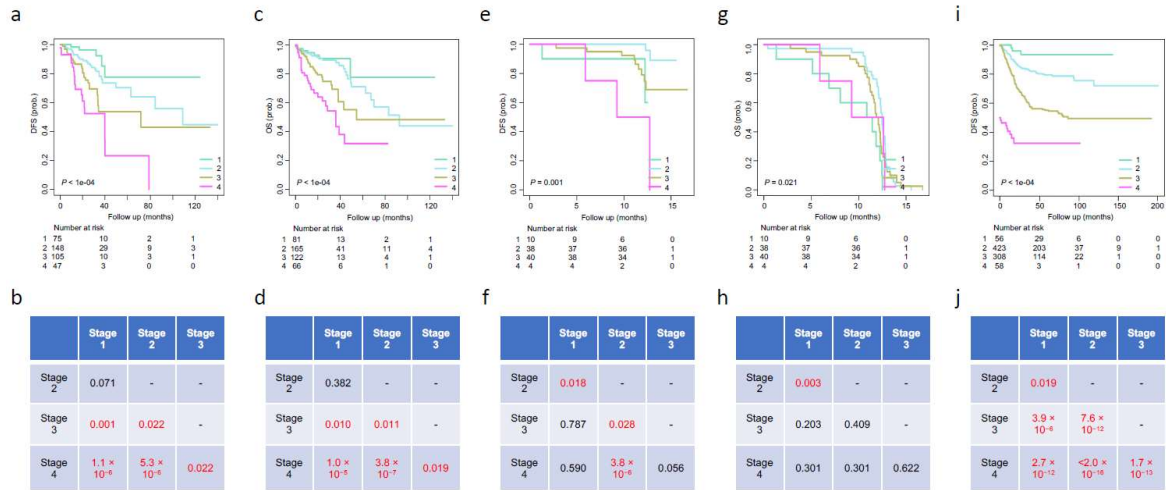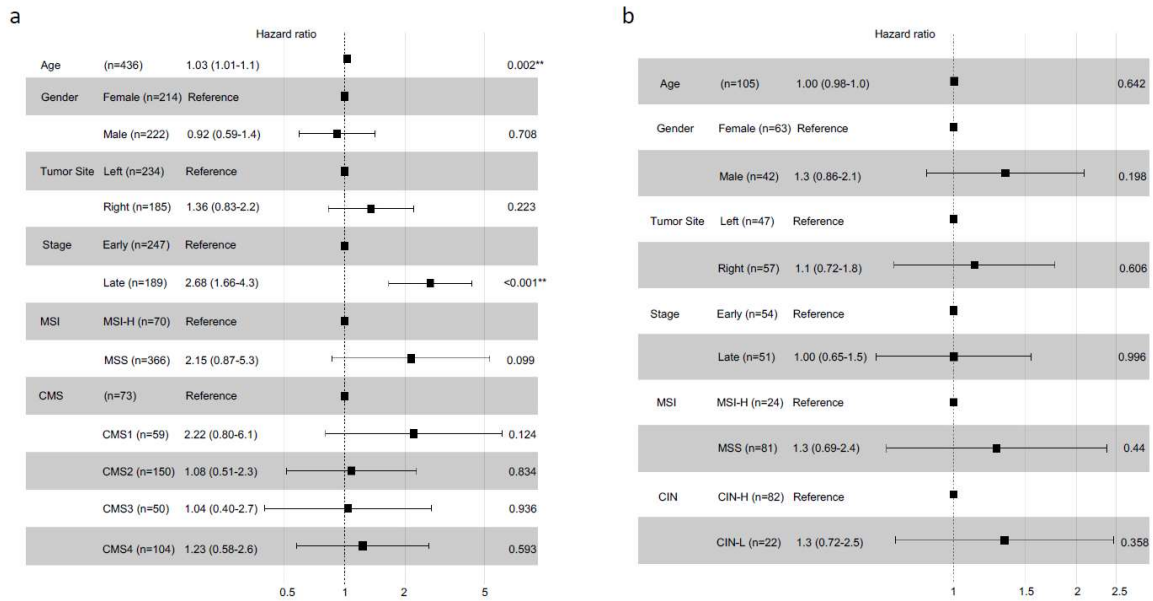

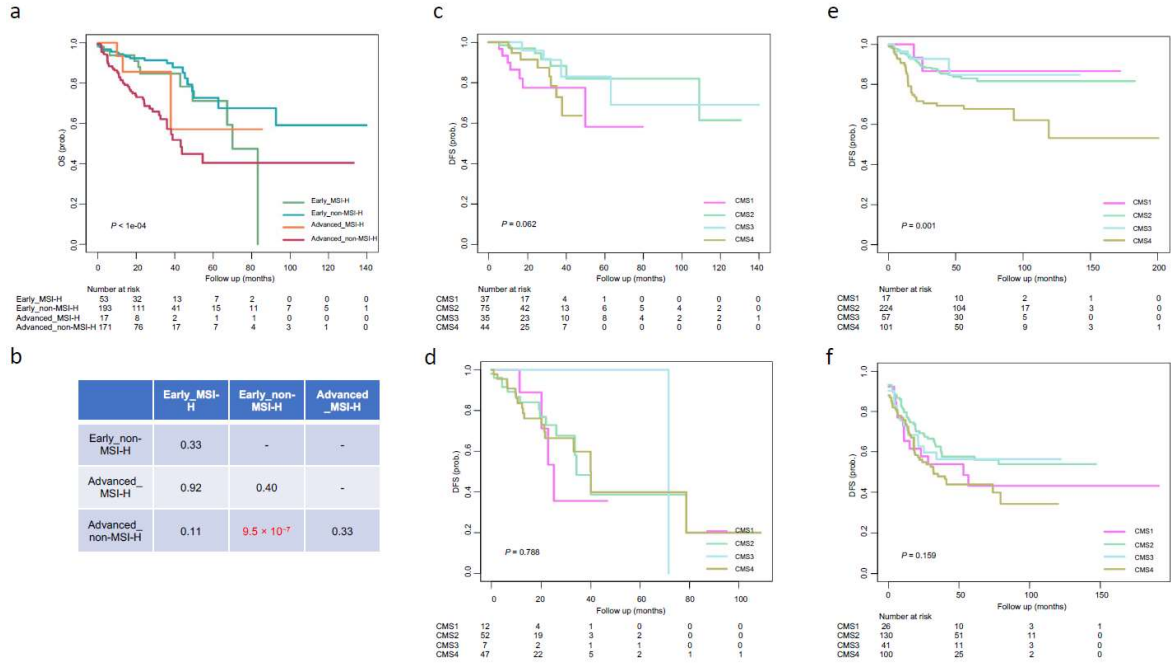

**Figure S3. Kaplan-Meier survival curves for the Stage\_MSI and Stage\_CMS systems.** (a). Kaplan-Meier survival curve comparing OS of the four groups (Early\_MSI-H, Early\_non-MSI-H, Advanced\_MSI-H, and Advanced\_non-MSI-H) in the TCGA cohort. The indicated p-value was calculated with the log-rank test. (b). Summary table of the pairwise comparisons of survival curves between the four groups. Survival difference was tested using the log-rank test, with FDR adjusted p-values less than 0.05 were considered statistically significant and displayed in red color. Kaplan-Meier survival curves comparing DFS of the four CMS subtypes (CMS1-4) in the TCGA\_early (c), TCGA\_advanced (d), GEO\_early (e), and GEO\_advanced (f) cases. The indicated p-values were calculated with the log-rank tests.

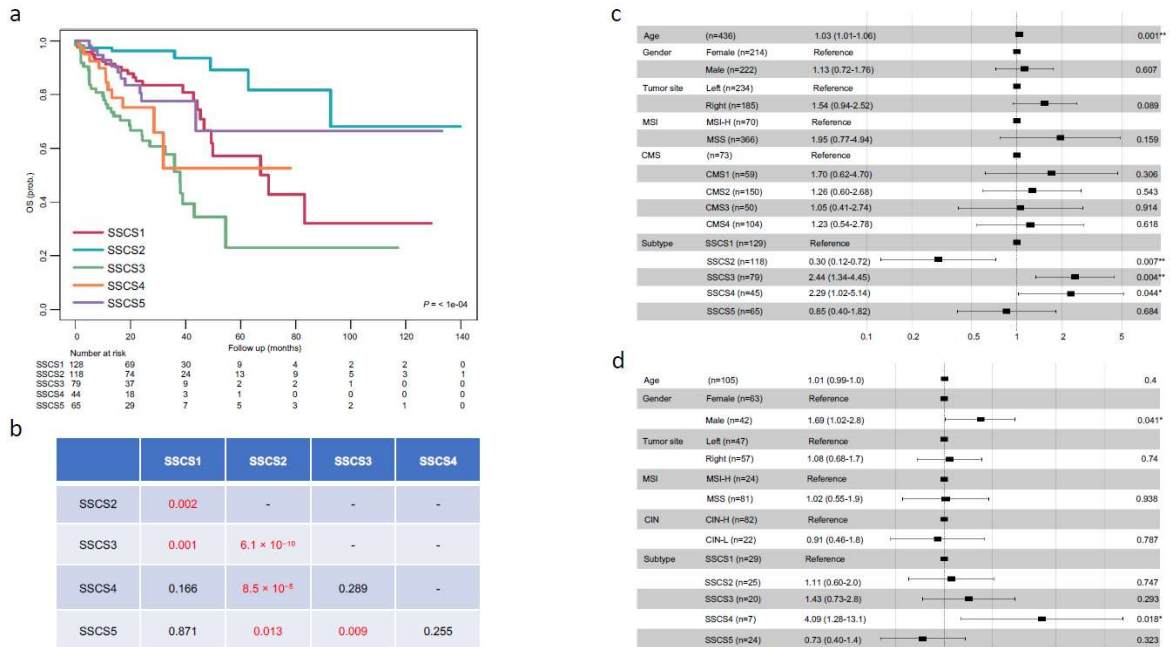

**Figure S4. Kaplan-Meier survival curves and multivariate COX PH forest plots for OS.** (a). Kaplan-Meier survival curve comparing OS of the five SSCS subtypes in the TCGA cohort. The indicated p-value was calculated with the log-rank test. (b). Summary table of the pairwise comparisons of survival curves between the five SSCS subtypes in the TCGA cohort. Survival differences were tested using the log-rank tests, with FDR adjusted p-values less than 0.05 were considered statistically

significant and displayed in red colors. Forest plots of Cox PH regression models illustrated the HRs, 95% CIs and log-rank p-values for different subtyping systems (SSCS, MSI, CMS, etc.) and confounder factors (age, gender, etc.) for OS in the TCGA (c) and CPTAC (d) cohorts. Log-rank p-value significance levels were given by stars: \* < 0.05, and \*\* < 0.01.

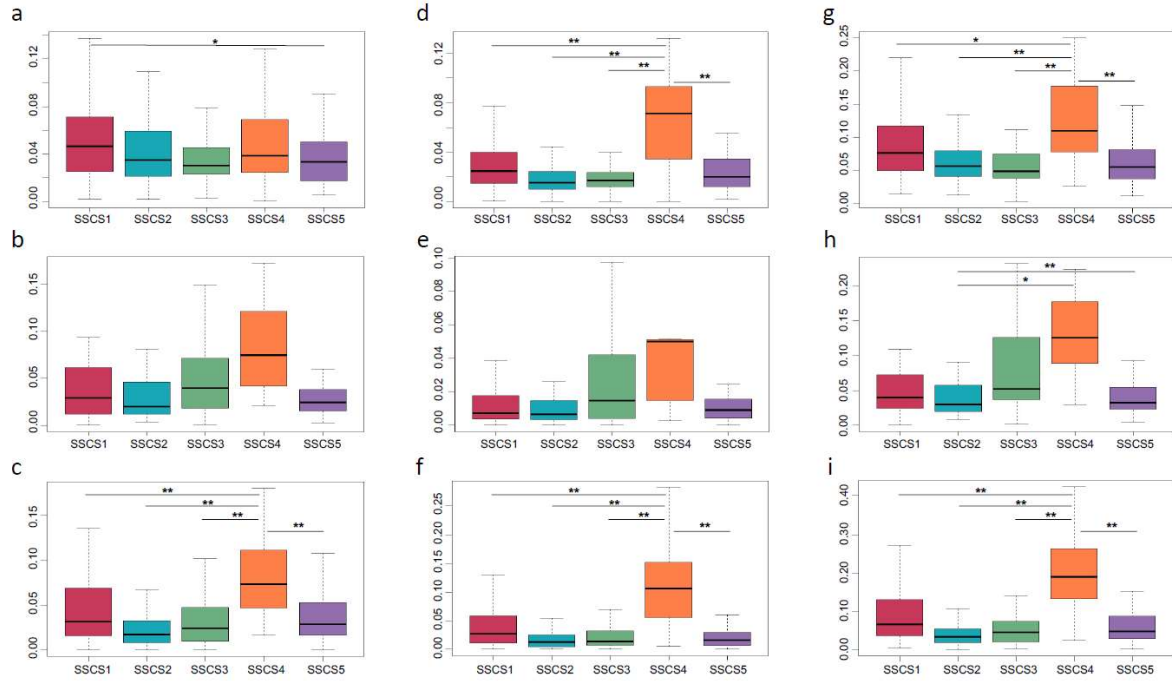

**Figure S5.** Boxplots of the immune, stroma, and microenvironment scores across the five SSCS subtypes. Boxplots of the immune (a-c), stroma (d-f), and microenvironment (g-i) scores across the five SSCS subtypes. Patient cohorts include TCGA (a, d, g), CPTAC (b, e, h), and GEO (c, f, i). Pairwise Wilcoxon rank sum tests with FDR adjusted p-value < 0.05 were considered statistically significant, and marked with a star. Two stars represent FDR adjusted p-value < 0.01.
