# Supplementary material for: SSCS: A Stage Supervised Subtyping System for Colorectal Cancer
Source: MDPI journal article supplement (doi:10.3390/biomedicines9121815), 2021-12-02
Supplement: s1 [file s1]

a

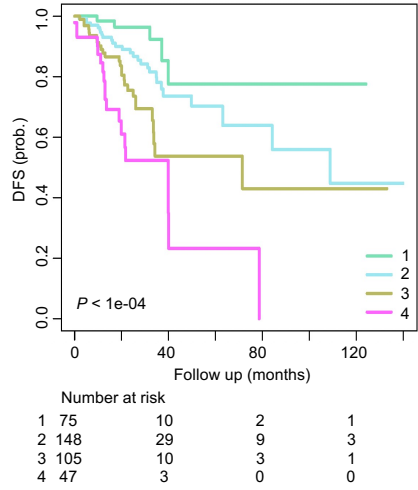

c

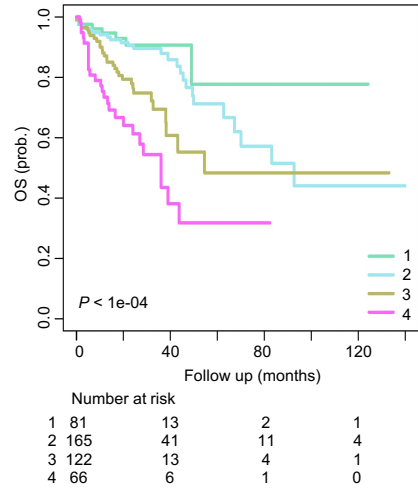

e

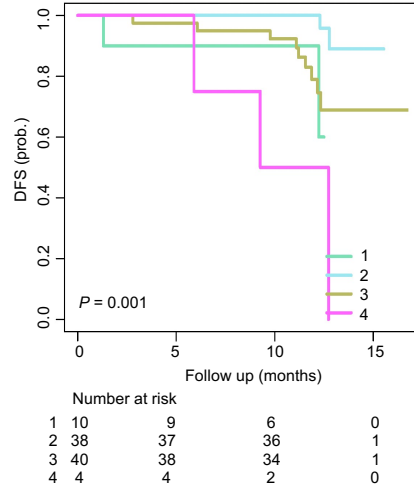

g

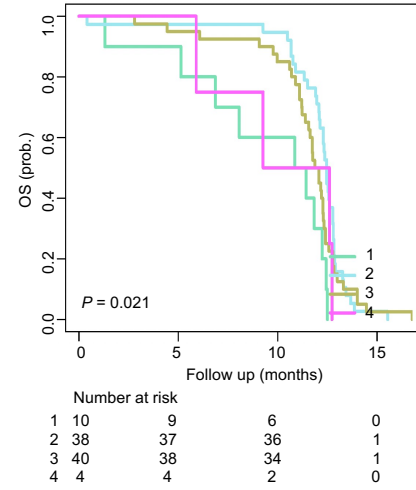

i

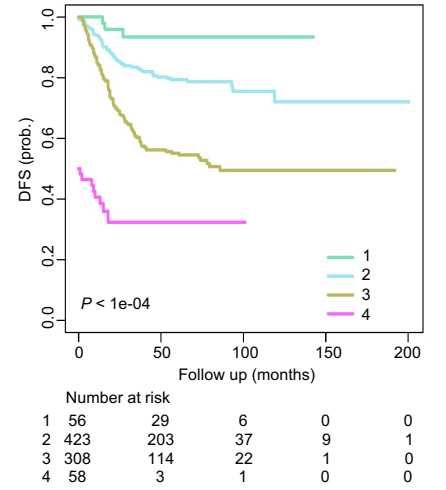

b

|         | Stage 1              | Stage 2              | Stage 3 |
|---------|----------------------|----------------------|---------|
| Stage 2 | 0.071                | -                    | -       |
| Stage 3 | 0.001                | 0.022                | -       |
| Stage 4 | $1.1 \times 10^{-6}$ | $5.3 \times 10^{-6}$ | 0.022   |

d

|         | Stage 1              | Stage 2              | Stage 3 |
|---------|----------------------|----------------------|---------|
| Stage 2 | 0.382                | -                    | -       |
| Stage 3 | 0.010                | 0.011                | -       |
| Stage 4 | $1.0 \times 10^{-5}$ | $3.8 \times 10^{-7}$ | 0.019   |

f

|         | Stage 1 | Stage 2              | Stage 3 |
|---------|---------|----------------------|---------|
| Stage 2 | 0.018   | -                    | -       |
| Stage 3 | 0.787   | 0.028                | -       |
| Stage 4 | 0.590   | $3.8 \times 10^{-6}$ | 0.056   |

h

|         | Stage 1 | Stage 2 | Stage 3 |
|---------|---------|---------|---------|
| Stage 2 | 0.003   | -       | -       |
| Stage 3 | 0.203   | 0.409   | -       |
| Stage 4 | 0.301   | 0.301   | 0.622   |

j

|         | Stage 1               | Stage 2                | Stage 3               |
|---------|-----------------------|------------------------|-----------------------|
| Stage 2 | 0.019                 | -                      | -                     |
| Stage 3 | $3.9 \times 10^{-6}$  | $7.6 \times 10^{-12}$  | -                     |
| Stage 4 | $2.7 \times 10^{-12}$ | $<2.0 \times 10^{-16}$ | $1.7 \times 10^{-13}$ |
