# Supplementary material for: SSCS: A Stage Supervised Subtyping System for Colorectal Cancer
Source: Biomedicines. 2021 Dec 2;9(12):1815. doi: 10.3390/biomedicines9121815 (PMC8698601; doi:10.3390/biomedicines9121815)
Supplement: Supplementary file 1 [file biomedicines-09-01815-s001.zip]

Archive with 13 entries (13 files):
- biomedicines-1439819 supplementary.pdf
- Figure S1_final.pdf
- Figure S2_final.pdf
- Figure S3_final.pdf
- Figure S4_final.pdf
- Figure S5_final.pdf
- TableS1.xlsx
- TableS2.xlsx
- TableS3.xlsx
- TableS4.xlsx
- TableS5.xlsx
- TableS6.xlsx
- TableS7.xlsx
