# Supplementary material for: SSCS: A Stage Supervised Subtyping System for Colorectal Cancer
Source: Biomedicines. 2021 Dec 2;9(12):1815. doi: 10.3390/biomedicines9121815 (PMC8698601; doi:10.3390/biomedicines9121815)
Supplement: Supplementary file 1 [file biomedicines-09-01815-s001.zip › TableS1.xlsx]

## Sheet: TableS1
Table S1. 92 dysregulated gene sets between advanced- and early-stage of CRC identified from the three cohorts
Gene set	TCGA	CPTAC	GEO
GO_UBIQUINONE_METABOLIC_PROCESS	-5.66133	-1.56485	-4.70731
REACTOME_G1_S_SPECIFIC_TRANSCRIPTION	-5.40577	-6.38896	-6.90776
BIOCARTA_MITOCHONDRIA_PATHWAY	-5.4037	-4.78595	-6.50804
BIOCARTA_D4GDI_PATHWAY	-5.15751	-1.66389	-4.36734
LY_AGING_MIDDLE_DN	-4.41919	-4.12956	-6.90776
TURJANSKI_MAPK1_AND_MAPK2_TARGETS	-4.10209	0	-3.46069
REACTOME_CITRIC_ACID_CYCLE_TCA_CYCLE_	-4.01389	-2.91189	-6.90776
BIOCARTA_SET_PATHWAY	-3.94796	-0.259613	-3.57687
LI_WILMS_TUMOR_ANAPLASTIC_UP	-3.72124	-2.78846	-6.90776
REACTOME_UNWINDING_OF_DNA	-3.71921	-3.95603	-3.57263
SCIAN_CELL_CYCLE_TARGETS_OF_TP53_AND_TP73_DN	-3.65757	-3.96622	-6.90776
MOOTHA_FFA_OXYDATION	-3.52976	-1.63112	-6.90776
WP_MITOCHONDRIAL_CIII_ASSEMBLY	-3.32905	-4.2303	-4.35995
IGLESIAS_E2F_TARGETS_DN	-3.17121	-1.26571	-5.68616
BIOCARTA_RB_PATHWAY	-3.13946	-0.654619	-4.53341
REACTOME_TP53_REGULATES_TRANSCRIPTION_OF_CASPASE_ACTIVATORS_AND_CASPASES	-3.10307	-0.551682	-4.27723
MONTERO_THYROID_CANCER_POOR_SURVIVAL_UP	-2.94609	-1.94947	-4.66556
REACTOME_POLO_LIKE_KINASE_MEDIATED_EVENTS	-2.93818	-0.518438	-5.65
GO_TRICARBOXYLIC_ACID_METABOLIC_PROCESS	-2.87003	-0.44001	-3.62294
GO_NUCLEOID	-2.84686	-0.763291	-6.90776
BIOCARTA_NPC_PATHWAY	-2.80983	0	-4.29248
GO_DNA_STRAND_ELONGATION_INVOLVED_IN_DNA_REPLICATION	-2.68616	-6.83888	-4.21726
BIOCARTA_DNAFRAGMENT_PATHWAY	-2.67469	-2.93769	-4.2799
GO_SMN_SM_PROTEIN_COMPLEX	-2.6721	-1.70018	-3.55554
WP_TCA_CYCLE_AKA_KREBS_OR_CITRIC_ACID_CYCLE	-2.55789	-2.15365	-6.58104
WIKMAN_ASBESTOS_LUNG_CANCER_UP	-2.55766	0.270012	-6.74683
WP_UREA_CYCLE_AND_ASSOCIATED_PATHWAYS	-2.55056	-3.23635	-6.90776
GO_COENZYME_A_BIOSYNTHETIC_PROCESS	-2.52088	-0.754002	-4.19531
REACTOME_CHK1_CHK2_CDS1_MEDIATED_INACTIVATION_OF_CYCLIN_B_CDK1_COMPLEX	-2.27975	-2.9451	-3.8506
COLLER_MYC_TARGETS_UP	-2.22193	-2.15909	-6.90776
GO_NUCLEOBASE_BIOSYNTHETIC_PROCESS	-2.11205	-0.64825	-4.67927
REACTOME_CONDENSATION_OF_PROMETAPHASE_CHROMOSOMES	-2.07306	-0.866549	-3.64013
KEGG_ASCORBATE_AND_ALDARATE_METABOLISM	-2.03692	0.288789	-4.30997
BIOCARTA_RANMS_PATHWAY	-2.02852	-2.79351	-4.72092
WP_METABOLIC_REPROGRAMMING_IN_COLON_CANCER	-1.95017	-1.81905	-6.90776
MOOTHA_TCA	-1.86666	-1.7536	-5.71041
GO_COENZYME_A_METABOLIC_PROCESS	-1.72154	-0.921831	-4.63125
REACTOME_TP53_REGULATES_TRANSCRIPTION_OF_GENES_INVOLVED_IN_G1_CELL_CYCLE_ARREST	-1.69418	-0.465996	-5.38209
GO_MITOCHONDRIAL_DNA_METABOLIC_PROCESS	-1.66723	-2.74808	-3.51174
LE_NEURONAL_DIFFERENTIATION_DN	-1.49219	-3.13532	-6.90776
GO_MICROBODY_LUMEN	-1.4746	-3.07827	-6.90776
BIOCARTA_PTC1_PATHWAY	-1.32227	0	-3.73836
GO_PURINE_NUCLEOBASE_BIOSYNTHETIC_PROCESS	-1.31916	-1.13541	-3.47933
WP_SULFATION_BIOTRANSFORMATION_REACTION	-1.28143	-6.90776	-3.92927
REACTOME_PEROXISOMAL_LIPID_METABOLISM	-1.25026	-0.192748	-6.90776
KEGG_CITRATE_CYCLE_TCA_CYCLE	-1.24271	-4.30403	-6.90776
REACTOME_CRISTAE_FORMATION	-1.20411	-2.5088	-6.90776
KEGG_FATTY_ACID_METABOLISM	-1.12695	-0.993577	-6.90776
REACTOME_TP53_REGULATES_TRANSCRIPTION_OF_GENES_INVOLVED_IN_G2_CELL_CYCLE_ARREST	-1.00863	-0.260028	-6.90776
GO_SAM_COMPLEX	-0.920801	-1.49081	-3.92207
GO_NEGATIVE_REGULATION_OF_EPIDERMIS_DEVELOPMENT	-0.90409	-0.314711	-5.2795
GO_NUCLEOSIDE_MONOPHOSPHATE_PHOSPHORYLATION	-0.835079	-1.00581	-3.70851
GO_URONIC_ACID_METABOLIC_PROCESS	-0.815993	-0.0216425	-3.61809
GO_CRISTAE_FORMATION	-0.806629	-1.45372	-6.90776
GO_RESPONSE_TO_ETHER	-0.381246	-0.370209	-3.44055
SEMBA_FHIT_TARGETS_UP	-0.366004	3.09701	5.11227
TONKS_TARGETS_OF_RUNX1_RUNX1T1_FUSION_GRANULOCYTE_DN	-0.365197	6.90776	6.72944
GO_SULFURTRANSFERASE_ACTIVITY	-0.34705	-2.45398	-3.9668
GO_NUCLEOSIDE_TRIPHOSPHATE_DIPHOSPHATASE_ACTIVITY	-0.0713671	-2.59343	-3.06706
DAVICIONI_RHABDOMYOSARCOMA_PAX_FOXO1_FUSION_DN	0.299282	4.99943	5.66383
CASTELLANO_NRAS_TARGETS_DN	3.5496	5.86758	6.19167
NADERI_BREAST_CANCER_PROGNOSIS_DN	1.08102	6.38866	6.90776
BERENJENO_TRANSFORMED_BY_RHOA_FOREVER_UP	2.73735	5.06797	6.90776
CHANG_POU5F1_TARGETS_UP	1.13435	6.90776	6.74241
DASU_IL6_SIGNALING_SCAR_DN	0.898353	5.3277	6.90776
VERRECCHIA_RESPONSE_TO_TGFB1_C3	0.89639	3.49526	5.7328
HINATA_NFKB_TARGETS_KERATINOCYTE_DN	1.94498	5.07388	6.90776
YIH_RESPONSE_TO_ARSENITE_C5	1.80838	5.45764	5.88884
ONGUSAHA_BRCA1_TARGETS_UP	2.04647	5.10935	5.89155
KANG_AR_TARGETS_DN	3.42433	4.66303	6.90776
ZHU_SKIL_TARGETS_UP	1.73477	1.86666	6.90776
PID_INTEGRIN5_PATHWAY	0.0448196	4.1626	6.90776
REACTOME_DEGRADATION_OF_CYSTEINE_AND_HOMOCYSTEINE	0.00676282	-3.83682	-6.16639
WP_CHOLESTEROL_BIOSYNTHESIS_PATHWAY	0.0349435	-6.90776	-4.88589
GO_PEPTIDYL_METHIONINE_MODIFICATION	0.0473222	-0.752918	-3.24776
GO_PENTOSE_METABOLIC_PROCESS	0	-1.49415	-3.90893
GO_FATTY_ACID_BETA_OXIDATION_USING_ACYL_COA_OXIDASE	0.127936	0	-5.32267
GO_SHORT_CHAIN_FATTY_ACID_METABOLIC_PROCESS	0.437622	-1.79625	-4.71205
GO_NEGATIVE_REGULATION_OF_EXTRACELLULAR_MATRIX_ORGANIZATION	1.8524	3.55715	5.32495
GO_POSITIVE_REGULATION_OF_ANION_TRANSMEMBRANE_TRANSPORT	0.157695	0	-3.60333
GO_PLATELET_ALPHA_GRANULE_MEMBRANE	1.18695	6.51477	6.90776
GO_VASCULAR_ENDOTHELIAL_GROWTH_FACTOR_RECEPTOR_BINDING	2.97036	3.06985	6.47825
GO_MUSCLE_ALPHA_ACTININ_BINDING	2.51841	6.02639	6.90776
HP_UNERUPTED_TOOTH	1.15021	4.79508	5.30174
HP_POOR_WOUND_HEALING	1.2639	6.4975	6.90776
HP_ABNORMALITY_OF_FRONTAL_SINUS	1.02326	3.58225	5.33057
HP_HYPERGLYCINURIA	0.915166	0.278868	-3.57723
HP_PROTRUSIO_ACETABULI	2.22036	4.92695	4.64708
HP_ASCENDING_TUBULAR_AORTA_ANEURYSM	1.54356	6.8476	6.90776
HP_ABNORMAL_PERISTALSIS	3.09471	5.97217	6.90776
HP_GENERALIZED_OSTEOPOROSIS	1.44058	4.73966	6.51903
HP_OSTEOLYSIS_INVOLVING_BONES_OF_THE_UPPER_LIMBS	0.779948	4.68734	6.90776
