# Supplementary material for: SSCS: A Stage Supervised Subtyping System for Colorectal Cancer
Source: Biomedicines. 2021 Dec 2;9(12):1815. doi: 10.3390/biomedicines9121815 (PMC8698601; doi:10.3390/biomedicines9121815)
Supplement: Supplementary file 1 [file biomedicines-09-01815-s001.zip › TableS2.xlsx]

## Sheet: TableS2
Table S2. 537 dysregulated gene sets between MSI-H and non-MSI-H cases identified from the TCGA and CPTAC cohorts
Gene set	TCGA	CPTAC
WATANABE_COLON_CANCER_MSI_VS_MSS_DN	-6.90776	-6.90776
LAIHO_COLORECTAL_CANCER_SERRATED_DN	-6.90776	-4.49488
NIKOLSKY_BREAST_CANCER_20Q11_AMPLICON	-6.90776	-6.90776
NIKOLSKY_BREAST_CANCER_20Q12_Q13_AMPLICON	-6.90776	-6.90776
SUMI_HNF4A_TARGETS	-6.90776	-4.29989
BLANCO_MELO_HUMAN_PARAINFLUENZA_VIRUS_3_INFECTION_A594_CELLS_UP	6.90776	6.90776
BLANCO_MELO_RESPIRATORY_SYNCYTIAL_VIRUS_INFECTION_A594_CELLS_UP	6.90776	6.90776
BLANCO_MELO_COVID19_SARS_COV_2_INFECTION_CALU3_CELLS_UP	6.90776	6.90776
BLANCO_MELO_COVID19_BRONCHIAL_EPITHELIAL_CELLS_SARS_COV_2_INFECTION_UP	6.90776	6.90776
BLANCO_MELO_BETA_INTERFERON_TREATED_BRONCHIAL_EPITHELIAL_CELLS_UP	6.90776	6.90776
BLANCO_MELO_COVID19_SARS_COV_2_POS_PATIENT_LUNG_TISSUE_UP	6.90776	6.90776
BERTUCCI_MEDULLARY_VS_DUCTAL_BREAST_CANCER_UP	6.90776	6.90776
SCHUETZ_BREAST_CANCER_DUCTAL_INVASIVE_UP	6.90776	3.89945
SENGUPTA_NASOPHARYNGEAL_CARCINOMA_UP	6.90776	6.90776
WATANABE_COLON_CANCER_MSI_VS_MSS_UP	6.90776	6.90776
FULCHER_INFLAMMATORY_RESPONSE_LECTIN_VS_LPS_DN	6.90776	6.90776
DEURIG_T_CELL_PROLYMPHOCYTIC_LEUKEMIA_DN	6.90776	6.90776
LAIHO_COLORECTAL_CANCER_SERRATED_UP	6.90776	6.90776
GAL_LEUKEMIC_STEM_CELL_DN	6.90776	6.90776
TONKS_TARGETS_OF_RUNX1_RUNX1T1_FUSION_HSC_DN	6.90776	3.19043
PAPASPYRIDONOS_UNSTABLE_ATEROSCLEROTIC_PLAQUE_UP	6.90776	6.90776
JAATINEN_HEMATOPOIETIC_STEM_CELL_DN	6.90776	6.90776
GRAHAM_CML_QUIESCENT_VS_NORMAL_DIVIDING_UP	6.90776	6.90776
GRAHAM_NORMAL_QUIESCENT_VS_NORMAL_DIVIDING_UP	6.90776	3.4782
GRAHAM_NORMAL_QUIESCENT_VS_NORMAL_DIVIDING_DN	6.90776	6.90776
WATANABE_ULCERATIVE_COLITIS_WITH_CANCER_DN	6.90776	6.90776
KOINUMA_COLON_CANCER_MSI_UP	6.90776	6.90776
MARKEY_RB1_ACUTE_LOF_DN	6.90776	6.90776
DUTTA_APOPTOSIS_VIA_NFKB	6.90776	5.28568
HUMMERICH_SKIN_CANCER_PROGRESSION_UP	6.90776	6.90776
FARMER_BREAST_CANCER_CLUSTER_1	6.90776	6.90776
BOWIE_RESPONSE_TO_EXTRACELLULAR_MATRIX	6.90776	6.90776
BOWIE_RESPONSE_TO_TAMOXIFEN	6.90776	6.90776
EINAV_INTERFERON_SIGNATURE_IN_CANCER	6.90776	6.90776
DAUER_STAT3_TARGETS_DN	6.90776	6.90776
YAN_ESCAPE_FROM_ANOIKIS	6.90776	6.90776
RICKMAN_METASTASIS_DN	6.90776	6.90776
SHIN_B_CELL_LYMPHOMA_CLUSTER_3	6.90776	4.15671
ZHANG_RESPONSE_TO_IKK_INHIBITOR_AND_TNF_UP	6.90776	6.90776
MORI_LARGE_PRE_BII_LYMPHOCYTE_DN	6.90776	3.19248
MORI_IMMATURE_B_LYMPHOCYTE_UP	6.90776	5.27484
MORI_IMMATURE_B_LYMPHOCYTE_DN	6.90776	6.90776
DER_IFN_ALPHA_RESPONSE_UP	6.90776	6.90776
RADAEVA_RESPONSE_TO_IFNA1_UP	6.90776	6.90776
FLECHNER_BIOPSY_KIDNEY_TRANSPLANT_REJECTED_VS_OK_UP	6.90776	6.90776
WIELAND_UP_BY_HBV_INFECTION	6.90776	6.90776
DER_IFN_BETA_RESPONSE_UP	6.90776	6.90776
SANA_RESPONSE_TO_IFNG_UP	6.90776	6.90776
SANA_TNF_SIGNALING_UP	6.90776	6.90776
LU_IL4_SIGNALING	6.90776	3.90207
DER_IFN_GAMMA_RESPONSE_UP	6.90776	6.90776
GALINDO_IMMUNE_RESPONSE_TO_ENTEROTOXIN	6.90776	6.90776
NEMETH_INFLAMMATORY_RESPONSE_LPS_UP	6.90776	6.90776
HESS_TARGETS_OF_HOXA9_AND_MEIS1_DN	6.90776	5.73073
LENAOUR_DENDRITIC_CELL_MATURATION_DN	6.90776	6.90776
VERHAAK_AML_WITH_NPM1_MUTATED_UP	6.90776	6.90776
BENNETT_SYSTEMIC_LUPUS_ERYTHEMATOSUS	6.90776	6.90776
BASSO_CD40_SIGNALING_UP	6.90776	6.90776
LIANG_SILENCED_BY_METHYLATION_2	6.90776	6.90776
LIAN_LIPA_TARGETS_6M	6.90776	6.63613
BROWNE_INTERFERON_RESPONSIVE_GENES	6.90776	6.90776
KRASNOSELSKAYA_ILF3_TARGETS_UP	6.90776	6.90776
KANG_DOXORUBICIN_RESISTANCE_UP	6.90776	6.90776
BURTON_ADIPOGENESIS_3	6.90776	6.90776
LIAN_LIPA_TARGETS_3M	6.90776	6.90776
ZHU_CMV_ALL_UP	6.90776	6.90776
ZHENG_RESPONSE_TO_ARSENITE_UP	6.90776	6.90776
RODWELL_AGING_KIDNEY_UP	6.90776	5.54179
GEISS_RESPONSE_TO_DSRNA_UP	6.90776	6.90776
ZHU_CMV_8_HR_UP	6.90776	6.90776
MCLACHLAN_DENTAL_CARIES_UP	6.90776	6.90776
BILD_HRAS_ONCOGENIC_SIGNATURE	6.90776	4.31243
KIM_LRRC3B_TARGETS	6.90776	6.90776
GAVIN_PDE3B_TARGETS	6.90776	4.53592
HELLER_SILENCED_BY_METHYLATION_UP	6.90776	6.90776
WALLACE_PROSTATE_CANCER_RACE_UP	6.90776	6.90776
SARRIO_EPITHELIAL_MESENCHYMAL_TRANSITION_UP	6.90776	6.90776
WORSCHECH_TUMOR_REJECTION_UP	6.90776	6.90776
MOSERLE_IFNA_RESPONSE	6.90776	6.90776
GAURNIER_PSMD4_TARGETS	6.90776	6.90776
WILENSKY_RESPONSE_TO_DARAPLADIB	6.90776	6.90776
QI_PLASMACYTOMA_UP	6.90776	6.90776
VILIMAS_NOTCH1_TARGETS_UP	6.90776	6.90776
VILIMAS_NOTCH1_TARGETS_DN	6.90776	6.90776
GOLDRATH_ANTIGEN_RESPONSE	6.90776	6.90776
ICHIBA_GRAFT_VERSUS_HOST_DISEASE_D7_UP	6.90776	6.90776
ICHIBA_GRAFT_VERSUS_HOST_DISEASE_35D_UP	6.90776	6.90776
LINDSTEDT_DENDRITIC_CELL_MATURATION_A	6.90776	6.90776
ZHANG_INTERFERON_RESPONSE	6.90776	6.90776
WUNDER_INFLAMMATORY_RESPONSE_AND_CHOLESTEROL_UP	6.90776	6.90776
RUTELLA_RESPONSE_TO_CSF2RB_AND_IL4_DN	6.90776	5.53045
RUTELLA_RESPONSE_TO_HGF_UP	6.90776	6.59821
RUTELLA_RESPONSE_TO_HGF_VS_CSF2RB_AND_IL4_UP	6.90776	6.56772
HINATA_NFKB_TARGETS_KERATINOCYTE_UP	6.90776	6.90776
POOLA_INVASIVE_BREAST_CANCER_UP	6.90776	6.90776
ONO_AML1_TARGETS_UP	6.90776	3.06652
ONO_FOXP3_TARGETS_DN	6.90776	6.56324
UROSEVIC_RESPONSE_TO_IMIQUIMOD	6.90776	6.90776
KUROZUMI_RESPONSE_TO_ONCOCYTIC_VIRUS	6.90776	6.03446
KOBAYASHI_EGFR_SIGNALING_24HR_DN	6.90776	6.90776
HOSHIDA_LIVER_CANCER_SUBCLASS_S1	6.90776	6.90776
ZHAN_MULTIPLE_MYELOMA_LB_DN	6.90776	6.90776
NAKAYAMA_SOFT_TISSUE_TUMORS_PCA1_UP	6.90776	6.90776
STAMBOLSKY_TARGETS_OF_MUTATED_TP53_DN	6.90776	6.00617
VERHAAK_GLIOBLASTOMA_MESENCHYMAL	6.90776	6.90776
BOSCO_TH1_CYTOTOXIC_MODULE	6.90776	6.90776
BOSCO_INTERFERON_INDUCED_ANTIVIRAL_MODULE	6.90776	6.90776
ALTEMEIER_RESPONSE_TO_LPS_WITH_MECHANICAL_VENTILATION	6.90776	6.90776
SMIRNOV_RESPONSE_TO_IR_6HR_DN	6.90776	6.90776
GHANDHI_DIRECT_IRRADIATION_UP	6.90776	6.90776
GHANDHI_BYSTANDER_IRRADIATION_UP	6.90776	6.90776
HECKER_IFNB1_TARGETS	6.90776	6.90776
FISCHER_G2_M_CELL_CYCLE	6.90776	6.90776
BIOCARTA_BLYMPHOCYTE_PATHWAY	6.90776	4.14965
BIOCARTA_CTL_PATHWAY	6.90776	6.55879
BIOCARTA_INFLAM_PATHWAY	6.90776	6.90776
BIOCARTA_TCRA_PATHWAY	6.90776	5.31055
BIOCARTA_NO2IL12_PATHWAY	6.90776	3.53571
BIOCARTA_NKT_PATHWAY	6.90776	4.14137
BIOCARTA_TCYTOTOXIC_PATHWAY	6.90776	5.85042
BIOCARTA_CTLA4_PATHWAY	6.90776	5.53802
BIOCARTA_MHC_PATHWAY	6.90776	6.90776
KEGG_ANTIGEN_PROCESSING_AND_PRESENTATION	6.90776	6.90776
KEGG_TOLL_LIKE_RECEPTOR_SIGNALING_PATHWAY	6.90776	6.90776
KEGG_HEMATOPOIETIC_CELL_LINEAGE	6.90776	6.90776
KEGG_NATURAL_KILLER_CELL_MEDIATED_CYTOTOXICITY	6.90776	4.47239
KEGG_INTESTINAL_IMMUNE_NETWORK_FOR_IGA_PRODUCTION	6.90776	6.90776
KEGG_TYPE_I_DIABETES_MELLITUS	6.90776	6.90776
KEGG_LEISHMANIA_INFECTION	6.90776	6.90776
KEGG_ASTHMA	6.90776	3.04192
KEGG_AUTOIMMUNE_THYROID_DISEASE	6.90776	6.90776
KEGG_SYSTEMIC_LUPUS_ERYTHEMATOSUS	6.90776	6.90776
KEGG_ALLOGRAFT_REJECTION	6.90776	6.90776
KEGG_GRAFT_VERSUS_HOST_DISEASE	6.90776	6.90776
PID_IL27_PATHWAY	6.90776	6.90776
PID_IL12_2PATHWAY	6.90776	6.90776
PID_IL23_PATHWAY	6.90776	6.90776
PID_IL12_STAT4_PATHWAY	6.90776	5.01377
REACTOME_ANTIGEN_PROCESSING_CROSS_PRESENTATION	6.90776	6.90776
REACTOME_IMMUNOREGULATORY_INTERACTIONS_BETWEEN_A_LYMPHOID_AND_A_NON_LYMPHOID_CELL	6.90776	6.90776
REACTOME_TCR_SIGNALING	6.90776	3.08157
REACTOME_CHEMOKINE_RECEPTORS_BIND_CHEMOKINES	6.90776	6.90776
REACTOME_COSTIMULATION_BY_THE_CD28_FAMILY	6.90776	6.90776
REACTOME_PD_1_SIGNALING	6.90776	6.90776
REACTOME_SIGNALING_BY_INTERLEUKINS	6.90776	6.90776
REACTOME_INTERLEUKIN_10_SIGNALING	6.90776	6.90776
REACTOME_INTERFERON_GAMMA_SIGNALING	6.90776	6.90776
REACTOME_INTERFERON_ALPHA_BETA_SIGNALING	6.90776	6.90776
REACTOME_INTERFERON_SIGNALING	6.90776	6.90776
WP_TYPE_II_INTERFERON_SIGNALING_IFNG	6.90776	6.90776
WP_ALLOGRAFT_REJECTION	6.90776	6.90776
WP_TOLLLIKE_RECEPTOR_SIGNALING_PATHWAY	6.90776	6.90776
WP_TYROBP_CAUSAL_NETWORK	6.90776	5.28928
WP_REGULATION_OF_TOLLLIKE_RECEPTOR_SIGNALING_PATHWAY	6.90776	6.90776
WP_MICROGLIA_PATHOGEN_PHAGOCYTOSIS_PATHWAY	6.90776	4.19551
WP_CYTOKINES_AND_INFLAMMATORY_RESPONSE	6.90776	4.44059
WP_THE_HUMAN_IMMUNE_RESPONSE_TO_TUBERCULOSIS	6.90776	6.90776
WP_INTERACTIONS_BETWEEN_IMMUNE_CELLS_AND_MICRORNAS_IN_TUMOR_MICROENVIRONMENT	6.90776	4.43754
WP_SELECTIVE_EXPRESSION_OF_CHEMOKINE_RECEPTORS_DURING_TCELL_POLARIZATION	6.90776	4.95758
WP_CYTOSOLIC_DNASENSING_PATHWAY	6.90776	6.90776
WP_PATHOGENESIS_OF_SARSCOV2_MEDIATED_BY_NSP9NSP10_COMPLEX	6.90776	6.61099
GO_POSITIVE_REGULATION_OF_CYTOKINE_PRODUCTION	6.90776	3.93606
GO_CELL_KILLING	6.90776	3.01953
GO_LEUKOCYTE_MEDIATED_CYTOTOXICITY	6.90776	5.68142
GO_NATURAL_KILLER_CELL_MEDIATED_IMMUNITY	6.90776	5.75327
GO_ADAPTIVE_IMMUNE_RESPONSE	6.90776	6.90776
GO_LEUKOCYTE_ACTIVATION_INVOLVED_IN_INFLAMMATORY_RESPONSE	6.90776	6.90776
GO_CYTOKINE_PRODUCTION_INVOLVED_IN_IMMUNE_RESPONSE	6.90776	6.90776
GO_T_CELL_CYTOKINE_PRODUCTION	6.90776	3.26168
GO_LYMPHOCYTE_MEDIATED_IMMUNITY	6.90776	6.90776
GO_ANTIGEN_PROCESSING_AND_PRESENTATION_OF_PEPTIDE_OR_POLYSACCHARIDE_ANTIGEN_VIA_MHC_CLASS_II	6.90776	3.51378
GO_REGULATION_OF_IMMUNE_EFFECTOR_PROCESS	6.90776	4.7019
GO_REGULATION_OF_LEUKOCYTE_MEDIATED_IMMUNITY	6.90776	3.39457
GO_REGULATION_OF_CYTOKINE_PRODUCTION_INVOLVED_IN_IMMUNE_RESPONSE	6.90776	6.90776
GO_POSITIVE_REGULATION_OF_CYTOKINE_PRODUCTION_INVOLVED_IN_IMMUNE_RESPONSE	6.90776	3.42209
GO_REGULATION_OF_RESPONSE_TO_BIOTIC_STIMULUS	6.90776	6.90776
GO_CELLULAR_DEFENSE_RESPONSE	6.90776	6.90776
GO_LEUKOCYTE_CELL_CELL_ADHESION	6.90776	3.45109
GO_RESPONSE_TO_VIRUS	6.90776	6.90776
GO_T_CELL_CHEMOTAXIS	6.90776	6.90776
GO_ANTIGEN_PROCESSING_AND_PRESENTATION	6.90776	6.90776
GO_INTERFERON_GAMMA_PRODUCTION	6.90776	6.90776
GO_INTERLEUKIN_1_BETA_PRODUCTION	6.90776	6.90776
GO_INTERLEUKIN_1_PRODUCTION	6.90776	6.90776
GO_INTERLEUKIN_2_PRODUCTION	6.90776	6.90776
GO_POSITIVE_REGULATION_OF_INTERFERON_GAMMA_PRODUCTION	6.90776	4.8038
GO_RESPONSE_TO_TYPE_I_INTERFERON	6.90776	6.90776
GO_RESPONSE_TO_INTERFERON_GAMMA	6.90776	6.90776
GO_RESPONSE_TO_INTERFERON_BETA	6.90776	6.90776
GO_CD4_POSITIVE_ALPHA_BETA_T_CELL_CYTOKINE_PRODUCTION	6.90776	3.4692
GO_MACROPHAGE_ACTIVATION	6.90776	6.90776
GO_ANTIGEN_PROCESSING_AND_PRESENTATION_OF_EXOGENOUS_PEPTIDE_ANTIGEN_VIA_MHC_CLASS_I	6.90776	6.90776
GO_REGULATORY_T_CELL_DIFFERENTIATION	6.90776	4.1644
GO_NEGATIVE_REGULATION_OF_VIRAL_GENOME_REPLICATION	6.90776	6.90776
GO_REGULATION_OF_INNATE_IMMUNE_RESPONSE	6.90776	4.62433
GO_ANTIGEN_PROCESSING_AND_PRESENTATION_OF_PEPTIDE_ANTIGEN	6.90776	6.90776
GO_DEFENSE_RESPONSE_TO_VIRUS	6.90776	6.90776
GO_INTERFERON_GAMMA_MEDIATED_SIGNALING_PATHWAY	6.90776	6.90776
GO_GLIAL_CELL_ACTIVATION	6.90776	6.90776
GO_CELLULAR_RESPONSE_TO_BIOTIC_STIMULUS	6.90776	6.90776
GO_CELLULAR_RESPONSE_TO_MOLECULE_OF_BACTERIAL_ORIGIN	6.90776	6.90776
GO_REGULATION_OF_MONOCYTE_CHEMOTAXIS	6.90776	6.90776
GO_POSITIVE_REGULATION_OF_MONOCYTE_CHEMOTAXIS	6.90776	6.90776
GO_NEGATIVE_REGULATION_OF_LEUKOCYTE_CELL_CELL_ADHESION	6.90776	3.33443
GO_NEGATIVE_REGULATION_OF_VIRAL_LIFE_CYCLE	6.90776	3.43958
GO_RESPONSE_TO_CHEMOKINE	6.90776	6.90776
GO_MHC_PROTEIN_COMPLEX	6.90776	6.90776
GO_MHC_CLASS_II_PROTEIN_COMPLEX	6.90776	6.90776
GO_TERTIARY_GRANULE_MEMBRANE	6.90776	6.90776
GO_LUMENAL_SIDE_OF_ENDOPLASMIC_RETICULUM_MEMBRANE	6.90776	3.40226
GO_ANTIGEN_BINDING	6.90776	6.90776
GO_MHC_PROTEIN_COMPLEX_BINDING	6.90776	6.90776
GO_MHC_PROTEIN_BINDING	6.90776	6.90776
GO_IMMUNE_RECEPTOR_ACTIVITY	6.90776	3.65618
HP_MENINGITIS	6.90776	5.64241
HP_RHEUMATOID_ARTHRITIS	6.90776	4.9625
HP_VASCULITIS	6.90776	4.13786
HP_ANTINUCLEAR_ANTIBODY_POSITIVITY	6.90776	4.98101
HP_ELEVATED_ERYTHROCYTE_SEDIMENTATION_RATE	6.90776	6.90776
HP_AUTOIMMUNE_ANTIBODY_POSITIVITY	6.90776	6.90776
TIAN_TNF_SIGNALING_VIA_NFKB	6.62453	4.12757
FOURNIER_ACINAR_DEVELOPMENT_LATE_2	6.61905	6.90776
TAKEDA_TARGETS_OF_NUP98_HOXA9_FUSION_3D_UP	6.61352	6.90776
CHUNG_BLISTER_CYTOTOXICITY_UP	6.60802	6.90776
RASHI_RESPONSE_TO_IONIZING_RADIATION_6	6.60241	6.90776
FOSTER_TOLERANT_MACROPHAGE_DN	6.59682	4.20411
SEKI_INFLAMMATORY_RESPONSE_LPS_UP	6.59119	5.52662
BIOCARTA_THELPER_PATHWAY	6.57982	4.82387
KEGG_CYTOKINE_CYTOKINE_RECEPTOR_INTERACTION	6.57407	6.01432
CHEN_LUNG_CANCER_SURVIVAL	6.56836	6.90776
ROSTY_CERVICAL_CANCER_PROLIFERATION_CLUSTER	6.56254	6.90776
KEGG_CYTOSOLIC_DNA_SENSING_PATHWAY	6.55668	6.90776
KEGG_VIRAL_MYOCARDITIS	6.55085	4.95677
MISSIAGLIA_REGULATED_BY_METHYLATION_DN	6.54492	6.90776
SHIN_B_CELL_LYMPHOMA_CLUSTER_8	6.53902	6.90776
WORSCHECH_TUMOR_EVASION_AND_TOLEROGENICITY_DN	6.53302	6.57214
WP_EBOLA_VIRUS_PATHWAY_ON_HOST	6.52706	5.73459
EGUCHI_CELL_CYCLE_RB1_TARGETS	6.5149	6.90776
GREENBAUM_E2A_TARGETS_UP	6.50878	6.90776
HOFFMANN_LARGE_TO_SMALL_PRE_BII_LYMPHOCYTE_UP	6.11273	6.90776
GO_TYPE_2_IMMUNE_RESPONSE	5.94218	4.10707
HP_SEROSITIS	5.9181	4.09926
HP_PANNICULITIS	5.89339	6.90776
GO_NEGATIVE_REGULATION_OF_VIRAL_PROCESS	5.88082	3.41025
GO_ADAPTIVE_IMMUNE_RESPONSE_BASED_ON_SOMATIC_RECOMBINATION_OF_IMMUNE_RECEPTORS_BUILT_FROM_IMMUNOGLOBULIN_SUPERFAMILY_DOMAINS	5.86808	6.90776
GO_NEUROINFLAMMATORY_RESPONSE	5.85519	5.64901
GO_CYTOLYSIS	5.84191	4.16769
HP_SKIN_ULCER	5.8197	3.96484
ISHIDA_E2F_TARGETS	5.81352	6.90776
ONO_AML1_TARGETS_DN	5.80834	3.18905
BOYLAN_MULTIPLE_MYELOMA_C_D_DN	5.79787	3.02609
BOYAULT_LIVER_CANCER_SUBCLASS_G5_DN	5.79258	3.8333
GRANDVAUX_IRF3_TARGETS_UP	5.78728	6.90776
PELLICCIOTTA_HDAC_IN_ANTIGEN_PRESENTATION_DN	5.78195	6.90776
SEITZ_NEOPLASTIC_TRANSFORMATION_BY_8P_DELETION_UP	5.77658	6.90776
HP_CHRONIC_PULMONARY_OBSTRUCTION	5.73249	4.63271
GO_POSITIVE_REGULATION_OF_DEFENSE_RESPONSE	5.70322	3.32382
GO_ANTIGEN_PROCESSING_AND_PRESENTATION_OF_PEPTIDE_ANTIGEN_VIA_MHC_CLASS_I	5.66282	6.90776
GO_MONOCYTE_CHEMOTAXIS	5.64199	6.90776
GO_MHC_CLASS_II_PROTEIN_COMPLEX_BINDING	5.63142	6.90776
GO_LEUKOCYTE_APOPTOTIC_PROCESS	5.55623	6.90776
REACTOME_INTERLEUKIN_12_SIGNALING	5.32766	5.26017
REACTOME_DNA_REPLICATION_PRE_INITIATION	5.32263	6.90776
LEE_LIVER_CANCER_HEPATOBLAST	5.31248	6.90776
REACTOME_REGULATION_OF_IFNA_SIGNALING	5.30736	4.44365
GO_REGULATION_OF_DEFENSE_RESPONSE_TO_VIRUS	5.25719	3.45625
ZHU_CMV_24_HR_UP	5.12394	6.90776
LINDSTEDT_DENDRITIC_CELL_MATURATION_B	5.11897	3.60863
SHIPP_DLBCL_VS_FOLLICULAR_LYMPHOMA_UP	5.06932	6.90776
VALK_AML_CLUSTER_5	4.99356	4.96019
WP_PHOTODYNAMIC_THERAPYINDUCED_NFKB_SURVIVAL_SIGNALING	4.989	6.90776
MORI_LARGE_PRE_BII_LYMPHOCYTE_UP	4.97983	6.90776
WU_APOPTOSIS_BY_CDKN1A_VIA_TP53	4.97521	6.90776
REACTOME_NEUTROPHIL_DEGRANULATION	4.97057	5.08246
REACTOME_ORC1_REMOVAL_FROM_CHROMATIN	4.96591	6.54082
REACTOME_HOST_INTERACTIONS_OF_HIV_FACTORS	4.96122	3.71383
MARKS_HDAC_TARGETS_UP	4.95652	3.31704
HIRSCH_CELLULAR_TRANSFORMATION_SIGNATURE_UP	4.94227	6.90776
GRUETZMANN_PANCREATIC_CANCER_UP	4.93747	3.61563
REACTOME_G2_M_CHECKPOINTS	4.9278	6.90776
GO_POSITIVE_REGULATION_OF_MONONUCLEAR_CELL_MIGRATION	4.86891	6.90776
GO_POSITIVE_REGULATION_OF_RESPONSE_TO_CYTOKINE_STIMULUS	4.83472	5.65992
GO_REGULATION_OF_VIRAL_GENOME_REPLICATION	4.82599	3.71207
RHEIN_ALL_GLUCOCORTICOID_THERAPY_UP	4.82336	3.36047
WANG_RESPONSE_TO_GSK3_INHIBITOR_SB216763_DN	4.81887	6.90776
CHARAFE_BREAST_CANCER_LUMINAL_VS_BASAL_DN	4.81435	3.88203
GO_HUMORAL_IMMUNE_RESPONSE	4.79931	6.90776
HP_UNUSUAL_INFECTION_BY_ANATOMICAL_SITE	4.79027	3.00989
GO_CELLULAR_RESPONSE_TO_INTERFERON_BETA	4.78113	6.90776
GO_PYRIMIDINE_NUCLEOSIDE_CATABOLIC_PROCESS	4.77192	3.4338
BIOCARTA_IL17_PATHWAY	4.72511	5.30704
TAVOR_CEBPA_TARGETS_UP	4.72276	4.52969
DORN_ADENOVIRUS_INFECTION_24HR_DN	4.72113	3.68896
SCHOEN_NFKB_SIGNALING	4.71714	3.33266
REACTOME_RESPONSE_TO_METAL_IONS	4.71313	6.90776
ELVIDGE_HIF1A_AND_HIF2A_TARGETS_DN	4.70911	6.04238
KIM_GLIS2_TARGETS_UP	4.70507	3.928
REACTOME_INTERLEUKIN_4_AND_INTERLEUKIN_13_SIGNALING	4.70101	6.90776
REACTOME_MHC_CLASS_II_ANTIGEN_PRESENTATION	4.70079	3.83077
GAVIN_FOXP3_TARGETS_CLUSTER_P6	4.69633	6.90776
LI_INDUCED_T_TO_NATURAL_KILLER_UP	4.69285	3.53461
WORSCHECH_TUMOR_EVASION_AND_TOLEROGENICITY_UP	4.68875	5.53424
HUANG_GATA2_TARGETS_UP	4.68048	4.81415
TAKEDA_TARGETS_OF_NUP98_HOXA9_FUSION_8D_DN	4.67632	3.69623
MARZEC_IL2_SIGNALING_UP	4.67214	5.18415
TARTE_PLASMA_CELL_VS_PLASMABLAST_DN	4.66795	6.90776
WIERENGA_STAT5A_TARGETS_GROUP2	4.66374	3.90093
WU_HBX_TARGETS_1_UP	4.65526	5.30351
KONG_E2F3_TARGETS	4.65134	6.90776
GRAHAM_CML_QUIESCENT_VS_NORMAL_QUIESCENT_UP	4.651	6.90776
JECHLINGER_EPITHELIAL_TO_MESENCHYMAL_TRANSITION_UP	4.64746	4.13573
JISON_SICKLE_CELL_DISEASE_UP	4.64672	6.90776
FERREIRA_EWINGS_SARCOMA_UNSTABLE_VS_STABLE_UP	4.64356	6.90776
REACTOME_TP53_REGULATES_TRANSCRIPTION_OF_DEATH_RECEPTORS_AND_LIGANDS	4.64242	4.15397
GO_RESPONSE_TO_MOLECULE_OF_BACTERIAL_ORIGIN	4.63556	6.90776
TSAI_DNAJB4_TARGETS_UP	4.63177	4.48163
GO_NEGATIVE_REGULATION_OF_IMMUNE_SYSTEM_PROCESS	4.62017	3.6916
GO_POSITIVE_REGULATION_OF_INTERLEUKIN_8_PRODUCTION	4.61239	4.71913
GO_POSITIVE_REGULATION_OF_PRODUCTION_OF_MOLECULAR_MEDIATOR_OF_IMMUNE_RESPONSE	4.59661	3.07471
GO_POSITIVE_REGULATION_OF_INTERLEUKIN_2_PRODUCTION	4.57251	3.70529
GO_T_CELL_MEDIATED_IMMUNITY	4.56441	4.69316
DORN_ADENOVIRUS_INFECTION_48HR_DN	4.55724	3.45248
BIOCARTA_CASPASE_PATHWAY	4.55343	6.54987
YU_MYC_TARGETS_DN	4.54964	3.72372
REACTOME_ASSEMBLY_OF_THE_PRE_REPLICATIVE_COMPLEX	4.51041	5.29642
PETROVA_PROX1_TARGETS_DN	4.50677	4.81741
REACTOME_CELL_CYCLE_CHECKPOINTS	4.50316	6.90776
DORN_ADENOVIRUS_INFECTION_32HR_DN	4.49587	3.2918
SASAKI_ADULT_T_CELL_LEUKEMIA	4.49229	3.48578
HINATA_NFKB_TARGETS_FIBROBLAST_UP	4.48118	6.90776
ROY_WOUND_BLOOD_VESSEL_UP	4.47213	3.04222
WP_DNA_REPLICATION	4.47003	6.62778
DEMAGALHAES_AGING_UP	4.46628	3.07367
TAKEDA_TARGETS_OF_NUP98_HOXA9_FUSION_10D_UP	4.46254	6.90776
GO_REGULATION_OF_LEUKOCYTE_APOPTOTIC_PROCESS	4.43915	6.90776
DUNNE_TARGETS_OF_AML1_MTG8_FUSION_UP	4.42268	3.7188
REACTOME_DNA_REPLICATION	4.41562	6.90776
WP_PYRIMIDINE_METABOLISM_AND_RELATED_DISEASES	4.39718	3.87439
GO_NEGATIVE_REGULATION_OF_INNATE_IMMUNE_RESPONSE	4.38901	3.9577
GO_REGULATION_OF_TYPE_2_IMMUNE_RESPONSE	4.3667	4.14541
GO_CELL_CELL_ADHESION_MEDIATED_BY_INTEGRIN	4.35659	4.16036
GO_REGULATION_OF_T_HELPER_1_TYPE_IMMUNE_RESPONSE	4.3503	6.90776
HP_JUVENILE_RHEUMATOID_ARTHRITIS	4.34404	3.39139
SIMBULAN_PARP1_TARGETS_DN	4.34135	5.27846
SHEDDEN_LUNG_CANCER_POOR_SURVIVAL_A6	4.33782	6.90776
GO_PEPTIDE_ANTIGEN_BINDING	4.33767	6.90776
GRANDVAUX_IFN_RESPONSE_NOT_VIA_IRF3	4.3343	6.01838
GO_POSITIVE_REGULATION_OF_INTERLEUKIN_1_PRODUCTION	4.3119	5.67074
GO_INTERLEUKIN_10_PRODUCTION	4.30529	6.90776
REACTOME_CROSS_PRESENTATION_OF_SOLUBLE_EXOGENOUS_ANTIGENS_ENDOSOMES_	4.301	6.63194
GO_REGULATION_OF_T_CELL_CHEMOTAXIS	4.29872	3.00453
GO_MHC_CLASS_I_PROTEIN_BINDING	4.27868	3.52618
GO_INTERLEUKIN_8_PRODUCTION	4.26506	4.99016
GO_POSITIVE_REGULATION_OF_T_CELL_MIGRATION	4.25818	3.44412
GO_INTRINSIC_APOPTOTIC_SIGNALING_PATHWAY_IN_RESPONSE_TO_DNA_DAMAGE_BY_P53_CLASS_MEDIATOR	4.25121	4.68435
HAHTOLA_SEZARY_SYNDROM_UP	4.21333	6.59389
GRAHAM_CML_DIVIDING_VS_NORMAL_QUIESCENT_UP	4.20311	6.90776
STEIN_ESRRA_TARGETS_RESPONSIVE_TO_ESTROGEN_DN	4.19964	6.90776
REACTOME_INTERLEUKIN_12_FAMILY_SIGNALING	4.18929	5.01722
GO_PATTERN_RECOGNITION_RECEPTOR_SIGNALING_PATHWAY	4.18521	3.73212
GO_POSITIVE_REGULATION_OF_ADAPTIVE_IMMUNE_RESPONSE	4.1673	5.60405
HADDAD_T_LYMPHOCYTE_AND_NK_PROGENITOR_DN	4.16588	6.90776
GO_POSITIVE_REGULATION_OF_T_HELPER_1_TYPE_IMMUNE_RESPONSE	4.14908	6.90776
BURTON_ADIPOGENESIS_PEAK_AT_16HR	4.1468	6.01024
REACTOME_FCGR_ACTIVATION	4.14345	3.28123
IGLESIAS_E2F_TARGETS_UP	4.14012	6.58959
ROETH_TERT_TARGETS_UP	4.13535	6.90776
SAGIV_CD24_TARGETS_DN	4.12881	6.90776
HUPER_BREAST_BASAL_VS_LUMINAL_DN	4.12553	5.74229
REACTOME_ANTIGEN_PRESENTATION_FOLDING_ASSEMBLY_AND_PEPTIDE_LOADING_OF_CLASS_I_MHC	4.12225	5.73847
WP_HUMAN_COMPLEMENT_SYSTEM	4.11899	4.15524
LY_AGING_PREMATURE_DN	4.11157	6.60248
BLANCO_MELO_COVID19_SARS_COV_2_INFECTION_A594_CELLS_UP	4.10567	5.26754
WP_MIRNAS_INVOLVEMENT_IN_THE_IMMUNE_RESPONSE_IN_SEPSIS	4.10543	6.90776
TAKEDA_TARGETS_OF_NUP98_HOXA9_FUSION_10D_DN	4.10234	3.53232
VECCHI_GASTRIC_CANCER_ADVANCED_VS_EARLY_DN	4.09313	3.87179
FOSTER_TOLERANT_MACROPHAGE_UP	4.08995	3.71252
GO_REGULATION_OF_PRODUCTION_OF_MOLECULAR_MEDIATOR_OF_IMMUNE_RESPONSE	4.08715	3.52001
BROWN_MYELOID_CELL_DEVELOPMENT_UP	4.08679	3.00924
CROONQUIST_IL6_DEPRIVATION_DN	4.08364	6.90776
GO_CCR_CHEMOKINE_RECEPTOR_BINDING	4.07584	4.12256
GO_NEGATIVE_REGULATION_OF_IMMUNE_RESPONSE	4.0729	5.65208
GO_MONONUCLEAR_CELL_MIGRATION	4.07161	6.90776
KLEIN_PRIMARY_EFFUSION_LYMPHOMA_UP	4.07078	4.20713
GO_VIRAL_GENOME_REPLICATION	4.07014	3.05871
GO_LYMPHOCYTE_APOPTOTIC_PROCESS	4.0671	6.90776
GO_CELL_ADHESION_MEDIATED_BY_INTEGRIN	4.06611	3.3859
WP_PROTEASOME_DEGRADATION	4.06401	5.26386
GO_PRODUCTION_OF_MOLECULAR_MEDIATOR_INVOLVED_IN_INFLAMMATORY_RESPONSE	4.06058	3.46807
VANTVEER_BREAST_CANCER_ESR1_DN	3.97923	3.70347
HORIUCHI_WTAP_TARGETS_DN	3.96822	6.90776
REACTOME_TRANSLESION_SYNTHESIS_BY_Y_FAMILY_DNA_POLYMERASES_BYPASSES_LESIONS_ON_DNA_TEMPLATE	3.96527	4.82064
REACTOME_DNA_STRAND_ELONGATION	3.96237	3.94228
ODONNELL_TFRC_TARGETS_DN	3.95943	6.90776
SA_MMP_CYTOKINE_CONNECTION	3.95347	4.13717
ELVIDGE_HIF1A_TARGETS_DN	3.94755	6.90776
GO_PRODUCTION_OF_MOLECULAR_MEDIATOR_OF_IMMUNE_RESPONSE	3.94114	3.49483
GEORGES_CELL_CYCLE_MIR192_TARGETS	3.93371	4.47854
KEGG_NOD_LIKE_RECEPTOR_SIGNALING_PATHWAY	3.93085	6.90776
KEGG_PROTEASOME	3.92795	3.60469
REACTOME_ACTIVATION_OF_THE_PRE_REPLICATIVE_COMPLEX	3.92648	4.94416
GO_IMMUNOGLOBULIN_BINDING	3.92526	3.20917
GO_INFLAMMATORY_CELL_APOPTOTIC_PROCESS	3.92031	6.90776
GO_NEGATIVE_REGULATION_OF_CYTOKINE_PRODUCTION_INVOLVED_IN_IMMUNE_RESPONSE	3.91518	3.39684
WILCOX_RESPONSE_TO_PROGESTERONE_UP	3.91367	6.90776
WP_IL10_ANTIINFLAMMATORY_SIGNALING_PATHWAY	3.88183	3.2897
MORI_PRE_BI_LYMPHOCYTE_UP	3.87902	6.90776
REACTOME_ANTIVIRAL_MECHANISM_BY_IFN_STIMULATED_GENES	3.82452	3.04069
GO_TOLL_LIKE_RECEPTOR_SIGNALING_PATHWAY	3.82452	4.64923
WP_VITAMIN_B12_METABOLISM	3.82177	6.90776
HP_RECURRENT_VIRAL_INFECTIONS	3.81953	3.02393
REACTOME_TP53_REGULATES_TRANSCRIPTION_OF_CELL_DEATH_GENES	3.8134	3.87695
ONDER_CDH1_TARGETS_3_DN	3.80838	3.27916
REACTOME_THE_ROLE_OF_GTSE1_IN_G2_M_PROGRESSION_AFTER_G2_CHECKPOINT	3.8029	5.31526
CHANG_IMMORTALIZED_BY_HPV31_DN	3.79669	3.14572
DEBIASI_APOPTOSIS_BY_REOVIRUS_INFECTION_UP	3.78218	6.03843
WINNEPENNINCKX_MELANOMA_METASTASIS_UP	3.7795	6.90776
RAMALHO_STEMNESS_DN	3.77679	4.88523
YU_MYC_TARGETS_UP	3.77357	6.90776
MARKEY_RB1_CHRONIC_LOF_DN	3.773	4.61624
SCHAVOLT_TARGETS_OF_TP53_AND_TP63	3.77087	6.58524
TAKEDA_TARGETS_OF_NUP98_HOXA9_FUSION_3D_DN	3.77035	3.861
SA_CASPASE_CASCADE	3.76784	3.43514
HASINA_NOL7_TARGETS_UP	3.75819	4.21009
GO_NEGATIVE_REGULATION_OF_MYELOID_CELL_APOPTOTIC_PROCESS	3.75071	3.24666
WU_CELL_MIGRATION	3.73308	4.47634
GO_NEGATIVE_REGULATION_OF_INTERLEUKIN_10_PRODUCTION	3.73191	4.71055
OSMAN_BLADDER_CANCER_UP	3.73045	3.39254
GO_MYELOID_CELL_APOPTOTIC_PROCESS	3.72716	6.90776
SHARMA_PILOCYTIC_ASTROCYTOMA_LOCATION_UP	3.67889	4.23347
HP_RECURRENT_SKIN_INFECTIONS	3.67596	3.69849
HUANG_DASATINIB_RESISTANCE_UP	3.65874	3.34167
DELYS_THYROID_CANCER_UP	3.65614	3.41717
KAUFFMANN_MELANOMA_RELAPSE_UP	3.63712	6.90776
THEILGAARD_NEUTROPHIL_AT_SKIN_WOUND_UP	3.63405	6.90776
KEGG_PRIMARY_IMMUNODEFICIENCY	3.63152	3.44155
REACTOME_APC_C_MEDIATED_DEGRADATION_OF_CELL_CYCLE_PROTEINS	3.62388	6.5809
DORN_ADENOVIRUS_INFECTION_12HR_UP	3.62133	6.02242
GO_POSITIVE_REGULATION_OF_LYMPHOCYTE_APOPTOTIC_PROCESS	3.62126	4.43096
REACTOME_TNFR2_NON_CANONICAL_NF_KB_PATHWAY	3.61879	3.92273
TSAI_RESPONSE_TO_IONIZING_RADIATION	3.61622	3.53003
KIM_LIVER_CANCER_POOR_SURVIVAL_UP	3.60417	4.52654
GO_NEUTROPHIL_CHEMOTAXIS	3.59688	6.90776
FOURNIER_ACINAR_DEVELOPMENT_LATE_DN	3.56751	6.62363
SEMBA_FHIT_TARGETS_UP	3.56003	3.2483
SENESE_HDAC1_TARGETS_UP	3.54184	3.0727
GO_GRANULOCYTE_CHEMOTAXIS	3.53853	6.90776
GO_POSITIVE_REGULATION_OF_LEUKOCYTE_APOPTOTIC_PROCESS	3.52734	6.90776
GO_GRANULOCYTE_MIGRATION	3.52296	6.90776
WHITFIELD_CELL_CYCLE_LITERATURE	3.51452	6.90776
GO_GLYCOSYL_COMPOUND_CATABOLIC_PROCESS	3.5098	3.26665
ZHOU_CELL_CYCLE_GENES_IN_IR_RESPONSE_6HR	3.48908	6.90776
GO_LYMPHOCYTE_MIGRATION	3.47577	3.0326
SHIN_B_CELL_LYMPHOMA_CLUSTER_5	3.47158	5.29285
NIKOLSKY_BREAST_CANCER_22Q13_AMPLICON	3.46673	3.53691
PEDERSEN_METASTASIS_BY_ERBB2_ISOFORM_4	3.43666	4.94288
ALCALAY_AML_BY_NPM1_LOCALIZATION_DN	3.42292	5.8465
ZHAN_MULTIPLE_MYELOMA_PR_UP	3.42053	6.90776
LU_TUMOR_VASCULATURE_UP	3.41815	6.00204
GO_REGULATION_OF_LYMPHOCYTE_APOPTOTIC_PROCESS	3.41815	6.90776
GO_CYTOKINE_SECRETION	3.4094	3.53235
SUNG_METASTASIS_STROMA_DN	3.40689	5.07901
TUOMISTO_TUMOR_SUPPRESSION_BY_COL13A1_UP	3.40187	6.90776
REACTOME_NEGATIVE_REGULATION_OF_NOTCH4_SIGNALING	3.39986	6.60676
GO_REGULATION_OF_PATTERN_RECOGNITION_RECEPTOR_SIGNALING_PATHWAY	3.39986	3.32914
WP_NOVEL_INTRACELLULAR_COMPONENTS_OF_RIGILIKE_RECEPTOR_RLR_PATHWAY	3.39956	4.13329
DUTERTRE_ESTRADIOL_RESPONSE_24HR_UP	3.39511	6.90776
SONG_TARGETS_OF_IE86_CMV_PROTEIN	3.39162	6.90776
GO_REGULATION_OF_ADAPTIVE_IMMUNE_RESPONSE	3.38798	6.90776
GO_NEUTROPHIL_MIGRATION	3.38446	6.90776
GO_DEFENSE_RESPONSE_TO_BACTERIUM	3.38399	3.74528
GO_T_CELL_APOPTOTIC_PROCESS	3.37223	3.19675
GO_FICOLIN_1_RICH_GRANULE_MEMBRANE	3.37156	3.29441
GO_REGULATION_OF_NEUTROPHIL_ACTIVATION	3.36813	3.95056
PID_IFNG_PATHWAY	3.3584	4.15117
SOTIRIOU_BREAST_CANCER_GRADE_1_VS_3_UP	3.34742	6.90776
TARTE_PLASMA_CELL_VS_B_LYMPHOCYTE_UP	3.34512	3.18018
HP_DEMYELINATING_PERIPHERAL_NEUROPATHY	3.32972	3.00629
GALLUZZI_PERMEABILIZE_MITOCHONDRIA	3.32116	5.32271
REACTOME_DECTIN_1_MEDIATED_NONCANONICAL_NF_KB_SIGNALING	3.31886	3.18225
VERNELL_RETINOBLASTOMA_PATHWAY_UP	3.30441	6.90776
REACTOME_GENE_AND_PROTEIN_EXPRESSION_BY_JAK_STAT_SIGNALING_AFTER_INTERLEUKIN_12_STIMULATION	3.29535	3.90465
HP_ARTERIAL_THROMBOSIS	3.29147	3.18995
WACKER_HYPOXIA_TARGETS_OF_VHL	3.28753	6.90776
MOLENAAR_TARGETS_OF_CCND1_AND_CDK4_DN	3.28534	6.90776
REACTOME_REGULATION_OF_IFNG_SIGNALING	3.28491	3.35158
REACTOME_TERMINATION_OF_TRANSLESION_DNA_SYNTHESIS	3.28267	3.60627
REACTOME_INTERLEUKIN_1_FAMILY_SIGNALING	3.2782	3.38916
CROMER_TUMORIGENESIS_UP	3.2693	6.55436
GO_PYRIMIDINE_CONTAINING_COMPOUND_CATABOLIC_PROCESS	3.2622	3.46245
GO_CELLULAR_RESPONSE_TO_VIRUS	3.25525	3.50749
REICHERT_MITOSIS_LIN9_TARGETS	3.24214	6.90776
TAKEDA_TARGETS_OF_NUP98_HOXA9_FUSION_8D_UP	3.2329	4.46933
REACTOME_MITOTIC_G1_PHASE_AND_G1_S_TRANSITION	3.23072	6.90776
GO_PATTERN_RECOGNITION_RECEPTOR_ACTIVITY	3.22376	3.03047
VECCHI_GASTRIC_CANCER_ADVANCED_VS_EARLY_UP	3.21183	3.18501
ZHOU_CELL_CYCLE_GENES_IN_IR_RESPONSE_24HR	3.20915	6.90776
REACTOME_CELL_CYCLE_MITOTIC	3.20912	6.90776
NGO_MALIGNANT_GLIOMA_1P_LOH	3.20702	3.4329
VANTVEER_BREAST_CANCER_METASTASIS_DN	3.2049	6.90776
CHARAFE_BREAST_CANCER_LUMINAL_VS_MESENCHYMAL_DN	3.20276	3.1087
LU_TUMOR_ENDOTHELIAL_MARKERS_UP	3.18738	3.18163
BLANCO_MELO_BRONCHIAL_EPITHELIAL_CELLS_INFLUENZA_A_DEL_NS1_INFECTION_DN	3.17548	6.90776
HAHTOLA_CTCL_CUTANEOUS	3.17503	3.36309
GO_RAGE_RECEPTOR_BINDING	3.17495	6.90776
FLORIO_NEOCORTEX_BASAL_RADIAL_GLIA_DN	3.16214	6.90776
REACTOME_SEPARATION_OF_SISTER_CHROMATIDS	3.16004	6.90776
BOHN_PRIMARY_IMMUNODEFICIENCY_SYNDROM_UP	3.15696	3.8358
HAHTOLA_MYCOSIS_FUNGOIDES_CD4_UP	3.15513	3.47593
REACTOME_DNA_DAMAGE_BYPASS	3.15487	3.53342
PID_UPA_UPAR_PATHWAY	3.12116	3.07961
REACTOME_SWITCHING_OF_ORIGINS_TO_A_POST_REPLICATIVE_STATE	3.1191	4.58763
HP_ABNORMALITY_OF_IMMUNE_SERUM_PROTEIN_PHYSIOLOGY	3.11851	3.94331
REACTOME_RESOLUTION_OF_SISTER_CHROMATID_COHESION	3.11715	6.90776
GO_TRANSLESION_SYNTHESIS	3.11521	3.50121
GAZDA_DIAMOND_BLACKFAN_ANEMIA_PROGENITOR_UP	3.09923	5.29996
REACTOME_MITOTIC_METAPHASE_AND_ANAPHASE	3.09847	6.90776
REACTOME_AUF1_HNRNP_D0_BINDS_AND_DESTABILIZES_MRNA	3.09719	3.71002
GO_ANTIMICROBIAL_HUMORAL_RESPONSE	3.09646	6.90776
GO_SECRETORY_GRANULE_MEMBRANE	3.08998	5.66164
HP_MEDIASTINAL_LYMPHADENOPATHY	3.08671	6.90776
WOO_LIVER_CANCER_RECURRENCE_UP	3.07759	4.12738
HP_ABNORMALITY_OF_THE_THORACIC_CAVITY	3.07753	4.15289
MACAEVA_PBMC_RESPONSE_TO_IR	3.07497	3.70574
WP_APOPTOSIS_MODULATION_AND_SIGNALING	3.07089	3.40858
WOOD_EBV_EBNA1_TARGETS_DN	3.0488	3.16557
BROWNE_HCMV_INFECTION_2HR_DN	3.04854	4.22769
BHATI_G2M_ARREST_BY_2METHOXYESTRADIOL_UP	3.04194	5.27119
LEI_MYB_TARGETS	3.02087	3.72128
KEGG_AMINO_SUGAR_AND_NUCLEOTIDE_SUGAR_METABOLISM	3.01933	3.24064
MEBARKI_HCC_PROGENITOR_FZD8CRD_UP	3.01555	6.90776
GO_MAINTENANCE_OF_GASTROINTESTINAL_EPITHELIUM	3.01426	4.6159
KEGG_RIG_I_LIKE_RECEPTOR_SIGNALING_PATHWAY	3.01361	4.13598
DAZARD_RESPONSE_TO_UV_SCC_UP	3.01357	4.21889
TANG_SENESCENCE_TP53_TARGETS_DN	3.01164	6.54534
GO_ACUTE_INFLAMMATORY_RESPONSE	3.01072	6.90776
REACTOME_SCF_SKP2_MEDIATED_DEGRADATION_OF_P27_P21	3.00774	4.46324
