# Supplementary material for: SSCS: A Stage Supervised Subtyping System for Colorectal Cancer
Source: Biomedicines. 2021 Dec 2;9(12):1815. doi: 10.3390/biomedicines9121815 (PMC8698601; doi:10.3390/biomedicines9121815)
Supplement: Supplementary file 1 [file biomedicines-09-01815-s001.zip › TableS3.xlsx]

## Sheet: TableS3
Table S3. 94 dysregulated gene sets between early_MSI-H, early_non-MSI-H, advanced_MSI-H, and advanced_non-MSI-H identified from the TCGA and CPTAC cohorts
	TCGA_Early_MSI-H	TCGA_Early_non-MSI-H	TCGA_Advanced_MSI-H	TCGA_Advanced_non-MSI-H	CPTAC_Early_MSI-H	CPTAC_Early_non-MSI-H	CPTAC_Advanced_MSI-H	CPTAC_Advanced_non-MSI-H
WATANABE_COLON_CANCER_MSI_VS_MSS_DN	-6.90776	6.90776	-6.90776	6.90776	-6.90776	6.90776	-6.90776	6.90776
SABATES_COLORECTAL_ADENOMA_UP	-1.82399	6.90776	-2.55495	-3.88889	-3.36952	6.90776	-4.44025	2.82792
NIKOLSKY_BREAST_CANCER_20Q11_AMPLICON	-6.90776	2.27478	-6.90776	6.90776	-6.90776	6.90776	-6.90776	5.56971
NIKOLSKY_BREAST_CANCER_20Q12_Q13_AMPLICON	-6.90776	-0.508944	-2.59326	6.90776	-6.90776	6.90776	-6.90776	4.29416
KEGG_PEROXISOME	-0.9779	5.74799	-2.41094	-0.264812	-2.01891	6.90776	-1.02268	-1.60321
GO_MICROBODY_LUMEN	-1.23894	6.90776	-1.07631	0.0522411	-1.7163	6.90776	-1.51864	-0.124272
KEGG_RETINOL_METABOLISM	-1.25169	3.55947	-1.42225	-0.222469	-2.49468	4.44475	-0.197147	-1.27268
REACTOME_BIOLOGICAL_OXIDATIONS	-1.43012	3.26032	-2.44689	0.384957	-2.45499	3.33941	-1.01688	1.12775
REACTOME_PEROXISOMAL_PROTEIN_IMPORT	-0.923592	5.56565	-1.68589	-0.0808847	-0.906588	3.20665	-0.421915	-0.227177
SUMI_HNF4A_TARGETS	-6.90776	2.2199	-2.4921	3.7868	-3.95201	3.16408	-6.90776	2.37717
REACTOME_PHASE_II_CONJUGATION_OF_COMPOUNDS	-1.35833	4.15914	-2.55552	0	-0.869765	1.97163	0.86574	-2.59306
GO_POSTSYNAPSE_ASSEMBLY	-2.57516	0.293888	-1.16194	6.90776	-1.94003	1.77573	-2.27371	4.05422
LAIHO_COLORECTAL_CANCER_SERRATED_DN	-5.68905	4.2927	-2.33933	2.19994	-6.90776	1.53554	-6.90776	6.90776
NIKOLSKY_BREAST_CANCER_7P22_AMPLICON	-1.24448	-0.131476	-0.366451	4.83491	-1.45646	1.01011	-1.793	1.77679
GO_SODIUM_ION_HOMEOSTASIS	-1.40515	0.161143	-0.763698	6.90776	-1.86756	0.826747	-1.49602	3.23694
REACTOME_WNT_LIGAND_BIOGENESIS_AND_TRAFFICKING	-0.427205	-0.273424	-0.012599	3.22865	-1.28103	0.689474	-0.919822	1.8349
CHANGOLKAR_H2AFY_TARGETS_UP	-1.33439	3.33443	-1.38938	0.376018	-0.711922	0.526938	-2.85142	1.40764
GO_THYROID_HORMONE_METABOLIC_PROCESS	-1.38226	6.90776	-1.21443	0.0754458	-1.07972	0.486979	-2.19553	3.66951
REACTOME_METABOLISM_OF_FAT_SOLUBLE_VITAMINS	-1.16395	0	-1.0131	4.94613	-1.27855	0.308878	-2.26423	3.72588
GO_REGULATION_OF_EXCRETION	-0.911154	0.00881877	-0.323765	3.39451	-1.0627	0.291302	-0.926291	2.34442
ST_WNT_BETA_CATENIN_PATHWAY	-6.90776	1.03198	-2.4879	3.76128	-1.37571	0.283903	-2.42861	6.3198
NIKOLSKY_BREAST_CANCER_19Q13.1_AMPLICON	-3.10751	6.90776	-6.90776	3.78332	-1.74991	0.24146	-2.39731	4.44714
GO_REGULATION_OF_RENAL_SYSTEM_PROCESS	-1.22472	0.0535485	-0.529703	3.39911	-1.1669	0.238943	-1.32765	2.41907
KEGG_RENIN_ANGIOTENSIN_SYSTEM	-1.63486	0.362549	-1.24552	3.31357	-0.778749	0.238448	-0.40854	0.921831
GO_MYOFILAMENT	-0.164816	-0.981896	-0.237293	3.00266	-0.968295	0.208132	-1.64077	3.26466
NAKAYAMA_SOFT_TISSUE_TUMORS_PCA1_DN	-2.65414	-0.558529	-1.71358	6.90776	-2.11453	0.163225	-4.44178	6.90776
WP_HEDGEHOG_SIGNALING_PATHWAY_NETPATH	-1.37753	0	-1.47085	3.77964	-2.403	0.103274	-2.93227	5.91225
GO_HOMOPHILIC_CELL_ADHESION_VIA_PLASMA_MEMBRANE_ADHESION_MOLECULES	-1.23241	-1.26429	-0.430644	6.90776	-1.42134	0.103241	-4.2957	6.90776
LI_ADIPOGENESIS_BY_ACTIVATED_PPARG	-0.00389759	-0.805779	-0.658746	3.02277	-0.27933	0	-1.692	2.16448
REACTOME_STRIATED_MUSCLE_CONTRACTION	-0.0388032	-1.89659	0	3.75652	-2.27351	0	-2.42884	3.89896
WP_STRIATED_MUSCLE_CONTRACTION_PATHWAY	-0.14024	-2.07609	0	3.62081	-2.2876	0	-2.4749	6.18899
WATANABE_COLON_CANCER_MSI_VS_MSS_UP	6.90776	-6.90776	6.90776	-6.90776	6.90776	-6.90776	6.90776	-6.90776
PAPASPYRIDONOS_UNSTABLE_ATEROSCLEROTIC_PLAQUE_DN	-1.6204	-1.67745	0	4.77428	-3.18175	-4.95565	-1.69076	6.90776
WATANABE_ULCERATIVE_COLITIS_WITH_CANCER_DN	6.90776	-1.42674	6.90776	-6.90776	6.40414	-4.60098	6.90776	-2.94531
KOINUMA_COLON_CANCER_MSI_UP	6.90776	-4.61651	6.90776	-6.90776	6.90776	-6.90776	6.90776	-5.25775
RIZ_ERYTHROID_DIFFERENTIATION_APOBEC2	-0.860099	-0.087095	-0.268533	3.22018	-0.780471	-0.363513	-1.47495	3.72904
FARMER_BREAST_CANCER_CLUSTER_1	6.90776	-0.712045	6.90776	-6.90776	6.90776	-6.90776	6.90776	-6.90776
BOWIE_RESPONSE_TO_EXTRACELLULAR_MATRIX	6.90776	-1.09079	6.90776	-6.90776	5.9318	-3.00736	6.90776	-6.90776
BOWIE_RESPONSE_TO_TAMOXIFEN	6.90776	-1.06071	6.90776	-6.90776	6.3886	-4.30093	6.90776	-6.90776
EINAV_INTERFERON_SIGNATURE_IN_CANCER	6.90776	-2.90505	6.90776	-6.90776	6.90776	-6.90776	6.90776	-6.20283
SEMBA_FHIT_TARGETS_UP	2.92419	-2.65319	5.26326	-1.22326	3.39615	-6.36299	3.10597	0.337447
RICKMAN_HEAD_AND_NECK_CANCER_F	-1.61274	-1.48448	-0.47074	6.90776	-2.06656	-4.16164	-0.8397	6.90776
WIELAND_UP_BY_HBV_INFECTION	6.90776	-6.90776	6.90776	-6.90776	6.90776	-6.90776	6.90776	-6.57687
GRANDVAUX_IRF3_TARGETS_UP	5.01365	-2.97611	5.5844	-6.90776	4.08109	-3.72476	3.90778	-1.89832
SANA_RESPONSE_TO_IFNG_UP	6.90776	-4.30019	6.90776	-6.90776	6.90776	-6.90776	6.90776	-6.90776
BENNETT_SYSTEMIC_LUPUS_ERYTHEMATOSUS	6.90776	-3.20532	6.90776	-6.90776	6.90776	-6.90776	6.90776	-6.19407
MODY_HIPPOCAMPUS_NEONATAL	-0.627622	-0.767957	0	3.68032	-0.30624	-2.58955	-0.190422	3.35794
BROWNE_INTERFERON_RESPONSIVE_GENES	6.90776	-3.80263	6.90776	-6.90776	6.90776	-6.90776	6.90776	-6.90776
ZHENG_RESPONSE_TO_ARSENITE_UP	5.79781	-2.38804	6.50256	-6.90776	5.15862	-2.85919	6.90776	-6.55288
JACKSON_DNMT1_TARGETS_DN	-1.15582	0	-0.760014	3.67774	-0.0855361	-1.58954	-2.35914	6.90776
KIM_LRRC3B_TARGETS	6.90776	-3.32886	6.90776	-6.90776	5.4326	-5.21572	6.90776	-6.90776
SMID_BREAST_CANCER_RELAPSE_IN_LUNG_DN	-1.31897	-0.397036	-0.863722	3.76257	-0.0736035	-2.56037	-1.64569	6.90776
SMID_BREAST_CANCER_LUMINAL_A_UP	-2.83212	-0.7213	-1.45337	6.90776	-2.71418	-2.99575	-6.90776	6.90776
MOSERLE_IFNA_RESPONSE	6.90776	-1.73404	6.90776	-6.90776	6.90776	-6.90776	6.90776	-6.90776
BOQUEST_STEM_CELL_CULTURED_VS_FRESH_DN	-1.83992	-0.22497	-0.508695	3.68405	-2.28809	-3.67758	-4.09193	6.90776
ZHANG_INTERFERON_RESPONSE	6.90776	-1.49946	6.90776	-6.90776	6.61501	-4.11708	6.90776	-6.90776
LI_WILMS_TUMOR	-2.36224	-0.370093	-0.861164	6.90776	0	-1.85515	-0.197975	1.87243
ONO_AML1_TARGETS_UP	6.90776	-0.780297	6.90776	-6.90776	2.63361	-2.44286	2.70736	-0.78957
UROSEVIC_RESPONSE_TO_IMIQUIMOD	6.90776	-2.57989	6.90776	-6.90776	6.90776	-5.2419	6.90776	-6.90776
KORKOLA_EMBRYONIC_CARCINOMA_VS_SEMINOMA_DN	-2.20455	0	-0.882493	3.74664	-0.458818	-3.29462	-0.0876407	3.38958
NAKAYAMA_SOFT_TISSUE_TUMORS_PCA2_DN	-2.70826	-0.685695	-1.97098	6.90776	-2.47701	-2.6706	-1.15703	6.90776
VANDESLUIS_COMMD1_TARGETS_GROUP_3_DN	-1.15683	-0.750268	-0.766815	4.25642	-0.602959	-2.81408	-0.710151	6.90776
HOLLERN_ADENOMYOEPITHELIAL_BREAST_TUMOR	-1.33518	-1.82195	0	3.773	-2.12746	-6.90776	-1.3565	6.90776
BIOCARTA_BLYMPHOCYTE_PATHWAY	6.1139	-3.83372	5.79232	-6.90776	3.14872	-5.01591	3.96095	-0.896415
BIOCARTA_CTL_PATHWAY	6.90776	-0.748914	6.90776	-6.90776	4.1635	-4.46776	4.44433	-3.15487
BIOCARTA_INFLAM_PATHWAY	6.90776	-4.372	6.90776	-5.90963	3.99188	-5.52874	6.90776	-1.32392
BIOCARTA_TCRA_PATHWAY	5.85188	-1.61009	6.61957	-6.90776	3.48265	-4.23182	4.43636	-0.909017
BIOCARTA_NO2IL12_PATHWAY	6.90776	0	6.90776	-6.90776	1.88236	-2.49564	4.17423	-1.11584
BIOCARTA_TCYTOTOXIC_PATHWAY	5.99527	-0.0467353	6.90776	-6.90776	2.26106	-3.92354	4.17079	-0.00336566
BIOCARTA_THELPER_PATHWAY	5.31538	-0.0648372	5.81111	-6.90776	1.88341	-3.99258	3.98089	0.26364
BIOCARTA_CTLA4_PATHWAY	6.90776	-0.406315	6.90776	-6.90776	3.69836	-4.63848	4.19957	-0.975722
BIOCARTA_MHC_PATHWAY	5.76647	-2.28298	5.49816	-6.90776	4.00036	-0.703602	6.90776	-6.90776
KEGG_ALLOGRAFT_REJECTION	6.90776	-1.40552	6.90776	-6.90776	2.03279	-5.94054	6.90776	-3.75917
KEGG_GRAFT_VERSUS_HOST_DISEASE	6.90776	-4.32489	6.90776	-6.90776	4.34258	-6.90776	6.90776	-4.6234
REACTOME_GENERATION_OF_SECOND_MESSENGER_MOLECULES	6.90776	-0.948478	6.90776	-6.90776	0.577144	-5.99756	6.90776	0.0636429
REACTOME_MOLECULES_ASSOCIATED_WITH_ELASTIC_FIBRES	-0.639701	-1.4788	0	3.77452	0	-6.90776	-0.371702	6.90776
REACTOME_PD_1_SIGNALING	6.90776	-2.6252	6.90776	-6.90776	1.73014	-6.90776	6.90776	-1.05432
REACTOME_PHASE_0_RAPID_DEPOLARISATION	-2.85606	0.0360729	-0.573694	4.86568	-0.511743	-0.0430328	-0.202214	2.11089
REACTOME_RESPONSE_TO_METAL_IONS	3.43681	-2.015	5.67683	-4.06139	5.95178	-3.00712	6.90776	-6.57214
REACTOME_TP53_REGULATES_TRANSCRIPTION_OF_DEATH_RECEPTORS_AND_LIGANDS	4.64245	-1.60102	2.91742	-2.65336	2.17243	-2.15987	1.86549	-1.78076
WP_TYPE_II_INTERFERON_SIGNALING_IFNG	6.90776	-1.92025	6.90776	-6.90776	6.90776	-6.90776	6.90776	-6.90776
WP_CYTOKINES_AND_INFLAMMATORY_RESPONSE	6.90776	-1.99679	6.90776	-6.90776	4.41612	-2.99567	5.12898	-2.74208
WP_PATHOGENESIS_OF_SARSCOV2_MEDIATED_BY_NSP9NSP10_COMPLEX	6.88433	-2.01771	6.90776	-6.90776	3.98998	-5.89046	6.90776	-0.740826
GO_T_CELL_ACTIVATION_VIA_T_CELL_RECEPTOR_CONTACT_WITH_ANTIGEN_BOUND_TO_MHC_MOLECULE_ON_ANTIGEN_PRESENTING_CELL	3.43837	-0.625339	4.43754	-6.90776	1.10645	-3.52316	2.24281	0.00825397
GO_CALCIUM_DEPENDENT_CELL_CELL_ADHESION_VIA_PLASMA_MEMBRANE_CELL_ADHESION_MOLECULES	-0.653869	-1.22187	-0.432723	3.56204	-0.126369	-1.39719	-1.20457	6.90776
GO_NLRP3_INFLAMMASOME_COMPLEX_ASSEMBLY	3.04033	-0.779206	4.93487	-4.38339	1.4206	-2.25246	0.978485	0.0255948
GO_NEGATIVE_REGULATION_OF_CARTILAGE_DEVELOPMENT	-1.06262	-0.395208	-0.0138454	3.08146	-0.506286	-2.71507	-2.06388	6.90776
GO_POSITIVE_REGULATION_BY_SYMBIONT_OF_ENTRY_INTO_HOST	3.02819	-0.753258	2.87553	-3.23849	0.508844	-1.14006	2.10685	-0.334955
GO_REGULATION_OF_NEUTROPHIL_ACTIVATION	4.69038	-1.2198	4.58184	-4.93312	4.35831	-6.90776	3.42274	-0.27017
GO_MHC_PROTEIN_COMPLEX	6.90776	-1.83521	6.90776	-6.90776	0.8823	-4.46732	6.90776	-2.4424
GO_MHC_CLASS_II_PROTEIN_COMPLEX	6.90776	-1.8088	6.90776	-6.90776	0.122348	-4.11616	6.90776	-0.508695
GO_MHC_PROTEIN_COMPLEX_BINDING	6.90776	-1.218	6.90776	-6.90776	2.92994	-5.60115	6.90776	-3.37203
GO_MHC_CLASS_II_PROTEIN_COMPLEX_BINDING	5.68757	-1.04027	6.90776	-6.90776	1.39489	-3.54384	6.90776	-1.62613
HP_JUVENILE_RHEUMATOID_ARTHRITIS	3.97539	-0.609155	4.4914	-6.90776	1.51308	-2.54895	3.00679	-0.545486
