# Supplementary material for: SSCS: A Stage Supervised Subtyping System for Colorectal Cancer
Source: Biomedicines. 2021 Dec 2;9(12):1815. doi: 10.3390/biomedicines9121815 (PMC8698601; doi:10.3390/biomedicines9121815)
Supplement: Supplementary file 1 [file biomedicines-09-01815-s001.zip › TableS4.xlsx]

## Sheet: TableS4
Table S4. 89 dysregulated gene sets between CMS 1-4 (in early-stage) and CMS 1-4 (in advanced-stage) identified from the three cohorts
	CMS1_Early_TCGA	CMS1_Advanced_TCGA	CMS2_Early_TCGA	CMS2_Advanced_TCGA	CMS3_Early_TCGA	CMS3_Advanced_TCGA	CMS4_Early_TCGA	CMS4_Advanced_TCGA	CMS1_Early_CPTAC	CMS1_Advanced_CPTAC	CMS2_Early_CPTAC	CMS2_Advanced_CPTAC	CMS3_Early_CPTAC	CMS3_Advanced_CPTAC	CMS4_Early_CPTAC	CMS4_Advanced_CPTAC	CMS1_Early_GEO	CMS1_Advanced_GEO	CMS2_Early_GEO	CMS2_Advanced_GEO	CMS3_Early_GEO	CMS3_Advanced_GEO	CMS4_Early_GEO	CMS4_Advanced_GEO
WATANABE_COLON_CANCER_MSI_VS_MSS_DN	-6.90776	-6.90776	6.90776	6.90776	-2.31174	-4.71484	0.588427	1.1333	-6.90776	-6.90776	6.90776	6.90776	-1.22486	-3.38789	6.90776	-2.74847	-6.90776	-6.90776	6.90776	6.90776	-6.90776	-5.9717	-6.90776	-6.90776
LAIHO_COLORECTAL_CANCER_SERRATED_DN	-3.06712	-1.93095	5.84896	6.90776	-0.0273301	0	-0.123592	-0.286816	-1.93116	-6.90776	6.90776	6.90776	-4.06343	-6.90776	1.20892	-3.46926	-6.90776	-6.90776	6.90776	6.90776	-1.93399	-1.44447	-6.90776	-6.08275
VECCHI_GASTRIC_CANCER_ADVANCED_VS_EARLY_DN	1.74715	2.85775	-1.69805	-1.75014	6.90776	6.90776	-6.90776	-6.90776	-0.592886	4.60367	-2.77542	-6.90776	6.90776	6.90776	-6.90776	-6.90776	3.44114	1.80454	-0.90862	-0.972755	6.90776	6.90776	-6.90776	-6.90776
TIEN_INTESTINE_PROBIOTICS_2HR_UP	0	0	0	0.0110913	3.37685	3.99524	-1.40377	-3.39186	0	1.44337	0	-0.16791	4.08798	1.21211	-4.65668	-1.71092	0.0951572	-0.676172	0.757216	0.113807	0.747709	1.11185	-1.49942	-2.61706
MCBRYAN_TERMINAL_END_BUD_UP	-0.589959	0	-4.28613	-2.89917	-1.66606	-3.28443	4.53508	5.09098	0	-0.00683329	-2.37351	-0.341997	-4.78828	-4.78846	6.26511	4.99027	-1.76206	-0.718978	-4.39345	-4.16498	-1.86724	-1.9888	4.7789	3.93601
AUNG_GASTRIC_CANCER	-0.429876	-0.249526	0.888554	-0.0893997	6.90776	2.52868	-0.154644	-2.96532	-0.290874	-0.0854381	0.182926	0.497383	3.46609	2.55029	-5.75153	-6.02362	-1.18074	-1.11355	1.73659	1.02129	3.81308	6.90776	-4.61913	-6.47293
NIKOLSKY_BREAST_CANCER_20Q11_AMPLICON	-6.90776	-6.90776	6.90776	6.90776	-4.23789	-2.89215	0.0102827	0.873447	-6.90776	-5.88032	6.90776	6.90776	-2.6854	-6.90776	1.4913	-1.13473	-6.90776	-6.90776	6.90776	6.90776	-6.90776	-6.69281	-6.08231	-4.76398
XU_RESPONSE_TO_TRETINOIN_AND_NSC682994_DN	0	-0.253886	3.03084	2.25599	0	-0.0352542	-3.82049	-2.47994	0	0	1.23299	0.101225	0	-0.7646	-0.816717	-3.23712	0.213651	-0.387547	4.72743	4.20552	-1.19528	-1.47042	-5.28305	-3.67869
CHIANG_LIVER_CANCER_SUBCLASS_INTERFERON_DN	-2.48376	-1.88961	4.64	3.91824	-2.76869	-0.898107	0.115793	0.707591	-1.29503	-5.80621	2.06074	6.90776	-1.75794	-3.84222	0.43804	0.0160176	-2.64883	-2.50931	3.34526	2.37369	-1.2981	-1.18153	-0.326284	-1.3835
SUMI_HNF4A_TARGETS	-5.19043	-1.8085	5.64417	2.72754	-1.25183	-0.109123	0.148082	0.334396	-4.23016	-6.90776	3.57412	2.50453	0.843412	0.493084	1.73144	-1.31673	-4.44246	-3.14275	6.90776	6.49214	-1.57915	-0.773512	-2.62739	-5.83385
HOLLERN_ADENOMYOEPITHELIAL_BREAST_TUMOR	-1.37081	-0.461242	-6.32571	-4.99524	-6.6133	-6.90776	6.90776	6.90776	-0.470548	-0.348154	-3.36816	1.63563	-6.90776	-5.48061	6.90776	6.90776	-3.17987	-2.67126	-6.78042	-6.52345	-6.90776	-6.71178	6.90776	6.90776
KEGG_PENTOSE_AND_GLUCURONATE_INTERCONVERSIONS	-1.24799	-0.223256	1.87503	0.779359	3.90133	4.51323	-1.98101	-3.21011	-4.79754	1.67584	-0.887655	0.33913	6.90776	6.90776	-6.19997	-3.13642	0.114491	-1.20397	1.38946	0.250296	0.242021	0.471797	-0.606474	-1.54543
KEGG_ASCORBATE_AND_ALDARATE_METABOLISM	-0.801557	-0.13963	1.75968	0.138825	6.90776	4.78309	-2.54902	-6.90776	-4.173	1.73358	-1.32686	0.171085	6.90776	6.90776	-6.90776	-2.80478	0.074131	-1.3579	1.18127	0.114827	1.05177	0.935295	-0.678909	-3.33673
KEGG_BUTANOATE_METABOLISM	-0.00954541	-0.0656805	0.0181538	0	3.77213	3.77026	-2.98325	-3.38721	-0.712045	-0.130257	0.0514617	0	4.43703	5.98278	-3.90669	-6.48386	1.39659	-1.18264	1.46694	1.72059	2.67542	2.83914	-3.90923	-6.41434
KEGG_RETINOL_METABOLISM	-1.82753	-0.298824	1.42954	0.16726	6.90776	4.01107	0	-1.79204	-3.6568	0.971354	-2.71325	-1.37401	6.90776	6.90776	-3.65124	-0.90748	2.10349	-1.26961	-0.169011	-0.119685	1.84725	1.71263	0.0531898	-1.7584
KEGG_RIBOSOME	-0.86339	-0.260054	4.72516	6.90776	6.90776	0.0122649	-6.90776	-6.90776	-2.89813	6.21401	1.09536	-5.05583	6.90776	0	-6.90776	-5.93026	0.0962136	-0.535289	4.32481	0.250772	0.388903	1.24206	-6.29073	-5.86751
REACTOME_GLUCURONIDATION	-0.971566	-0.206139	2.84767	0.264421	6.90776	4.4552	-3.39977	-6.90776	-3.63826	1.85777	-1.55798	-0.311224	5.96611	4.32822	-6.29712	-3.51627	0.183707	-0.859107	1.72924	0.118558	0.742989	1.09485	-1.05518	-2.86134
REACTOME_EUKARYOTIC_TRANSLATION_ELONGATION	-0.918343	-0.501189	2.47049	6.90776	4.78438	0	-6.29176	-6.90776	-2.81516	6.84047	1.0221	-4.67825	6.90776	0	-6.90776	-4.81009	0.436151	-0.560506	4.13205	0.0856015	0.293566	1.32663	-5.21155	-5.05851
REACTOME_GAB1_SIGNALOSOME	-1.24535	-1.66031	3.16783	2.00181	0	0	0	0	-0.25466	-2.94873	1.48404	1.6301	-0.680744	-3.18907	0.692387	-0.0222354	-2.82792	-2.57547	3.92561	4.51661	-2.64121	-2.08096	-1.11712	-0.763312
REACTOME_SHC1_EVENTS_IN_EGFR_SIGNALING	-1.13575	-1.32931	3.61745	2.32266	0	0	0	0	-1.07245	-1.94261	1.27827	1.71202	-0.0707873	-4.63394	0.38556	-0.107474	-1.93254	-1.77319	3.36952	3.24097	-2.08313	-2.26905	-1.33762	-0.926745
REACTOME_TRNA_MODIFICATION_IN_THE_NUCLEUS_AND_CYTOSOL	-0.567502	-0.486117	4.61753	6.90776	0	0.00979784	-3.45109	-6.90776	-0.594117	-0.020662	3.51325	0.775399	0.0741526	-0.712656	-1.10355	-5.26077	0.882397	-0.0630037	6.90776	6.53275	-0.0674869	0.0118196	-6.90776	-6.90776
REACTOME_ACTIVATION_OF_THE_MRNA_UPON_BINDING_OF_THE_CAP_BINDING_COMPLEX_AND_EIFS_AND_SUBSEQUENT_BINDING_TO_43S	-0.511459	-0.0607165	4.70454	5.88261	1.42578	0.0126497	-6.90776	-6.90776	-1.90408	2.25857	0.804526	-0.807683	6.90776	0	-6.11481	-6.59799	-0.0303149	-1.0933	5.09057	0.88712	0.0565492	0.217746	-5.50943	-5.09487
REACTOME_MITOCHONDRIAL_FATTY_ACID_BETA_OXIDATION	0	-0.0479096	1.4196	0.227591	3.87059	1.79276	-4.55087	-5.57761	-0.291463	0.0462534	0	-0.371194	6.90776	3.61995	-2.59896	-2.63796	3.4312	-1.1829	0.866311	0.0195193	2.65823	3.80088	-3.1967	-6.90776
WP_GLUCURONIDATION	-1.04979	-0.246067	1.54071	0.0318416	4.69341	3.33182	0	-2.28888	-3.50539	1.97523	-2.36554	-0.234154	5.92838	4.29036	-4.37358	-0.876541	-0.352982	-1.63676	0.119414	-1.16636	0.557184	0.384134	0.388519	0.122089
WP_CYTOPLASMIC_RIBOSOMAL_PROTEINS	-1.65224	-0.928642	6.10849	6.90776	6.90776	2.00002e-05	-6.90776	-6.90776	-5.15422	2.87683	1.70782	-1.62166	6.90776	0	-6.90776	-4.33308	-0.55389	-1.12479	5.26504	0.558389	0.140976	1.06982	-4.69972	-4.4939
WP_PREGNANE_X_RECEPTOR_PATHWAY	-1.61314	-1.51736	5.47787	4.75105	0.217224	0.877022	-1.46041	-0.517884	-4.93108	-2.48406	1.79468	3.97114	1.74017	-2.11345	0.467319	-0.195711	-2.39699	-2.94147	4.01744	4.70772	-1.31886	-0.92806	0.00523367	-1.19938
GO_RIBOSOMAL_LARGE_SUBUNIT_ASSEMBLY	0	-0.188646	2.52833	5.20497	0.0517355	1.09476	-5.35064	-6.90776	0	0.629027	1.23787	0	1.00463	0	-2.60125	-3.23417	1.00166	-0.0119511	4.0862	3.14023	-0.0189688	0.153652	-5.21672	-4.33667
GO_NUCLEAR_TRANSCRIBED_MRNA_CATABOLIC_PROCESS_NONSENSE_MEDIATED_DECAY	-0.761512	-0.446522	4.00875	6.90776	1.52056	0.200795	-6.90776	-6.90776	-2.02951	0.759907	1.21449	0.00865737	5.74855	0	-6.90776	-2.37854	-0.415576	-0.620436	6.90776	1.49486	-0.017197	0.24239	-6.26833	-6.90776
GO_COTRANSLATIONAL_PROTEIN_TARGETING_TO_MEMBRANE	-0.593682	-0.276571	2.11321	6.90776	6.90776	0.00133089	-6.90776	-6.90776	-1.95186	6.90776	0.389523	-4.80296	6.90776	0.0235245	-6.90776	-2.53011	0.172569	-0.288002	2.37819	0.0109295	0.151114	0.738145	-2.89864	-2.66195
GO_MRNA_MODIFICATION	-0.44735	-0.581105	3.13898	1.52367	0	0.530535	-3.79611	-1.76416	-0.355205	-0.40573	0.775486	0.683652	0.16412	-0.0757478	-0.194957	-0.893869	-0.615409	-0.655639	4.73173	5.75665	0	0.0350574	-4.94862	-5.62172
GO_TRNA_METHYLATION	-0.151463	-0.0973483	3.19768	5.40566	0	0.0858085	-5.38735	-4.90519	0	0	0.96155	0.0714745	0.66945	0	-2.60916	-2.33602	1.05412	-0.112038	5.15016	3.77109	-0.00461061	0.0124876	-6.90776	-6.90776
GO_PROTEIN_TRANSMEMBRANE_IMPORT_INTO_INTRACELLULAR_ORGANELLE	-0.149289	-0.00889948	2.57396	5.45009	0	-0.0295524	-3.32546	-4.83431	-0.0795845	0.128982	1.32141	0	2.2223	0	-4.96524	-6.90776	1.37433	-0.507714	6.90776	2.70202	-0.151404	-0.023197	-6.15724	-6.90776
GO_SMALL_SUBUNIT_PROCESSOME	0	-0.000610186	3.8546	3.31176	-0.272478	1.0114	-5.35531	-6.90776	0	0	0.806316	1.46759	0	-0.0548153	-1.72749	-3.84839	1.33556	-0.101933	6.26469	6.90776	-0.79813	-0.0716786	-6.90776	-6.90776
GO_POLYSOMAL_RIBOSOME	-0.705503	-0.416546	2.03256	6.90776	0.233409	0	-3.68828	-6.90776	-1.27801	0.706395	0.70344	0.00862711	4.128	-0.530025	-2.8593	-5.35035	-1.00794	-0.133726	3.39317	1.37642	-0.169283	0	-3.12311	-2.64709
HP_NEONATAL_INSULIN_DEPENDENT_DIABETES_MELLITUS	-1.14065	-0.720395	3.11576	1.28815	-0.620882	-0.175807	0.00342586	0.00121073	-1.58304	-1.67318	1.49969	2.98442	-2.2708	-1.19415	0.825125	-0.658186	-2.10546	-1.45393	5.19865	4.30692	-0.784846	-1.52422	-1.75724	-1.60879
HP_ABNORMAL_PERISTALSIS	-0.082621	0	-1.69418	-2.39747	-3.71761	-3.58824	4.03969	4.14005	-0.0281012	-0.298905	-3.24692	-0.255925	-5.68997	-1.65642	5.22336	6.90776	-1.44672	-0.696894	-4.4716	-2.64596	-5.62627	-4.24164	6.7031	6.54367
GO_NEGATIVE_REGULATION_OF_CHONDROCYTE_DIFFERENTIATION	-0.325121	-0.0088793	-4.26542	-5.9489	-3.13032	-4.00069	6.90776	3.6436	0	0	-1.97855	0.176272	-5.69225	-3.62978	3.01298	6.90776	-0.193888	0.192311	-4.48446	-6.14709	-6.09407	-4.74838	6.90776	6.58466
KEGG_O_GLYCAN_BIOSYNTHESIS	0.0263953	0.118164	-2.50128	-3.28603	4.73993	4.99863	-1.13094	0	0.16952	2.7186	-2.62965	-3.0004	3.29462	2.005	-1.73392	-3.04858	-2.06152	-0.238727	-0.412731	-0.622651	3.1607	2.88614	-2.02261	-2.08683
WAMUNYOKOLI_OVARIAN_CANCER_LMP_UP	0.136771	0	-0.0342809	0.278669	6.90776	6.90776	-6.90776	-6.90776	0.181942	0.379037	0.774097	-0.237014	6.90776	2.72939	-6.90776	-6.90776	-1.16527	0.423792	2.53127	3.85314	6.90776	6.90776	-6.90776	-6.90776
HP_SHOULDER_DISLOCATION	0.0135615	0	-1.67478	-2.34997	-1.54183	-1.49032	4.05682	6.90776	0.447319	0.728464	-3.11292	0	-6.90776	-1.68443	4.88662	5.73568	-0.673737	-0.224807	-2.35497	-1.88942	-2.1403	-1.88598	3.66154	3.74355
HP_TRICUSPID_VALVE_PROLAPSE	0.370817	0	-3.25946	-3.23905	-2.60967	-2.60191	6.90776	3.81023	0.519328	0.902881	-2.57274	0	-4.55258	-2.46754	6.90776	5.56583	-1.22047	0.0100503	-2.29969	-3.63326	-2.65432	-2.28612	5.32159	5.40717
HOLLERN_MICROACINAR_BREAST_TUMOR_UP	1.02714	-0.211351	-1.0991	-0.453564	6.90776	3.57523	-1.77673	-1.14753	0.76518	2.30716	-0.976227	-2.142	6.90776	2.29561	-4.39143	-2.32115	0.607575	-0.348353	-0.517129	-0.303175	6.90776	4.68818	-1.82399	-3.52966
REACTOME_PROCESSIVE_SYNTHESIS_ON_THE_LAGGING_STRAND	2.72867	3.4361	0.246233	0	0	5.09477	-4.53873	-6.90776	0.91912	0.509726	0.337993	0	0.406991	0.416941	-1.79348	-6.90776	1.59268	2.33991	5.90243	3.2471	0.000590174	0.0202129	-6.90486	-6.52829
HP_JOINT_SUBLUXATION	0	0	-4.22263	-2.91583	-4.06151	-4.06226	6.90776	3.85905	1.05228	0.0920605	-3.83164	0.599329	-3.8963	-1.97235	5.39426	4.36907	-0.462067	-0.0201823	-2.88432	-3.97912	-3.78919	-4.21205	6.05007	6.03325
FARMER_BREAST_CANCER_CLUSTER_4	0	0	-6.90776	-6.90776	-6.90776	-6.90776	6.90776	6.90776	1.2271	4.34782	-6.90776	-0.819799	-6.90776	-6.90776	6.90776	6.90776	-3.09165	-0.505888	-6.90776	-6.90776	-6.90776	-6.90776	6.90776	6.90776
WP_DEREGULATION_OF_RAB_AND_RAB_EFFECTOR_GENES_IN_BLADDER_CANCER	0.634671	0.650969	-1.56384	-1.24434	6.90776	5.07796	-1.40385	-1.57055	1.34323	1.6812	-2.81958	-3.30446	6.90776	3.70225	-1.38446	-1.24071	0.291476	1.2526	-1.91535	-2.23905	6.90776	6.90776	-3.84755	-2.14413
GO_MHC_CLASS_II_PROTEIN_COMPLEX	6.90776	6.90776	-6.90776	-6.90776	-2.71852	-3.9	5.98672	3.05595	1.35468	0.456495	-3.11096	-6.90776	-2.23297	2.81631	-0.402195	4.72891	6.90776	6.90776	-6.90776	-6.90776	-2.87896	-4.62748	6.16744	6.50136
THUM_MIR21_TARGETS_HEART_DISEASE_UP	-0.0525362	-0.145477	-6.90776	-5.94001	-6.90776	-6.90776	6.90776	6.90776	1.37326	2.62382	-6.90776	-0.334285	-6.90776	-6.90776	6.90776	6.90776	-1.25134	-0.635124	-6.90776	-6.90776	-6.90776	-6.78811	6.90776	6.90776
MATHEW_FANCONI_ANEMIA_GENES	1.33184	1.85329	2.39643	0	0	4.48464	-6.39314	-6.90776	1.43649	0.684604	0.000560157	0	0.0754997	0.227792	-4.06803	-3.86815	1.4182	2.11163	3.80519	2.54369	0.0428762	0.490272	-4.7973	-4.67088
WEST_ADRENOCORTICAL_TUMOR_MARKERS_DN	-0.132846	1.24615	-5.90261	-6.33621	-2.2775	-4.27106	6.90776	6.90776	1.49973	1.68465	-6.90776	-1.92847	-6.90776	-1.70507	6.90776	6.90776	0.474462	-0.69075	-6.90776	-6.90776	-6.59441	-3.53061	6.90776	6.90776
BIOCARTA_TFF_PATHWAY	0.428386	0	-1.99084	-2.24413	3.93121	2.0393	0	0	1.7857	6.5977	-4.92188	-1.79036	5.22238	6.90776	-2.50887	-2.77006	-0.526108	-0.684287	-2.43791	-3.12897	2.41704	1.57954	0.17358	0.13598
LI_WILMS_TUMOR_ANAPLASTIC_UP	3.3611	3.04947	3.01575	0	-0.057555	5.04347	-6.90776	-6.90776	1.93725	1.88256	0	0.0889186	0.873998	0.786821	-4.21029	-6.77919	3.3896	6.90776	6.90776	4.9408	-0.0413221	0.452022	-6.90776	-6.90776
WAMUNYOKOLI_OVARIAN_CANCER_GRADES_1_2_UP	1.74423	1.0069	-0.0390839	-0.0654776	6.90776	6.90776	-6.90776	-6.90776	2.01208	2.13902	-0.356604	-1.37745	6.90776	6.90776	-6.90776	-6.90776	-0.941429	1.71502	1.44253	2.6707	6.90776	6.90776	-6.90776	-6.90776
REACTOME_DEPOSITION_OF_NEW_CENPA_CONTAINING_NUCLEOSOMES_AT_THE_CENTROMERE	2.3188	2.85063	4.69529	0	0	5.06088	-6.90776	-6.90776	2.08474	3.72891	0.272623	-1.19845	3.3198	1.64475	-6.90776	-6.90776	6.90776	6.90776	6.90776	5.1688	0.20839	1.48904	-6.90776	-6.90776
GO_ZYMOGEN_GRANULE_MEMBRANE	-0.0037972	0.737099	-0.188211	-0.744062	1.93572	3.44158	-1.57301	-3.35275	2.36679	2.19328	-3.82943	-5.23187	5.72984	3.72612	-1.43792	-4.14169	0.515704	1.21251	-0.829861	-1.11709	1.21838	1.8099	-2.07441	-3.75365
CHANG_POU5F1_TARGETS_UP	0.489929	0.394792	-6.2572	-6.90776	-3.79669	-1.28424	6.90776	6.90776	2.4204	0.925659	-6.90776	-0.340675	-6.90776	-4.08246	6.90776	6.41513	0.0281834	0.0502833	-4.75965	-5.49431	-3.53276	-4.27464	6.19618	6.27388
GO_KINETOCHORE_ORGANIZATION	3.35937	3.06001	1.5303	0	0.0479305	6.41477	-6.90776	-6.90776	2.59212	2.45161	0	-1.57595	1.3607	2.05885	-6.90776	-6.90776	2.0792	4.7533	6.31875	3.63849	0.357561	0.866453	-6.90776	-6.90776
GO_FIBRILLAR_COLLAGEN_TRIMER	0.0923565	-0.00412851	-4.473	-3.71063	-3.76853	-3.40307	6.90776	3.04291	2.8027	2.99248	-6.03233	0.0716356	-6.70506	-6.90776	6.90776	6.90776	-0.351233	0.401762	-6.90776	-6.14006	-6.03755	-5.31067	5.99583	6.58785
GO_MHC_PROTEIN_COMPLEX	6.90776	6.90776	-6.90776	-6.90776	-2.13563	-3.66771	4.07932	2.95553	2.8946	1.79306	-1.7464	-6.90776	-1.24925	2.84992	-0.98819	6.90776	6.90776	6.90776	-6.90776	-6.90776	-1.6728	-1.85298	6.90776	6.32755
JI_CARCINOGENESIS_BY_KRAS_AND_STK11_DN	0.41732	0.0441295	-6.90776	-6.90776	-5.28404	-5.96362	6.90776	5.4103	3.02753	4.4251	-6.01838	-0.377169	-6.90776	-5.90959	6.90776	6.90776	0.169674	2.01974	-6.90776	-6.68006	-6.90776	-6.74538	6.90776	6.90776
LY_AGING_MIDDLE_UP	0.997338	0.492298	-5.95533	-6.33864	-1.82753	-2.02283	5.33486	3.45131	3.19724	1.8723	-6.90776	-1.34304	-5.4503	-4.34219	5.9244	6.40686	3.83631	1.13893	-6.90776	-6.90776	-3.00872	-4.76782	6.90776	6.90776
GO_ZYMOGEN_GRANULE	0.667265	1.54173	-0.18313	-1.15983	2.11918	6.27165	-2.73792	-4.86073	3.37045	6.90776	-5.70818	-6.52481	6.90776	6.90776	-3.46321	-6.90776	1.20882	1.53898	-0.221695	-1.22081	1.22003	1.23481	-3.59605	-5.61401
BIOCARTA_MHC_PATHWAY	6.90776	6.23349	-3.15614	-4.83314	-0.154773	-0.997257	2.21604	0.809052	4.00529	1.59253	0.0174717	-6.90776	0.330798	3.03136	-2.31175	1.00874	6.90776	6.90776	-2.85023	-5.14102	-0.00878851	-0.585837	3.39314	3.54398
REACTOME_PD_1_SIGNALING	6.90776	6.90776	-6.90776	-6.90776	-3.03551	-4.09817	4.49775	2.68151	4.13485	1.43058	-6.13234	-6.90776	-1.83904	3.67837	-0.407622	4.35441	6.90776	6.90776	-6.90776	-6.90776	-1.5159	-2.58788	6.90776	6.37595
BLANCO_MELO_SARS_COV_1_INFECTION_MCR5_CELLS_UP	1.70298	2.21889	2.81266	0	-0.0151644	4.5889	-6.31902	-3.46615	4.13692	0.302958	0	-0.00163133	1.55334	0.423303	-3.8215	-6.47293	-0.179019	4.84362	6.24208	3.5427	-0.0136933	0.739275	-6.07202	-6.90776
BIOCARTA_BLYMPHOCYTE_PATHWAY	6.90776	6.90776	-6.90776	-6.90776	-3.27701	-4.74679	6.71747	4.64605	4.20807	0.204064	-2.97458	-6.90776	-4.15212	0.728609	0.560699	4.11665	6.90776	6.90776	-6.78253	-6.53474	-3.68258	-4.63425	6.90776	6.14294
GO_REGULATION_OF_NEUTROPHIL_ACTIVATION	3.89497	5.20317	-4.30344	-6.90776	-1.6847	-0.638318	3.29684	2.94576	4.83623	1.73756	-5.85596	-2.41319	-3.09299	2.17498	1.9659	1.75962	4.09079	2.43584	-3.55883	-4.21326	-0.100152	-0.0391775	2.51019	3.09145
BIOCARTA_THELPER_PATHWAY	6.90776	6.67855	-3.50589	-6.90776	-2.49183	-2.9801	4.27357	2.57487	5.26135	0.438769	-6.90776	-6.0131	-1.42812	0.58191	3.48089	6.90776	5.05719	6.90776	-5.34327	-5.97776	-3.59805	-3.29276	5.40755	4.52037
ISHIDA_E2F_TARGETS	6.90776	6.90776	5.49757	0	0	6.90776	-6.90776	-6.90776	5.28809	6.22734	0.523995	0	3.32688	3.77278	-6.90776	-6.90776	6.90776	6.90776	6.90776	6.90776	0	0.911204	-6.90776	-6.90776
BIOCARTA_NO2IL12_PATHWAY	6.90776	6.80124	-2.7184	-6.90776	0	-0.941993	1.41758	0.150451	5.75756	0.435672	-6.90776	-6.90776	0.116433	1.27827	1.27465	3.53225	4.50968	6.90776	-3.21885	-5.92452	0.218691	-0.0932782	2.27051	1.34684
BIOCARTA_CTL_PATHWAY	6.90776	6.90776	-1.95885	-6.90776	-1.15407	-2.77134	2.24121	0.779795	5.80708	3.77784	-5.86698	-6.90776	-0.423838	1.38778	0.845902	3.56783	5.1143	6.90776	-0.994198	-4.27199	-1.61325	-2.27264	4.17814	2.49177
BIOCARTA_TCRA_PATHWAY	6.90776	6.90776	-3.17841	-6.90776	-0.743683	-1.41614	3.58006	2.57487	5.82544	0.878802	-3.66084	-6.90776	-0.0447568	2.56866	-0.130735	4.66003	5.75902	6.90776	-5.42155	-6.08754	-0.145118	-1.07631	5.84723	4.13867
WATANABE_ULCERATIVE_COLITIS_WITH_CANCER_DN	6.90776	6.90776	-3.41282	-6.90776	-0.467128	-0.657105	2.01793	1.82041	6.80502	1.83646	-5.32909	-6.90776	-0.183899	0.220285	2.16195	4.79642	5.70743	6.90776	-4.59522	-6.55281	-0.537187	-0.72979	4.22277	4.37255
LY_AGING_MIDDLE_DN	3.49565	4.20044	1.10688	-0.0658407	-0.134458	6.90776	-6.35681	-6.90776	6.90776	1.7448	0	0.859178	-0.00620924	0.570664	-2.35784	-6.90776	2.8223	6.90776	6.2343	2.54464	-0.23303	0.0659262	-5.74946	-6.90776
FINETTI_BREAST_CANCER_KINOME_RED	4.31272	3.53232	3.9187	0	0	6.90776	-6.90776	-6.90776	6.90776	4.00622	0.0419581	-0.0653388	1.95454	2.3133	-6.90776	-6.90776	4.72294	6.90776	6.90776	6.60721	0	0.337012	-6.90776	-6.90776
FOURNIER_ACINAR_DEVELOPMENT_LATE_DN	4.54041	4.91488	-0.113807	-0.710436	0.604038	6.90776	-4.54182	-6.90776	6.90776	6.70196	-0.244623	-1.20304	0.116152	1.82356	-4.44076	-6.27362	3.95686	4.62235	1.71702	0.555649	0.790672	1.47155	-6.89741	-5.00232
BIOCARTA_TCYTOTOXIC_PATHWAY	6.90776	6.90776	-3.50736	-6.90776	-2.01268	-2.97803	4.27357	2.57487	6.90776	1.70155	-6.90776	-6.90776	-1.09121	0.80419	3.35161	6.90776	6.58908	6.90776	-5.34043	-6.00796	-3.20586	-3.30052	5.33652	4.52037
WATANABE_COLON_CANCER_MSI_VS_MSS_UP	6.90776	6.90776	-6.90776	-6.90776	6.90776	6.90776	0	-2.17913	6.90776	6.90776	-6.90776	-6.90776	3.07627	5.47843	-6.90776	-0.77152	6.90776	6.90776	-6.90776	-6.90776	6.90776	6.90776	0.950598	0.725608
KOINUMA_COLON_CANCER_MSI_UP	6.90776	6.90776	-6.33853	-6.32895	-0.335347	-0.730766	0.383444	0.0249897	6.90776	6.90776	-4.9097	-6.90776	-2.01711	1.67916	-1.55169	0.450342	6.90776	6.90776	-3.16335	-5.1916	-0.0747451	-0.469268	2.45968	2.40595
EGUCHI_CELL_CYCLE_RB1_TARGETS	6.90776	6.78174	2.85919	-0.333028	0	6.90776	-6.90776	-6.90776	6.90776	6.6616	0	-0.926013	3.0691	3.27471	-6.90776	-6.90776	5.10819	6.90776	6.90776	6.90776	0.00461061	2.67156	-6.90776	-6.90776
FARMER_BREAST_CANCER_CLUSTER_1	6.90776	6.90776	-6.90776	-6.90776	-0.91093	-2.74706	5.59103	3.46146	6.90776	6.90776	-6.90776	-6.90776	-0.575098	3.40777	5.68139	6.90776	6.90776	6.90776	-6.90776	-6.90776	-0.423807	-1.81088	6.90776	6.90776
FARMER_BREAST_CANCER_CLUSTER_2	3.85003	4.10895	6.90776	0.543555	0	6.90776	-6.90776	-6.90776	6.90776	6.90776	0.683236	-0.0975908	3.44757	1.47381	-6.90776	-6.90776	3.23747	6.90776	6.90776	6.90776	-0.216416	0.595077	-6.90776	-6.90776
BOWIE_RESPONSE_TO_EXTRACELLULAR_MATRIX	6.90776	6.90776	-3.36668	-4.80581	-0.241982	-2.80438	2.06546	0.146541	6.90776	6.55274	-1.12995	-6.90776	-0.777312	-0.0699183	0.00256328	2.17147	6.90776	6.90776	-1.57065	-6.08178	-0.902141	-2.79939	1.11246	2.142
BOWIE_RESPONSE_TO_TAMOXIFEN	6.90776	6.90776	-5.48895	-6.90776	-0.0420206	-1.76014	2.9883	1.04762	6.90776	5.97867	-3.06637	-6.90776	-1.03139	-0.035161	0.0371932	4.21191	6.90776	6.90776	-3.11955	-6.81399	-0.403392	-3.36552	1.46855	4.18554
ZHAN_MULTIPLE_MYELOMA_PR_UP	6.90776	6.23788	6.90776	0	0	6.90776	-6.90776	-6.90776	6.90776	6.90776	0	0	2.54341	4.1318	-6.90776	-6.90776	6.90776	6.90776	6.90776	6.90776	-0.0688679	0.703177	-6.90776	-6.90776
KANG_DOXORUBICIN_RESISTANCE_UP	6.90776	6.90776	5.44351	0	0	6.90776	-6.90776	-6.90776	6.90776	6.11219	0.0601429	0	1.3959	1.51709	-6.90776	-6.90776	6.90776	6.90776	6.90776	6.90776	-0.0482348	0.926973	-6.90776	-6.90776
MOSERLE_IFNA_RESPONSE	6.90776	6.90776	-6.90776	-6.90776	-0.289978	-3.53767	2.50967	1.04319	6.90776	6.90776	-6.90776	-6.90776	-0.271914	0.279516	0.017136	6.90776	6.90776	6.90776	-3.91754	-6.90776	-1.50328	-6.90776	2.62234	6.90776
UROSEVIC_RESPONSE_TO_IMIQUIMOD	6.90776	6.90776	-6.09146	-6.90776	-0.455375	-1.9735	2.4315	0.724906	6.90776	6.63012	-3.02471	-6.90776	-2.64739	0	-0.335109	2.50321	6.90776	6.90776	-2.53249	-6.90776	-0.955213	-3.94259	2.01216	2.82643
ANASTASSIOU_MULTICANCER_INVASIVENESS_SIGNATURE	0.412399	1.52924	-6.90776	-6.90776	-6.90776	-6.90776	6.90776	6.90776	6.90776	6.90776	-6.90776	-2.00999	-6.90776	-6.90776	6.90776	6.90776	-2.65318	2.59128	-6.90776	-6.90776	-6.90776	-6.90776	6.90776	6.90776
