# Supplementary material for: SSCS: A Stage Supervised Subtyping System for Colorectal Cancer
Source: Biomedicines. 2021 Dec 2;9(12):1815. doi: 10.3390/biomedicines9121815 (PMC8698601; doi:10.3390/biomedicines9121815)
Supplement: Supplementary file 1 [file biomedicines-09-01815-s001.zip › TableS5.xlsx]

## Sheet: Early_pre
	beta	HR (95% CI for HR)	wald.test	p.value
WFDC10B	0.55	1.7 (1.4-2.2)	23	1.5e-06
ST8SIA3	0.97	2.6 (1.8-3.9)	23	1.6e-06
CCDC114	0.4	1.5 (1.3-1.8)	22	3.1e-06
HILS1	1	2.7 (1.8-4.1)	22	3.5e-06
ACTN2	0.77	2.2 (1.6-3)	21	3.8e-06
TARS2	1.5	4.3 (2.2-8.2)	19	1.1e-05
IRF8	-0.58	0.56 (0.43-0.73)	19	1.4e-05
PGBD2	1.1	3 (1.8-5)	18	1.8e-05
GABRA1	6.8	870 (38-20000)	18	2.1e-05
SYT3	0.56	1.8 (1.4-2.3)	18	2.3e-05
NRSN1	0.62	1.9 (1.4-2.5)	17	3.6e-05
INSC	-0.36	0.7 (0.59-0.83)	17	3.8e-05
NGB	0.58	1.8 (1.3-2.4)	16	5.6e-05
TMC3	0.72	2.1 (1.4-2.9)	16	6.1e-05
INTS3	1.2	3.4 (1.9-6.2)	16	6.2e-05
CSN2	3.3	28 (5.4-140)	16	6.7e-05
HS3ST5	0.3	1.4 (1.2-1.6)	16	6.7e-05
PYDC1	2.8	17 (4.2-69)	16	7.8e-05
SOX13	0.74	2.1 (1.4-3)	16	8.2e-05
ABCA7	0.61	1.8 (1.4-2.5)	15	0.0001
GABBR1	0.46	1.6 (1.3-2)	15	0.00011
STMN4	0.67	1.9 (1.4-2.7)	15	0.00011
HCN2	0.32	1.4 (1.2-1.6)	15	0.00012
LOC100128239	0.45	1.6 (1.2-2)	15	0.00012
SALL1	-0.31	0.73 (0.63-0.86)	15	0.00012
COQ10A	0.82	2.3 (1.5-3.4)	15	0.00013
CYB5A	-0.71	0.49 (0.34-0.71)	15	0.00013
IFNGR1	-0.82	0.44 (0.29-0.67)	14	0.00014
SERPINA5	0.31	1.4 (1.2-1.6)	14	0.00017
CLK2	0.97	2.6 (1.6-4.4)	14	0.00021
HHIPL2	0.48	1.6 (1.2-2.1)	14	0.00022
TERT	0.31	1.4 (1.2-1.6)	14	0.00024
HPD	0.94	2.6 (1.5-4.3)	13	0.00026
ENO3	0.63	1.9 (1.3-2.6)	13	0.00027
CXCL14	-0.19	0.83 (0.75-0.92)	13	0.00029
UBQLNL	0.5	1.7 (1.3-2.2)	13	0.00029
FKBP6	1.4	4 (1.9-8.4)	13	0.0003
S100A1	0.28	1.3 (1.1-1.5)	13	0.0003
PLXNB3	0.25	1.3 (1.1-1.5)	13	0.00031
ATF7	1.3	3.6 (1.8-7.2)	13	0.00032
LACTB2	-0.58	0.56 (0.41-0.77)	13	0.00033
LZTS2	0.88	2.4 (1.5-3.9)	13	0.00034
SLC6A15	0.33	1.4 (1.2-1.7)	13	0.00034
FAM120C	0.52	1.7 (1.3-2.2)	13	0.00035
LOC338588	19	1.4e+08 (4700-4.2e+12)	13	0.00036
KCND1	0.5	1.7 (1.2-2.2)	12	0.00042
RAP1GAP2	0.81	2.2 (1.4-3.5)	12	0.00043
GOLGA3	1.1	2.9 (1.6-5.2)	12	0.00044
LOC100128164	1.3	3.8 (1.8-7.9)	12	0.00044
SLC24A1	0.83	2.3 (1.4-3.6)	12	0.00046
MCM4	-0.77	0.46 (0.3-0.71)	12	0.00047
EFCAB4A	0.57	1.8 (1.3-2.4)	12	0.00048
ATN1	0.71	2 (1.4-3)	12	0.00049
ADAMTSL4	0.38	1.5 (1.2-1.8)	12	0.00051
GPR135	0.45	1.6 (1.2-2)	12	0.00051
ARHGEF2	0.88	2.4 (1.5-3.9)	12	0.00053
TLE6	0.29	1.3 (1.1-1.6)	12	0.00053
CTNNA3	1.1	2.9 (1.6-5.4)	12	0.00054
TMEM81	0.74	2.1 (1.4-3.2)	12	0.00055
C1RL	0.85	2.3 (1.4-3.8)	12	0.00057
SERINC4	0.4	1.5 (1.2-1.9)	12	0.00059
ATP2B3	0.76	2.1 (1.4-3.3)	12	0.0006
SMYD1	0.26	1.3 (1.1-1.5)	12	0.00061
C6orf138	0.26	1.3 (1.1-1.5)	12	0.00063
SLC18A3	0.4	1.5 (1.2-1.9)	12	0.00064
SLC27A1	0.56	1.8 (1.3-2.4)	12	0.00064
PVRL3	-0.36	0.7 (0.57-0.86)	12	0.00065
APOF	0.51	1.7 (1.2-2.2)	12	0.00068
CLK3	1.1	3 (1.6-5.5)	11	0.0007
LRRC16B	0.38	1.5 (1.2-1.8)	11	0.00072
DCUN1D5	-0.8	0.45 (0.28-0.72)	11	0.00073
PRR4	0.45	1.6 (1.2-2)	11	0.00073
IGFN1	0.25	1.3 (1.1-1.5)	11	0.00076
MAS1L	1.7	5.4 (2-14)	11	0.00077
PCDHB14	0.5	1.6 (1.2-2.2)	11	0.00078
ALG14	-0.66	0.52 (0.35-0.76)	11	0.00081
LOC92249	0.68	2 (1.3-3)	11	0.00081
GPR26	1.7	5.5 (2-15)	11	0.00082
AMH	0.24	1.3 (1.1-1.5)	11	0.00084
ARHGEF1	0.86	2.4 (1.4-3.9)	11	0.00084
FLJ25758	0.93	2.5 (1.5-4.4)	11	0.00084
COL11A2	0.26	1.3 (1.1-1.5)	11	0.00085
DUSP5P	0.32	1.4 (1.1-1.7)	11	0.00089
LRRTM3	1.8	6 (2.1-17)	11	0.00091
SETDB1	1.2	3.4 (1.6-6.9)	11	0.00091
ADRB3	0.38	1.5 (1.2-1.8)	11	0.00092
FDX1	-0.96	0.38 (0.22-0.67)	11	0.00092
LASS1	0.38	1.5 (1.2-1.8)	11	0.00092
SEMA4C	0.62	1.9 (1.3-2.7)	11	0.00094
LOC402377	-0.47	0.62 (0.47-0.83)	11	0.001
SH3BP5L	1.1	2.9 (1.5-5.6)	11	0.001
C12orf51	0.85	2.3 (1.4-3.9)	11	0.0011
DMPK	0.57	1.8 (1.3-2.5)	11	0.0011
POGZ	0.95	2.6 (1.5-4.5)	11	0.0011
TIMP1	0.52	1.7 (1.2-2.3)	11	0.0011
CMTM5	0.65	1.9 (1.3-2.8)	11	0.0012
MOBKL2B	-0.48	0.62 (0.46-0.83)	10	0.0012
C22orf23	0.63	1.9 (1.3-2.8)	10	0.0013
DCAF8	1.4	3.9 (1.7-8.9)	10	0.0013
FDXACB1	-0.63	0.53 (0.36-0.78)	10	0.0013
POLR2A	0.63	1.9 (1.3-2.8)	10	0.0013
POP1	-0.75	0.47 (0.3-0.74)	10	0.0013
PTPRN	0.25	1.3 (1.1-1.5)	10	0.0013
RNF187	0.91	2.5 (1.4-4.4)	10	0.0013
SEC24C	1.3	3.7 (1.7-8.1)	10	0.0013
SGSM1	0.32	1.4 (1.1-1.7)	10	0.0013
GRIPAP1	0.85	2.3 (1.4-3.9)	10	0.0014
LRP1B	0.26	1.3 (1.1-1.5)	10	0.0014
C9orf4	1.4	4.2 (1.7-10)	10	0.0015
MADD	1.1	2.9 (1.5-5.6)	10	0.0015
PPP1R3E	0.58	1.8 (1.2-2.6)	10	0.0015
SLC4A3	0.26	1.3 (1.1-1.5)	10	0.0015
ARL8A	0.99	2.7 (1.5-5)	9.9	0.0016
COX6A2	20	3.5e+08 (1800-7e+13)	10	0.0016
MEMO1	-0.8	0.45 (0.27-0.74)	9.9	0.0016
PLEKHM1P	0.75	2.1 (1.3-3.4)	10	0.0016
TNRC18	0.66	1.9 (1.3-2.9)	10	0.0016
BZW2	-0.69	0.5 (0.33-0.77)	9.8	0.0017
CADM2	0.36	1.4 (1.1-1.8)	9.9	0.0017
FAM57B	0.43	1.5 (1.2-2)	9.9	0.0017
GLYATL3	0.45	1.6 (1.2-2.1)	9.8	0.0017
NR1D1	0.54	1.7 (1.2-2.4)	9.9	0.0017
PCDH9	0.32	1.4 (1.1-1.7)	9.8	0.0017
SUPT5H	0.74	2.1 (1.3-3.3)	9.8	0.0017
TXNRD2	0.75	2.1 (1.3-3.4)	9.7	0.0018
ZMYM3	0.95	2.6 (1.4-4.7)	9.8	0.0018
DPYSL5	0.49	1.6 (1.2-2.2)	9.6	0.0019
PAQR6	0.37	1.5 (1.1-1.8)	9.6	0.0019
PHF1	0.78	2.2 (1.3-3.6)	9.6	0.0019
VAMP1	0.5	1.6 (1.2-2.3)	9.7	0.0019
ALOX12B	0.31	1.4 (1.1-1.7)	9.6	0.002
C11orf73	-0.97	0.38 (0.21-0.7)	9.6	0.002
CRTC2	0.84	2.3 (1.4-4)	9.6	0.002
HTR2C	0.33	1.4 (1.1-1.7)	9.5	0.002
IFNE	0.29	1.3 (1.1-1.6)	9.6	0.002
MPZL2	-0.43	0.65 (0.49-0.85)	9.5	0.002
OS9	0.85	2.3 (1.4-4)	9.5	0.002
TCTN2	0.85	2.3 (1.4-4)	9.6	0.002
TMEM86B	0.55	1.7 (1.2-2.5)	9.6	0.002
TSPYL2	0.56	1.8 (1.2-2.5)	9.5	0.002
CCDC64	0.65	1.9 (1.3-2.9)	9.4	0.0021
GRID2	2	7.1 (2-25)	9.5	0.0021
KIAA0913	0.65	1.9 (1.3-2.9)	9.4	0.0021
LOC91948	0.51	1.7 (1.2-2.3)	9.5	0.0021
PHF21A	0.95	2.6 (1.4-4.7)	9.5	0.0021
DNASE1L3	-0.19	0.83 (0.73-0.93)	9.4	0.0022
MYH3	0.25	1.3 (1.1-1.5)	9.4	0.0022
P2RY4	0.56	1.8 (1.2-2.5)	9.4	0.0022
PPP3R2	3.6	38 (3.7-390)	9.4	0.0022
TKTL1	0.17	1.2 (1.1-1.3)	9.4	0.0022
ZNF672	0.84	2.3 (1.4-3.9)	9.4	0.0022
ACCN4	0.38	1.5 (1.1-1.9)	9.3	0.0023
AGMAT	-0.5	0.61 (0.44-0.84)	9.3	0.0023
BAI2	0.31	1.4 (1.1-1.7)	9.3	0.0023
SFRS8	1.1	3.1 (1.5-6.3)	9.3	0.0023
SV2C	0.38	1.5 (1.1-1.9)	9.3	0.0023
ZNF821	0.72	2.1 (1.3-3.3)	9.3	0.0023
NSMCE2	-0.61	0.54 (0.36-0.8)	9.2	0.0024
TACR2	0.24	1.3 (1.1-1.5)	9.2	0.0024
DDB2	0.55	1.7 (1.2-2.5)	9.2	0.0025
LIF	0.45	1.6 (1.2-2.1)	9.1	0.0025
MECP2	0.84	2.3 (1.3-4)	9.1	0.0025
NCSTN	1.2	3.2 (1.5-7)	9.2	0.0025
RTN2	0.43	1.5 (1.2-2)	9.1	0.0025
SART3	1.2	3.4 (1.5-7.4)	9.1	0.0025
ZNF618	0.34	1.4 (1.1-1.8)	9.1	0.0025
PAPL	0.31	1.4 (1.1-1.7)	9.1	0.0026
PEX2	-0.55	0.58 (0.4-0.83)	9.1	0.0026
AMELY	1.4	4.1 (1.6-10)	9	0.0027
BEAN	0.21	1.2 (1.1-1.4)	9	0.0027
GSG1L	0.94	2.6 (1.4-4.7)	9	0.0027
SLC30A2	-0.19	0.83 (0.74-0.94)	9	0.0027
ABCG2	-0.28	0.76 (0.63-0.91)	9	0.0028
GALR1	1.3	3.8 (1.6-9)	8.9	0.0028
MED18	-0.87	0.42 (0.24-0.74)	9	0.0028
MYADM	0.61	1.8 (1.2-2.8)	8.9	0.0028
NDUFC2	-0.68	0.51 (0.33-0.79)	8.9	0.0028
PCDHB15	0.32	1.4 (1.1-1.7)	8.9	0.0028
PHF12	1.1	3.1 (1.5-6.5)	8.9	0.0028
SI	-0.14	0.87 (0.79-0.95)	8.9	0.0028
TRDMT1	-0.57	0.56 (0.39-0.82)	9	0.0028
WASF1	0.35	1.4 (1.1-1.8)	8.9	0.0028
CD99L2	0.63	1.9 (1.2-2.8)	8.9	0.0029
DKFZP434L187	62	6.9e+26 (1.5e+09-3.1e+44)	8.9	0.0029
GATAD2B	0.96	2.6 (1.4-4.9)	8.9	0.0029
ODF1	64	6.2e+27 (3e+09-1.3e+46)	8.8	0.0029
ODF3L2	0.29	1.3 (1.1-1.6)	8.8	0.0029
ANXA3	-0.36	0.7 (0.55-0.88)	8.8	0.003
CLP1	-1.1	0.35 (0.17-0.7)	8.8	0.003
GCM2	5.8	340 (7.2-16000)	8.8	0.003
GOT1L1	8.3	4000 (17-960000)	8.8	0.003
GPD1	-0.2	0.82 (0.71-0.93)	8.8	0.003
IRS4	3.5	32 (3.2-320)	8.8	0.003
NCRNA00157	0.77	2.2 (1.3-3.6)	8.8	0.003
OR2A5	5.8	320 (7-14000)	8.8	0.003
PABPC1L2B	2.1	7.8 (2-31)	8.8	0.003
PAGE4	2.3	9.9 (2.2-45)	8.8	0.003
PPFIA4	0.27	1.3 (1.1-1.6)	8.8	0.003
SLC1A6	19	2.1e+08 (670-6.6e+13)	8.8	0.003
TBX22	1.8	5.9 (1.8-19)	8.8	0.003
ABCD1	0.44	1.5 (1.2-2.1)	8.7	0.0031
AVPI1	0.69	2 (1.3-3.2)	8.7	0.0031
C2orf83	13	630000 (91-4.3e+09)	8.8	0.0031
CCL27	4.3	71 (4.2-1200)	8.8	0.0031
LOC100133050	4.4	80 (4.4-1400)	8.8	0.0031
LOC648691	3.4	30 (3.1-280)	8.8	0.0031
MEPE	2	7.8 (2-30)	8.8	0.0031
OR2A2	2.7	15 (2.5-90)	8.8	0.0031
OR5K2	16	1.2e+07 (250-6.1e+11)	8.8	0.0031
TTC9C	-0.87	0.42 (0.23-0.74)	8.7	0.0031
ZNF552	-0.66	0.51 (0.33-0.8)	8.7	0.0031
ANKRD34A	0.46	1.6 (1.2-2.2)	8.7	0.0032
CRYBA4	0.37	1.5 (1.1-1.9)	8.7	0.0032
PCDH18	-0.34	0.72 (0.57-0.89)	8.7	0.0032
WNT5A	-0.33	0.72 (0.58-0.89)	8.7	0.0032
XKR4	0.59	1.8 (1.2-2.7)	8.7	0.0032
ARF3	1.1	3 (1.4-6.1)	8.6	0.0033
ARMC1	-0.51	0.6 (0.43-0.84)	8.6	0.0033
C15orf60	120	9.1e+52 (4.9e+17-1.7e+88)	8.7	0.0033
DOCK3	0.33	1.4 (1.1-1.7)	8.6	0.0033
GUSBP3	0.56	1.7 (1.2-2.5)	8.6	0.0033
OR2L13	2.1	7.8 (2-31)	8.6	0.0033
PDYN	0.51	1.7 (1.2-2.3)	8.7	0.0033
PI4K2A	0.94	2.5 (1.4-4.8)	8.6	0.0033
MPP2	0.33	1.4 (1.1-1.7)	8.6	0.0034
PUS3	-0.66	0.52 (0.33-0.8)	8.6	0.0034
SLC25A33	-0.59	0.55 (0.37-0.82)	8.6	0.0034
TRAM1	-0.45	0.64 (0.47-0.86)	8.6	0.0034
ADCY8	0.6	1.8 (1.2-2.7)	8.5	0.0035
MGC21881	0.49	1.6 (1.2-2.3)	8.6	0.0035
NSMAF	-0.85	0.43 (0.24-0.76)	8.5	0.0035
RPUSD4	-0.96	0.38 (0.2-0.73)	8.5	0.0035
SMTN	0.55	1.7 (1.2-2.5)	8.5	0.0035
TPH2	4.1	59 (3.8-900)	8.5	0.0035
WDR6	0.67	2 (1.2-3.1)	8.5	0.0035
CA11	0.37	1.4 (1.1-1.8)	8.5	0.0036
DBF4	-0.45	0.64 (0.47-0.86)	8.4	0.0037
DSCR3	-0.97	0.38 (0.2-0.73)	8.4	0.0037
KIAA0649	0.77	2.2 (1.3-3.6)	8.4	0.0037
SLC46A2	0.32	1.4 (1.1-1.7)	8.4	0.0037
CHPF	0.49	1.6 (1.2-2.3)	8.4	0.0038
HIATL1	-0.87	0.42 (0.23-0.76)	8.4	0.0038
LYPLA1	-0.4	0.67 (0.51-0.88)	8.3	0.0039
PTPN23	0.78	2.2 (1.3-3.7)	8.3	0.0039
NFATC4	0.47	1.6 (1.2-2.2)	8.3	0.004
RG9MTD2	-0.47	0.62 (0.45-0.86)	8.3	0.004
RIPK2	-0.77	0.46 (0.28-0.78)	8.3	0.004
BHLHE40	0.55	1.7 (1.2-2.5)	8.2	0.0041
NDE1	0.97	2.6 (1.4-5.1)	8.2	0.0041
POLR2D	-1.1	0.34 (0.16-0.71)	8.2	0.0041
PTMS	0.54	1.7 (1.2-2.5)	8.2	0.0041
SRRM4	0.39	1.5 (1.1-1.9)	8.2	0.0041
MRPS7	-0.91	0.4 (0.22-0.75)	8.2	0.0042
NUMBL	0.49	1.6 (1.2-2.3)	8.2	0.0042
PCDHGA4	0.31	1.4 (1.1-1.7)	8.2	0.0042
ULK1	0.6	1.8 (1.2-2.7)	8.2	0.0042
ADCYAP1R1	0.99	2.7 (1.4-5.3)	8.2	0.0043
AKR1B10	-0.16	0.85 (0.76-0.95)	8.2	0.0043
DCK	-0.54	0.58 (0.4-0.84)	8.2	0.0043
EPOR	0.39	1.5 (1.1-1.9)	8.2	0.0043
PATL2	0.31	1.4 (1.1-1.7)	8.2	0.0043
RYR2	0.23	1.3 (1.1-1.5)	8.2	0.0043
TGS1	-0.59	0.55 (0.37-0.83)	8.2	0.0043
BAG3	0.63	1.9 (1.2-2.9)	8.1	0.0044
CAMTA2	0.73	2.1 (1.3-3.4)	8.1	0.0044
FAM118B	-0.54	0.59 (0.4-0.85)	8.1	0.0044
GINS1	-0.41	0.67 (0.5-0.88)	8.1	0.0044
NEURL4	0.6	1.8 (1.2-2.8)	8.1	0.0044
PLEKHF2	-0.57	0.57 (0.38-0.84)	8.1	0.0044
RNF10	1.3	3.5 (1.5-8.3)	8.1	0.0044
ST7OT2	5	150 (4.7-4500)	8.1	0.0044
ARHGAP22	0.31	1.4 (1.1-1.7)	8.1	0.0045
C19orf54	0.75	2.1 (1.3-3.5)	8	0.0045
CPNE3	-0.59	0.56 (0.37-0.83)	8	0.0045
KIF7	0.41	1.5 (1.1-2)	8.1	0.0045
LBXCOR1	0.48	1.6 (1.2-2.2)	8.1	0.0045
LCE3A	-14000	0 (0-0)	8.1	0.0045
RPH3A	0.6	1.8 (1.2-2.8)	8.1	0.0045
SLC12A5	0.43	1.5 (1.1-2.1)	8.1	0.0045
FOXD4	0.31	1.4 (1.1-1.7)	8	0.0046
RPP38	-1.4	0.25 (0.093-0.65)	8	0.0046
SEZ6L2	0.39	1.5 (1.1-1.9)	8	0.0046
CCL28	-0.2	0.82 (0.71-0.94)	8	0.0047
GDI1	0.68	2 (1.2-3.2)	8	0.0047
JMJD5	0.86	2.4 (1.3-4.3)	8	0.0047
NDUFB6	-0.63	0.53 (0.34-0.82)	8	0.0047
ZFAND1	-0.43	0.65 (0.48-0.88)	8	0.0047
CACNA1F	0.27	1.3 (1.1-1.6)	8	0.0048
CDS1	-0.59	0.56 (0.37-0.84)	8	0.0048
TSSK4	0.39	1.5 (1.1-1.9)	8	0.0048
BID	-0.8	0.45 (0.26-0.78)	7.9	0.0049
C15orf26	0.38	1.5 (1.1-1.9)	7.9	0.0049
DLG3	0.63	1.9 (1.2-2.9)	7.9	0.0049
KCNC3	0.38	1.5 (1.1-1.9)	7.9	0.0049
NISCH	0.68	2 (1.2-3.1)	7.9	0.0049
OIT3	-0.24	0.79 (0.67-0.93)	7.9	0.0049
PCDHGA8	0.33	1.4 (1.1-1.7)	7.9	0.0049
PSD2	0.28	1.3 (1.1-1.6)	7.9	0.0049
RNF139	-0.56	0.57 (0.38-0.84)	7.9	0.0049
SLC25A45	0.59	1.8 (1.2-2.7)	7.9	0.0049
CWH43	-0.16	0.85 (0.76-0.95)	7.9	0.005
ORAI3	0.57	1.8 (1.2-2.6)	7.9	0.005
RNF215	0.55	1.7 (1.2-2.6)	7.9	0.005
LOC283314	0.39	1.5 (1.1-2)	7.8	0.0051
PCOLCE2	0.19	1.2 (1.1-1.4)	7.8	0.0051
C9orf98	0.34	1.4 (1.1-1.8)	7.8	0.0052
DDX54	0.72	2.1 (1.2-3.4)	7.8	0.0052
EPR1	-0.51	0.6 (0.42-0.86)	7.8	0.0052
SPTBN4	0.29	1.3 (1.1-1.6)	7.8	0.0052
TMEM151B	0.39	1.5 (1.1-2)	7.8	0.0052
VARS2	0.75	2.1 (1.3-3.6)	7.8	0.0052
UNC45A	0.73	2.1 (1.2-3.4)	7.8	0.0053
FLII	0.6	1.8 (1.2-2.8)	7.8	0.0054
ITLN1	-0.1	0.91 (0.84-0.97)	7.7	0.0054
LOC100132288	0.32	1.4 (1.1-1.7)	7.7	0.0054
APITD1	-0.67	0.51 (0.32-0.82)	7.7	0.0055
FOXD4L2	0.41	1.5 (1.1-2)	7.7	0.0055
NOL3	0.63	1.9 (1.2-2.9)	7.7	0.0055
ABR	0.7	2 (1.2-3.3)	7.7	0.0056
PML	0.54	1.7 (1.2-2.5)	7.7	0.0056
TAGLN3	0.28	1.3 (1.1-1.6)	7.7	0.0056
ACSBG1	0.38	1.5 (1.1-1.9)	7.6	0.0057
HTATSF1	0.66	1.9 (1.2-3.1)	7.6	0.0057
MAT1A	0.17	1.2 (1.1-1.3)	7.6	0.0057
NLGN3	0.36	1.4 (1.1-1.9)	7.6	0.0057
OSTCL	-0.38	0.69 (0.53-0.9)	7.7	0.0057
PAN2	0.67	2 (1.2-3.2)	7.6	0.0057
RNF123	0.83	2.3 (1.3-4.1)	7.7	0.0057
SMARCD1	0.97	2.7 (1.3-5.3)	7.6	0.0057
SNORA41	4.8	120 (4.1-3800)	7.6	0.0057
CNTD2	0.25	1.3 (1.1-1.5)	7.6	0.0058
CYP19A1	0.3	1.3 (1.1-1.7)	7.6	0.0058
PGM5P2	0.35	1.4 (1.1-1.8)	7.6	0.0058
TMEM165	-0.65	0.52 (0.33-0.83)	7.6	0.0058
TP53BP1	0.61	1.8 (1.2-2.9)	7.6	0.0058
ZNF362	0.58	1.8 (1.2-2.7)	7.6	0.0058
CNTN2	0.31	1.4 (1.1-1.7)	7.6	0.0059
KCTD4	0.57	1.8 (1.2-2.6)	7.6	0.0059
MRPL15	-0.52	0.6 (0.41-0.86)	7.6	0.0059
TDO2	-0.25	0.78 (0.65-0.93)	7.6	0.0059
VPS39	1.1	2.9 (1.4-6)	7.6	0.0059
HEATR7B2	0.53	1.7 (1.2-2.5)	7.5	0.006
PRPF40B	0.48	1.6 (1.1-2.3)	7.6	0.006
RAB5B	0.99	2.7 (1.3-5.4)	7.6	0.006
AARS2	0.77	2.2 (1.2-3.8)	7.5	0.0061
ACTR3	-1	0.36 (0.17-0.75)	7.5	0.0061
CHAC2	-0.35	0.71 (0.55-0.91)	7.5	0.0061
COPG	0.83	2.3 (1.3-4.1)	7.5	0.0061
PAQR5	-0.29	0.75 (0.6-0.92)	7.5	0.0061
PTPN6	0.68	2 (1.2-3.2)	7.5	0.0061
SGK2	-0.19	0.83 (0.72-0.95)	7.5	0.0061
AAAS	0.97	2.6 (1.3-5.3)	7.5	0.0062
ARMC5	0.6	1.8 (1.2-2.8)	7.5	0.0062
DHX58	0.46	1.6 (1.1-2.2)	7.5	0.0062
GOLGA2B	0.48	1.6 (1.1-2.3)	7.5	0.0063
GPR173	0.28	1.3 (1.1-1.6)	7.5	0.0063
MPP3	0.39	1.5 (1.1-1.9)	7.5	0.0063
MRPS23	-0.73	0.48 (0.29-0.81)	7.5	0.0063
NLGN1	0.39	1.5 (1.1-1.9)	7.4	0.0063
TMED5	-0.5	0.61 (0.42-0.87)	7.5	0.0063
ATXN2	0.76	2.1 (1.2-3.7)	7.4	0.0064
LOC220930	0.47	1.6 (1.1-2.2)	7.4	0.0064
NDFIP2	-0.49	0.61 (0.43-0.87)	7.4	0.0064
RBM6	0.63	1.9 (1.2-3)	7.4	0.0064
EPHA6	0.51	1.7 (1.2-2.4)	7.4	0.0065
MAL2	-0.41	0.67 (0.5-0.89)	7.4	0.0065
SEMA4B	0.43	1.5 (1.1-2.1)	7.4	0.0065
C1orf64	0.83	2.3 (1.3-4.2)	7.4	0.0066
C20orf186	0.46	1.6 (1.1-2.2)	7.4	0.0066
COX18	-0.58	0.56 (0.37-0.85)	7.4	0.0066
FABP5	-0.37	0.69 (0.53-0.9)	7.4	0.0066
FAM78B	0.35	1.4 (1.1-1.8)	7.4	0.0066
FSCN2	0.3	1.3 (1.1-1.7)	7.4	0.0066
TRIM8	0.78	2.2 (1.2-3.8)	7.4	0.0066
CIC	0.66	1.9 (1.2-3.1)	7.3	0.0067
CLEC4GP1	0.8	2.2 (1.2-4)	7.4	0.0067
FAM186B	0.46	1.6 (1.1-2.2)	7.4	0.0067
HDAC6	0.62	1.9 (1.2-2.9)	7.3	0.0067
HSPA8	-0.72	0.48 (0.29-0.82)	7.3	0.0067
SYBU	-0.29	0.75 (0.6-0.92)	7.4	0.0067
ZNF259	-0.94	0.39 (0.2-0.77)	7.4	0.0067
C17orf69	0.5	1.7 (1.1-2.4)	7.3	0.0068
CLK2P	0.57	1.8 (1.2-2.7)	7.3	0.0068
DEF6	0.59	1.8 (1.2-2.8)	7.3	0.0068
ELAVL3	0.63	1.9 (1.2-3)	7.3	0.0068
HDAC7	0.74	2.1 (1.2-3.6)	7.3	0.0068
KIAA0196	-0.45	0.64 (0.46-0.88)	7.3	0.0068
PACS1	0.66	1.9 (1.2-3.1)	7.3	0.0068
PRH2	0.46	1.6 (1.1-2.2)	7.3	0.0068
STAT6	0.92	2.5 (1.3-4.9)	7.3	0.0068
C6orf147	0.28	1.3 (1.1-1.6)	7.3	0.0069
OLFM4	-0.11	0.9 (0.83-0.97)	7.3	0.0069
ZNF204P	0.35	1.4 (1.1-1.8)	7.3	0.0069
C9orf96	0.44	1.6 (1.1-2.1)	7.3	0.007
GDF1	0.48	1.6 (1.1-2.3)	7.3	0.007
LOC440461	0.77	2.2 (1.2-3.8)	7.3	0.007
LRRC3B	1	2.7 (1.3-5.7)	7.3	0.007
MPL	0.45	1.6 (1.1-2.2)	7.3	0.007
USP11	0.57	1.8 (1.2-2.7)	7.3	0.007
DLG4	0.34	1.4 (1.1-1.8)	7.3	0.0071
LOC619207	0.3	1.3 (1.1-1.7)	7.3	0.0071
PPP1R8	-1	0.37 (0.18-0.76)	7.2	0.0071
WWC3	0.5	1.7 (1.1-2.4)	7.2	0.0071
CISD1	-0.63	0.53 (0.34-0.84)	7.2	0.0072
EID2B	0.42	1.5 (1.1-2.1)	7.2	0.0072
GBF1	0.81	2.3 (1.2-4.1)	7.2	0.0072
THAP1	-0.58	0.56 (0.37-0.85)	7.2	0.0072
TRAFD1	0.74	2.1 (1.2-3.6)	7.2	0.0072
TRPA1	-0.19	0.83 (0.72-0.95)	7.2	0.0072
UTP23	-0.46	0.63 (0.45-0.88)	7.2	0.0072
ABHD2	0.5	1.6 (1.1-2.4)	7.2	0.0073
ANKRD24	0.3	1.3 (1.1-1.7)	7.2	0.0073
CAMTA1	-0.7	0.5 (0.3-0.83)	7.2	0.0073
RCHY1	-0.6	0.55 (0.35-0.85)	7.2	0.0073
TENC1	0.45	1.6 (1.1-2.2)	7.2	0.0073
AQP2	0.47	1.6 (1.1-2.3)	7.2	0.0074
MPZL3	-0.41	0.66 (0.49-0.89)	7.2	0.0074
PRSSL1	1.3	3.6 (1.4-9.2)	7.2	0.0074
ARHGEF10	0.41	1.5 (1.1-2)	7.2	0.0075
DCAF8L1	1.8	6 (1.6-22)	7.2	0.0075
LHCGR	7.1	1200 (6.6-210000)	7.2	0.0075
LOC153910	-13000	0 (0-0)	7.2	0.0075
PARP3	0.56	1.8 (1.2-2.6)	7.1	0.0075
SGK3	-0.37	0.69 (0.52-0.91)	7.2	0.0075
EXOSC3	-0.95	0.38 (0.19-0.78)	7.1	0.0076
GDI2	-0.68	0.5 (0.3-0.83)	7.1	0.0076
TRDN	0.45	1.6 (1.1-2.2)	7.1	0.0076
ATCAY	0.41	1.5 (1.1-2)	7.1	0.0077
CAPRIN2	0.4	1.5 (1.1-2)	7.1	0.0077
RRN3P2	0.39	1.5 (1.1-2)	7.1	0.0077
FBXW8	0.94	2.5 (1.3-5.1)	7.1	0.0078
HEATR4	0.38	1.5 (1.1-1.9)	7.1	0.0078
ISCU	1.1	2.9 (1.3-6.3)	7.1	0.0078
LGI1	0.51	1.7 (1.1-2.4)	7.1	0.0078
BCOR	0.67	2 (1.2-3.2)	7.1	0.0079
BRAP	1.2	3.2 (1.4-7.4)	7	0.0079
FBXW4	0.7	2 (1.2-3.4)	7.1	0.0079
LAMB4	0.59	1.8 (1.2-2.8)	7.1	0.0079
TMEM70	-0.67	0.51 (0.31-0.84)	7	0.0079
ZFR2	0.37	1.4 (1.1-1.9)	7	0.0079
ACADL	0.42	1.5 (1.1-2.1)	7	0.008
CELF6	0.35	1.4 (1.1-1.8)	7	0.008
NR4A1	0.27	1.3 (1.1-1.6)	7	0.008
CUL7	0.65	1.9 (1.2-3.1)	7	0.0081
RBM7	-0.57	0.57 (0.37-0.86)	7	0.0081
COQ2	-0.65	0.52 (0.32-0.85)	7	0.0082
EXOC3L	0.41	1.5 (1.1-2)	7	0.0082
GUSBL1	0.54	1.7 (1.1-2.6)	7	0.0082
KLHL25	0.56	1.8 (1.2-2.7)	7	0.0082
SHANK1	0.24	1.3 (1.1-1.5)	7	0.0082
TMEM99	-0.37	0.69 (0.53-0.91)	7	0.0082
XIRP2	1.7	5.2 (1.5-18)	7	0.0082
CTNND2	0.43	1.5 (1.1-2.1)	7	0.0083
DCST2	0.32	1.4 (1.1-1.8)	7	0.0083
DOCK1	0.73	2.1 (1.2-3.6)	7	0.0083
FAM116B	0.44	1.5 (1.1-2.1)	7	0.0083
GAL	-0.14	0.87 (0.78-0.96)	7	0.0083
PSG3	6.9	990 (5.9-170000)	7	0.0083
TBC1D10B	0.8	2.2 (1.2-4)	7	0.0083
UBE3B	1.1	3.1 (1.3-7.3)	7	0.0083
FHL3	0.43	1.5 (1.1-2.1)	7	0.0084
MAP3K10	0.49	1.6 (1.1-2.4)	7	0.0084
SIX5	0.57	1.8 (1.2-2.7)	6.9	0.0084
TK2	0.75	2.1 (1.2-3.7)	7	0.0084
ZDHHC7	0.98	2.7 (1.3-5.6)	6.9	0.0084
FNDC5	0.24	1.3 (1.1-1.5)	6.9	0.0085
ITGA8	-0.24	0.79 (0.66-0.94)	6.9	0.0085
CLSTN3	0.49	1.6 (1.1-2.3)	6.9	0.0086
IER5	0.51	1.7 (1.1-2.4)	6.9	0.0086
LOC100270710	0.56	1.8 (1.2-2.7)	6.9	0.0086
USP19	0.88	2.4 (1.2-4.6)	6.9	0.0086
C17orf68	0.6	1.8 (1.2-2.8)	6.9	0.0087
CA4	-0.13	0.88 (0.8-0.97)	6.9	0.0087
CNTN6	1	2.8 (1.3-5.9)	6.9	0.0087
TMEM115	0.88	2.4 (1.2-4.7)	6.9	0.0087
TPTE2P1	0.23	1.3 (1.1-1.5)	6.9	0.0087
CACNG6	0.71	2 (1.2-3.5)	6.9	0.0088
RASGEF1C	0.41	1.5 (1.1-2)	6.9	0.0088
NR1H2	0.7	2 (1.2-3.4)	6.8	0.0089
ACCN3	0.26	1.3 (1.1-1.6)	6.8	0.009
ZNF556	0.22	1.3 (1.1-1.5)	6.8	0.009
KCNC1	0.42	1.5 (1.1-2.1)	6.8	0.0091
TBC1D8	0.45	1.6 (1.1-2.2)	6.8	0.0091
ACCSL	8.2	3600 (7.6-1700000)	6.8	0.0092
C19orf61	0.85	2.3 (1.2-4.4)	6.8	0.0092
FZD2	0.3	1.3 (1.1-1.7)	6.8	0.0092
GTF3C1	0.86	2.4 (1.2-4.5)	6.8	0.0092
TBC1D3G	0.21	1.2 (1.1-1.4)	6.8	0.0092
UBAP2L	1	2.8 (1.3-6)	6.8	0.0092
WFDC8	0.65	1.9 (1.2-3.1)	6.8	0.0092
KIAA0146	-0.88	0.42 (0.22-0.81)	6.8	0.0093
LRP5L	0.42	1.5 (1.1-2.1)	6.8	0.0093
CSMD2	0.23	1.3 (1.1-1.5)	6.7	0.0094
HIP1R	0.59	1.8 (1.2-2.8)	6.8	0.0094
INHA	0.26	1.3 (1.1-1.6)	6.8	0.0094
KCNMB3	0.48	1.6 (1.1-2.3)	6.7	0.0094
C9orf80	-0.61	0.55 (0.34-0.86)	6.7	0.0095
FAM173B	-0.63	0.53 (0.33-0.86)	6.7	0.0095
NLGN2	0.32	1.4 (1.1-1.8)	6.7	0.0095
PXN	0.69	2 (1.2-3.3)	6.7	0.0095
TMEM48	-0.45	0.64 (0.45-0.9)	6.7	0.0095
YTHDF3	-0.45	0.63 (0.45-0.89)	6.7	0.0095
GRIA2	1.9	7 (1.6-30)	6.7	0.0096
PNO1	-0.74	0.48 (0.27-0.84)	6.7	0.0096
PPAT	-0.52	0.59 (0.4-0.88)	6.7	0.0096
PPIL1	-0.65	0.52 (0.32-0.85)	6.7	0.0096
UNC5A	0.18	1.2 (1-1.4)	6.7	0.0096
AREG	-0.22	0.8 (0.68-0.95)	6.7	0.0097
ARHGEF11	0.91	2.5 (1.2-4.9)	6.7	0.0097
C2orf50	0.39	1.5 (1.1-2)	6.7	0.0097
E2F5	-0.35	0.7 (0.54-0.92)	6.7	0.0097
C9orf47	0.39	1.5 (1.1-2)	6.7	0.0098
GRIA1	0.36	1.4 (1.1-1.9)	6.7	0.0098
PKD1L3	0.26	1.3 (1.1-1.6)	6.7	0.0098
APBB3	0.48	1.6 (1.1-2.3)	6.6	0.0099
C1orf59	-0.22	0.8 (0.68-0.95)	6.6	0.0099
KDM4B	0.58	1.8 (1.1-2.8)	6.7	0.0099
LOC644145	1.1	2.9 (1.3-6.7)	6.6	0.0099
LOC678655	0.47	1.6 (1.1-2.3)	6.7	0.0099
APC2	0.27	1.3 (1.1-1.6)	6.6	0.01
C14orf142	-0.61	0.54 (0.34-0.86)	6.6	0.01
C20orf166	1.7	5.5 (1.5-20)	6.6	0.01
C20orf3	-0.53	0.59 (0.39-0.88)	6.6	0.01
CSGALNACT1	0.33	1.4 (1.1-1.8)	6.6	0.01
D4S234E	-0.19	0.82 (0.71-0.95)	6.6	0.01
DCAF5	1.1	3 (1.3-6.8)	6.6	0.01
DCTN1	0.75	2.1 (1.2-3.8)	6.6	0.01
HARS2	0.93	2.5 (1.2-5.2)	6.6	0.01
HDAC8	0.65	1.9 (1.2-3.1)	6.6	0.01
INHBB	0.19	1.2 (1-1.4)	6.6	0.01
ITGA7	0.31	1.4 (1.1-1.7)	6.6	0.01
NAV1	0.38	1.5 (1.1-2)	6.6	0.01
NOXO1	0.33	1.4 (1.1-1.8)	6.6	0.01
PDGFRA	-0.26	0.77 (0.63-0.94)	6.6	0.01
PFN2	0.25	1.3 (1.1-1.6)	6.6	0.01
PIGY	-0.75	0.47 (0.27-0.84)	6.6	0.01
PLEKHG3	0.6	1.8 (1.2-2.9)	6.6	0.01
SLC25A32	-0.54	0.58 (0.38-0.88)	6.6	0.01
SPTB	0.39	1.5 (1.1-2)	6.6	0.01
TAF1	0.57	1.8 (1.1-2.7)	6.6	0.01
TRIM41	0.79	2.2 (1.2-4)	6.6	0.01
TSPAN19	0.83	2.3 (1.2-4.4)	6.6	0.01
AKAP6	0.33	1.4 (1.1-1.8)	6.4	0.011
ATXN2L	0.58	1.8 (1.1-2.8)	6.5	0.011
C19orf76	0.33	1.4 (1.1-1.8)	6.5	0.011
CAPN3	0.29	1.3 (1.1-1.7)	6.5	0.011
CD47	-0.58	0.56 (0.36-0.87)	6.5	0.011
CNNM3	0.68	2 (1.2-3.3)	6.4	0.011
CPEB1	0.37	1.5 (1.1-1.9)	6.5	0.011
ENKUR	-0.29	0.75 (0.59-0.94)	6.4	0.011
FBXO47	1.4	3.9 (1.4-11)	6.4	0.011
GDE1	-0.72	0.48 (0.28-0.84)	6.5	0.011
GIT2	0.81	2.3 (1.2-4.2)	6.5	0.011
GSTCD	-0.54	0.59 (0.39-0.89)	6.4	0.011
JPH3	0.32	1.4 (1.1-1.7)	6.5	0.011
KAZALD1	0.42	1.5 (1.1-2.1)	6.5	0.011
KCTD20	-0.5	0.6 (0.41-0.89)	6.4	0.011
KIAA0556	0.78	2.2 (1.2-4)	6.4	0.011
KIAA1841	-0.4	0.67 (0.49-0.91)	6.5	0.011
KLC3	0.2	1.2 (1-1.4)	6.5	0.011
LOC100127888	0.21	1.2 (1-1.4)	6.4	0.011
METTL2B	-0.49	0.61 (0.42-0.89)	6.5	0.011
NPAS3	0.28	1.3 (1.1-1.7)	6.4	0.011
NPAS4	0.44	1.6 (1.1-2.2)	6.4	0.011
PCDHGB4	0.2	1.2 (1-1.4)	6.5	0.011
RILPL2	0.49	1.6 (1.1-2.4)	6.4	0.011
RTP1	3.7	42 (2.4-750)	6.5	0.011
SNAP25	0.22	1.2 (1-1.5)	6.4	0.011
TANC2	0.27	1.3 (1.1-1.6)	6.5	0.011
TMEM26	-0.31	0.74 (0.58-0.93)	6.4	0.011
TRADD	0.57	1.8 (1.1-2.7)	6.5	0.011
ZG16	-0.098	0.91 (0.84-0.98)	6.5	0.011
ZNF692	0.51	1.7 (1.1-2.5)	6.5	0.011
ADAM2	1.2	3.3 (1.3-8.2)	6.3	0.012
ADK	-0.5	0.61 (0.41-0.89)	6.4	0.012
ASAP2	0.79	2.2 (1.2-4.1)	6.4	0.012
BAHD1	0.79	2.2 (1.2-4.1)	6.4	0.012
BAZ2A	0.73	2.1 (1.2-3.7)	6.3	0.012
BTBD19	0.28	1.3 (1.1-1.6)	6.3	0.012
C17orf59	0.52	1.7 (1.1-2.5)	6.3	0.012
COPA	1	2.8 (1.3-6.4)	6.3	0.012
COPS5	-0.58	0.56 (0.36-0.88)	6.4	0.012
CPNE9	0.25	1.3 (1.1-1.6)	6.4	0.012
CYP46A1	0.52	1.7 (1.1-2.5)	6.4	0.012
DRP2	0.19	1.2 (1-1.4)	6.3	0.012
EDNRB	-0.29	0.75 (0.6-0.94)	6.3	0.012
EFCAB5	-0.37	0.69 (0.52-0.92)	6.3	0.012
EGFL8	0.4	1.5 (1.1-2)	6.3	0.012
EXTL3	0.58	1.8 (1.1-2.8)	6.3	0.012
FBRS	0.64	1.9 (1.2-3.1)	6.3	0.012
GART	-0.58	0.56 (0.36-0.88)	6.3	0.012
GNG12	-0.43	0.65 (0.47-0.91)	6.3	0.012
HAS1	0.19	1.2 (1-1.4)	6.4	0.012
HIGD1A	-0.44	0.64 (0.46-0.91)	6.3	0.012
HOXD4	0.22	1.2 (1-1.5)	6.3	0.012
MAP3K14	0.5	1.7 (1.1-2.4)	6.4	0.012
MED19	-0.72	0.49 (0.28-0.85)	6.3	0.012
MEPCE	0.8	2.2 (1.2-4.1)	6.3	0.012
MLL2	0.49	1.6 (1.1-2.4)	6.3	0.012
MRPL48	-0.61	0.54 (0.34-0.87)	6.3	0.012
MTFR1	-0.41	0.66 (0.48-0.91)	6.2	0.012
MYO1C	0.62	1.9 (1.1-3)	6.4	0.012
NARS2	-0.55	0.58 (0.38-0.88)	6.4	0.012
NDUFB5	-0.41	0.66 (0.48-0.91)	6.3	0.012
PCDHGA3	0.29	1.3 (1.1-1.7)	6.2	0.012
PCNXL2	0.57	1.8 (1.1-2.8)	6.4	0.012
PDE7A	-0.59	0.55 (0.35-0.88)	6.3	0.012
PIAS3	0.55	1.7 (1.1-2.7)	6.2	0.012
PRR3	0.75	2.1 (1.2-3.8)	6.3	0.012
PSMA5	-0.8	0.45 (0.24-0.84)	6.3	0.012
SLC25A2	0.52	1.7 (1.1-2.5)	6.4	0.012
SLC26A3	-0.096	0.91 (0.84-0.98)	6.2	0.012
SLC5A7	0.35	1.4 (1.1-1.9)	6.3	0.012
SNRNP40	-0.68	0.51 (0.3-0.86)	6.3	0.012
SRRM3	0.24	1.3 (1.1-1.5)	6.3	0.012
SYN1	0.24	1.3 (1.1-1.5)	6.3	0.012
TNIP3	-0.25	0.78 (0.64-0.95)	6.3	0.012
TXNIP	0.39	1.5 (1.1-2)	6.3	0.012
UBA7	0.45	1.6 (1.1-2.2)	6.4	0.012
ADAM29	0.55	1.7 (1.1-2.7)	6.2	0.013
ADCY6	0.61	1.8 (1.1-3)	6.1	0.013
ARNT	0.95	2.6 (1.2-5.5)	6.2	0.013
ASTN1	0.34	1.4 (1.1-1.8)	6.2	0.013
BRD2	0.96	2.6 (1.2-5.5)	6.2	0.013
CCNE2	-0.21	0.81 (0.68-0.96)	6.1	0.013
CELF4	0.3	1.4 (1.1-1.7)	6.1	0.013
CLCA1	-0.08	0.92 (0.87-0.98)	6.2	0.013
COG4	1	2.7 (1.2-6)	6.2	0.013
DAND5	0.45	1.6 (1.1-2.2)	6.2	0.013
DNAH1	0.31	1.4 (1.1-1.7)	6.2	0.013
EGR4	0.22	1.2 (1-1.5)	6.1	0.013
ETV5	0.28	1.3 (1.1-1.6)	6.1	0.013
FAM160B2	0.57	1.8 (1.1-2.8)	6.1	0.013
FAM65C	-0.26	0.77 (0.63-0.95)	6.2	0.013
FOXJ2	0.5	1.7 (1.1-2.5)	6.1	0.013
KIAA1486	0.84	2.3 (1.2-4.5)	6.2	0.013
LOC100126784	0.24	1.3 (1.1-1.5)	6.1	0.013
LOC154822	0.42	1.5 (1.1-2.1)	6.2	0.013
LOC286467	0.21	1.2 (1-1.4)	6.1	0.013
MEF2D	0.61	1.8 (1.1-3)	6.2	0.013
METTL2A	-0.57	0.57 (0.36-0.89)	6.1	0.013
MMP7	-0.16	0.85 (0.75-0.97)	6.1	0.013
MYBPC1	0.19	1.2 (1-1.4)	6.2	0.013
NLRP7	-0.29	0.75 (0.6-0.94)	6.2	0.013
OR52B4	-12000	0 (0-0)	6.1	0.013
OTUD5	0.63	1.9 (1.1-3.1)	6.2	0.013
PELP1	0.58	1.8 (1.1-2.8)	6.1	0.013
PPARGC1A	-0.21	0.81 (0.69-0.96)	6.1	0.013
PPOX	0.7	2 (1.2-3.5)	6.1	0.013
PPP1R9B	0.73	2.1 (1.2-3.7)	6.1	0.013
SDCCAG3	-0.76	0.47 (0.26-0.85)	6.2	0.013
SEL1L2	1.2	3.3 (1.3-8.6)	6.2	0.013
SLC25A13	-0.56	0.57 (0.37-0.89)	6.2	0.013
SLC5A12	0.22	1.2 (1-1.5)	6.2	0.013
SNX27	0.8	2.2 (1.2-4.1)	6.2	0.013
SNX5	-0.49	0.61 (0.41-0.9)	6.1	0.013
SRRM5	0.44	1.6 (1.1-2.2)	6.2	0.013
TFB1M	-0.63	0.53 (0.32-0.88)	6.1	0.013
TMEM14B	-0.59	0.55 (0.35-0.88)	6.2	0.013
TPMT	-0.49	0.61 (0.42-0.9)	6.2	0.013
USP20	0.68	2 (1.2-3.4)	6.1	0.013
ZBTB37	0.47	1.6 (1.1-2.3)	6.2	0.013
ZNF275	0.55	1.7 (1.1-2.7)	6.2	0.013
ZNF37B	0.43	1.5 (1.1-2.2)	6.2	0.013
ZNF768	0.65	1.9 (1.1-3.2)	6.2	0.013
ADH5	-0.74	0.48 (0.26-0.86)	6	0.014
BPIL1	0.24	1.3 (1-1.5)	6	0.014
CATSPER2	0.39	1.5 (1.1-2)	6	0.014
CBX6	0.28	1.3 (1.1-1.6)	6.1	0.014
CCDC149	0.53	1.7 (1.1-2.6)	6	0.014
CEACAM7	-0.12	0.89 (0.81-0.98)	6	0.014
CELSR1	0.32	1.4 (1.1-1.8)	6	0.014
CLEC16A	0.81	2.2 (1.2-4.3)	6	0.014
COG7	0.91	2.5 (1.2-5.2)	6.1	0.014
CORO6	0.3	1.4 (1.1-1.7)	6	0.014
DLAT	-0.64	0.53 (0.32-0.88)	6	0.014
DNAJC8	-0.74	0.48 (0.26-0.86)	6	0.014
DSCC1	-0.45	0.64 (0.45-0.91)	6	0.014
EFHC2	-0.38	0.69 (0.51-0.93)	6.1	0.014
GLT25D2	0.14	1.1 (1-1.3)	6	0.014
HMGXB3	0.85	2.3 (1.2-4.6)	6.1	0.014
KCNIP2	0.28	1.3 (1.1-1.6)	6	0.014
MIER2	0.71	2 (1.2-3.6)	6	0.014
MORC4	0.37	1.4 (1.1-1.9)	6.1	0.014
MTERFD1	-0.41	0.67 (0.48-0.92)	6.1	0.014
NDUFB9	-0.65	0.52 (0.31-0.88)	6	0.014
NGRN	0.75	2.1 (1.2-3.8)	6.1	0.014
NUDCD1	-0.41	0.66 (0.47-0.92)	6	0.014
OR10G9	1.4	4.2 (1.3-13)	6.1	0.014
OR2J3	-11000	0 (0-0)	6.1	0.014
OSTBETA	-0.16	0.85 (0.75-0.97)	6	0.014
PHF17	0.56	1.7 (1.1-2.7)	6	0.014
PI4KB	0.95	2.6 (1.2-5.6)	6	0.014
PPP2R1B	-0.58	0.56 (0.36-0.89)	6	0.014
PRRT4	0.26	1.3 (1.1-1.6)	6	0.014
PTS	-0.64	0.53 (0.32-0.88)	6.1	0.014
RNF122	0.48	1.6 (1.1-2.4)	6.1	0.014
SSX5	0.45	1.6 (1.1-2.3)	6	0.014
TATDN1	-0.35	0.7 (0.53-0.93)	6.1	0.014
TMEM40	0.2	1.2 (1-1.4)	6	0.014
TMTC2	0.53	1.7 (1.1-2.6)	6.1	0.014
TNFRSF17	-0.17	0.84 (0.73-0.97)	6	0.014
TRIP10	0.75	2.1 (1.2-3.9)	6.1	0.014
UGT2A3	-0.12	0.89 (0.81-0.98)	6	0.014
UGT2B7	-0.17	0.85 (0.74-0.97)	6.1	0.014
VAMP3	-0.57	0.56 (0.36-0.89)	6	0.014
ABCB6	0.4	1.5 (1.1-2)	5.9	0.015
AK1	0.39	1.5 (1.1-2)	5.9	0.015
ALG8	-0.55	0.58 (0.37-0.9)	6	0.015
C3orf26	-0.53	0.59 (0.39-0.9)	6	0.015
C7orf28A	-0.49	0.61 (0.41-0.91)	6	0.015
C8orf76	-0.42	0.66 (0.47-0.92)	5.9	0.015
CDHR2	-0.13	0.87 (0.78-0.97)	5.9	0.015
CHRAC1	-0.61	0.54 (0.33-0.89)	5.9	0.015
CLCA4	-0.1	0.9 (0.83-0.98)	5.9	0.015
CLCN3	-0.59	0.56 (0.35-0.89)	6	0.015
DCAF13	-0.5	0.61 (0.4-0.91)	5.9	0.015
DDAH2	0.42	1.5 (1.1-2.1)	5.9	0.015
EAF2	-0.45	0.64 (0.44-0.92)	5.9	0.015
FGFR2	0.22	1.3 (1-1.5)	5.9	0.015
FIBCD1	0.13	1.1 (1-1.3)	5.9	0.015
FICD	0.45	1.6 (1.1-2.3)	5.9	0.015
GAK	0.69	2 (1.1-3.5)	6	0.015
IQSEC1	0.6	1.8 (1.1-3)	6	0.015
LOC283267	0.67	1.9 (1.1-3.3)	5.9	0.015
MRTO4	-0.67	0.51 (0.3-0.88)	5.9	0.015
MSRA	0.54	1.7 (1.1-2.7)	5.9	0.015
NCRNA00107	0.28	1.3 (1.1-1.7)	5.9	0.015
NDUFS2	0.84	2.3 (1.2-4.6)	5.9	0.015
OBSL1	0.24	1.3 (1-1.5)	5.9	0.015
PHOX2A	0.35	1.4 (1.1-1.9)	5.9	0.015
PRX	0.38	1.5 (1.1-2)	5.9	0.015
PTPN14	0.43	1.5 (1.1-2.2)	5.9	0.015
R3HDM2	0.65	1.9 (1.1-3.2)	5.9	0.015
RAPGEF3	0.37	1.4 (1.1-1.9)	6	0.015
SLC9A5	0.31	1.4 (1.1-1.8)	5.9	0.015
SMG6	0.61	1.8 (1.1-3)	5.9	0.015
TAF1C	0.58	1.8 (1.1-2.9)	5.9	0.015
TAOK2	0.71	2 (1.1-3.6)	5.9	0.015
TFAM	-0.42	0.66 (0.47-0.92)	5.9	0.015
TLX2	0.33	1.4 (1.1-1.8)	5.9	0.015
TMEM198	0.29	1.3 (1.1-1.7)	6	0.015
TNNT1	0.12	1.1 (1-1.2)	6	0.015
TRIM46	0.33	1.4 (1.1-1.8)	5.9	0.015
YWHAQ	-0.7	0.5 (0.28-0.87)	5.9	0.015
ZC3H11A	0.73	2.1 (1.2-3.7)	6	0.015
BCAN	0.35	1.4 (1.1-1.9)	5.8	0.016
C1orf116	0.54	1.7 (1.1-2.6)	5.8	0.016
C1orf51	0.23	1.3 (1-1.5)	5.8	0.016
CDAN1	0.7	2 (1.1-3.5)	5.8	0.016
CLCF1	0.38	1.5 (1.1-2)	5.8	0.016
CPA3	-0.16	0.85 (0.75-0.97)	5.8	0.016
CRAT	0.3	1.3 (1.1-1.7)	5.8	0.016
CTDSP1	0.98	2.7 (1.2-5.9)	5.9	0.016
HSD17B11	-0.35	0.7 (0.53-0.94)	5.8	0.016
HSFX2	0.28	1.3 (1.1-1.7)	5.8	0.016
HSPB1	0.35	1.4 (1.1-1.9)	5.8	0.016
IMPA1	-0.3	0.74 (0.58-0.94)	5.8	0.016
LHX4	0.31	1.4 (1.1-1.8)	5.8	0.016
LIN28B	0.22	1.2 (1-1.5)	5.8	0.016
MACROD2	0.25	1.3 (1-1.6)	5.8	0.016
MELK	-0.39	0.68 (0.49-0.93)	5.8	0.016
MORN3	0.26	1.3 (1.1-1.6)	5.8	0.016
NANP	-0.46	0.63 (0.44-0.92)	5.8	0.016
PHLDA3	0.28	1.3 (1.1-1.7)	5.8	0.016
PRPF4	-0.83	0.43 (0.22-0.85)	5.8	0.016
SCG2	0.2	1.2 (1-1.4)	5.8	0.016
SDHB	-0.65	0.52 (0.31-0.89)	5.8	0.016
SLC6A17	0.27	1.3 (1.1-1.6)	5.8	0.016
SULT1B1	-0.15	0.86 (0.76-0.97)	5.8	0.016
SYP	0.26	1.3 (1-1.6)	5.8	0.016
SYT17	0.25	1.3 (1-1.6)	5.8	0.016
THBS3	0.38	1.5 (1.1-2)	5.8	0.016
TMEM45B	-0.41	0.67 (0.48-0.93)	5.8	0.016
UPK3BL	0.16	1.2 (1-1.3)	5.8	0.016
ZNF84	0.54	1.7 (1.1-2.7)	5.8	0.016
AGFG1	-0.83	0.44 (0.22-0.86)	5.7	0.017
ALOXE3	0.23	1.3 (1-1.5)	5.7	0.017
C1orf94	0.74	2.1 (1.1-3.8)	5.7	0.017
C6orf115	-0.46	0.63 (0.43-0.92)	5.7	0.017
DHX38	0.68	2 (1.1-3.4)	5.7	0.017
DRD4	0.27	1.3 (1.1-1.6)	5.7	0.017
ENOPH1	-0.79	0.45 (0.24-0.87)	5.7	0.017
FLJ43860	0.61	1.8 (1.1-3)	5.7	0.017
GLUL	0.54	1.7 (1.1-2.7)	5.7	0.017
GMCL1	-0.69	0.5 (0.29-0.89)	5.6	0.017
GNB5	0.4	1.5 (1.1-2.1)	5.7	0.017
HELT	-11000	0 (0-0)	5.6	0.017
HOXB4	0.28	1.3 (1.1-1.7)	5.7	0.017
HOXC13	0.25	1.3 (1-1.6)	5.7	0.017
LOC572558	0.42	1.5 (1.1-2.1)	5.7	0.017
LOC644172	0.23	1.3 (1-1.5)	5.7	0.017
LYRM1	-0.44	0.64 (0.45-0.93)	5.7	0.017
LZIC	-0.33	0.72 (0.55-0.94)	5.7	0.017
PABPN1	0.82	2.3 (1.2-4.4)	5.7	0.017
PPIAL4C	-0.55	0.57 (0.36-0.91)	5.7	0.017
RND2	0.25	1.3 (1-1.6)	5.7	0.017
SLC48A1	0.78	2.2 (1.1-4.1)	5.7	0.017
SLC4A11	0.2	1.2 (1-1.4)	5.7	0.017
SNX1	1	2.8 (1.2-6.6)	5.7	0.017
SP1	0.93	2.5 (1.2-5.5)	5.7	0.017
SRCAP	0.61	1.8 (1.1-3.1)	5.7	0.017
TLE3	0.52	1.7 (1.1-2.6)	5.7	0.017
TMEM200C	-0.29	0.75 (0.59-0.95)	5.7	0.017
TMEM68	-0.34	0.71 (0.54-0.94)	5.7	0.017
TMEM98	-0.35	0.7 (0.52-0.94)	5.7	0.017
TMPRSS9	0.49	1.6 (1.1-2.5)	5.7	0.017
UBE2CBP	-0.53	0.59 (0.38-0.91)	5.7	0.017
USP14	-0.39	0.68 (0.49-0.93)	5.7	0.017
ZW10	-0.55	0.58 (0.37-0.91)	5.7	0.017
ARSG	0.32	1.4 (1.1-1.8)	5.6	0.018
BMP5	-0.21	0.81 (0.68-0.96)	5.6	0.018
C11orf86	-0.16	0.85 (0.75-0.97)	5.6	0.018
CASQ1	0.35	1.4 (1.1-1.9)	5.6	0.018
CDH7	-1.1	0.33 (0.13-0.83)	5.6	0.018
CENPP	-0.42	0.66 (0.47-0.93)	5.6	0.018
CHD3	0.42	1.5 (1.1-2.2)	5.6	0.018
CNIH	-0.48	0.62 (0.41-0.92)	5.6	0.018
DCDC2	0.13	1.1 (1-1.3)	5.6	0.018
DCTN5	-0.89	0.41 (0.19-0.86)	5.6	0.018
FBXL8	0.35	1.4 (1.1-1.9)	5.6	0.018
GGT6	-0.16	0.85 (0.74-0.97)	5.6	0.018
INE2	0.27	1.3 (1-1.6)	5.6	0.018
KLHL8	-0.53	0.59 (0.38-0.91)	5.6	0.018
LCAT	0.34	1.4 (1.1-1.9)	5.6	0.018
LOC100170939	0.4	1.5 (1.1-2.1)	5.6	0.018
LOC642846	0.44	1.6 (1.1-2.2)	5.6	0.018
MORC2	0.81	2.2 (1.1-4.4)	5.6	0.018
NFATC2IP	0.75	2.1 (1.1-3.9)	5.6	0.018
NLRP2	-0.13	0.88 (0.79-0.98)	5.6	0.018
PCDHB12	0.26	1.3 (1-1.6)	5.6	0.018
POLG	0.62	1.9 (1.1-3.1)	5.6	0.018
PTP4A2	-0.68	0.51 (0.29-0.89)	5.6	0.018
PYGO2	1.1	2.9 (1.2-7.1)	5.6	0.018
STX1A	0.3	1.4 (1.1-1.7)	5.6	0.018
STX6	0.93	2.5 (1.2-5.5)	5.6	0.018
UTRN	0.41	1.5 (1.1-2.1)	5.6	0.018
ZNRF2	-0.51	0.6 (0.39-0.92)	5.6	0.018
ADARB2	0.29	1.3 (1.1-1.7)	5.5	0.019
ARHGAP1	0.78	2.2 (1.1-4.2)	5.5	0.019
C11orf57	-0.5	0.61 (0.4-0.92)	5.5	0.019
C11orf59	-0.78	0.46 (0.24-0.88)	5.5	0.019
CA6	0.21	1.2 (1-1.5)	5.5	0.019
CASP1	-0.25	0.78 (0.63-0.96)	5.5	0.019
CDC42	-0.44	0.64 (0.44-0.93)	5.5	0.019
DDX12	0.42	1.5 (1.1-2.2)	5.5	0.019
DMAP1	0.66	1.9 (1.1-3.3)	5.5	0.019
EDC4	0.61	1.8 (1.1-3)	5.5	0.019
ENPP7	0.39	1.5 (1.1-2.1)	5.5	0.019
GNB3	0.28	1.3 (1-1.7)	5.5	0.019
IARS	-0.61	0.54 (0.33-0.91)	5.5	0.019
INSR	0.5	1.7 (1.1-2.5)	5.5	0.019
LRRC19	-0.15	0.86 (0.77-0.98)	5.5	0.019
NBPF15	0.49	1.6 (1.1-2.5)	5.5	0.019
NEIL1	0.38	1.5 (1.1-2)	5.5	0.019
NFE2	0.17	1.2 (1-1.4)	5.5	0.019
PRKCD	0.71	2 (1.1-3.7)	5.5	0.019
PRMT3	-0.45	0.64 (0.44-0.93)	5.5	0.019
RND1	0.34	1.4 (1.1-1.9)	5.5	0.019
SLC39A8	-0.32	0.73 (0.56-0.95)	5.6	0.019
SMTNL2	-0.18	0.83 (0.72-0.97)	5.5	0.019
SYT9	0.62	1.9 (1.1-3.1)	5.5	0.019
TCEAL4	0.44	1.6 (1.1-2.3)	5.5	0.019
TOMM22	-0.66	0.52 (0.3-0.9)	5.5	0.019
ZDHHC20	-0.36	0.7 (0.52-0.94)	5.5	0.019
ZNF513	0.56	1.7 (1.1-2.8)	5.5	0.019
ACIN1	0.73	2.1 (1.1-3.9)	5.4	0.02
ACTL6A	-0.64	0.53 (0.31-0.9)	5.5	0.02
ATP6AP1	0.56	1.8 (1.1-2.8)	5.4	0.02
BCL6	0.42	1.5 (1.1-2.2)	5.4	0.02
C6orf120	-0.65	0.52 (0.3-0.9)	5.4	0.02
CASP6	-0.52	0.59 (0.38-0.92)	5.4	0.02
CHST8	0.62	1.9 (1.1-3.2)	5.4	0.02
CNPY2	0.85	2.3 (1.1-4.8)	5.4	0.02
EREG	-0.11	0.89 (0.81-0.98)	5.4	0.02
FAM189B	0.58	1.8 (1.1-2.9)	5.4	0.02
IGF1R	0.52	1.7 (1.1-2.6)	5.4	0.02
IGJ	-0.12	0.89 (0.81-0.98)	5.4	0.02
INHBC	0.99	2.7 (1.2-6.2)	5.4	0.02
KRT18	0.46	1.6 (1.1-2.3)	5.4	0.02
KTI12	-0.85	0.43 (0.21-0.88)	5.4	0.02
LCMT1	0.87	2.4 (1.1-4.9)	5.4	0.02
MTDH	-0.46	0.63 (0.43-0.93)	5.4	0.02
PCDHB17	0.49	1.6 (1.1-2.5)	5.4	0.02
PRKDC	-0.45	0.63 (0.43-0.93)	5.4	0.02
PSAT1	-0.23	0.8 (0.66-0.96)	5.4	0.02
PSORS1C1	0.21	1.2 (1-1.5)	5.4	0.02
RNF40	0.78	2.2 (1.1-4.2)	5.4	0.02
SHC2	0.23	1.3 (1-1.5)	5.4	0.02
SPRY4	0.6	1.8 (1.1-3)	5.4	0.02
SPTBN5	0.2	1.2 (1-1.4)	5.4	0.02
TBX19	0.49	1.6 (1.1-2.5)	5.4	0.02
TCTE1	-12000	0 (0-0)	5.4	0.02
TNFRSF9	-0.25	0.78 (0.63-0.96)	5.4	0.02
ZFYVE19	0.57	1.8 (1.1-2.9)	5.4	0.02
ZNF479	0.35	1.4 (1.1-1.9)	5.4	0.02
ZNF626	-0.24	0.78 (0.64-0.96)	5.4	0.02
AMPD3	0.51	1.7 (1.1-2.6)	5.4	0.021
ANKLE2	0.79	2.2 (1.1-4.4)	5.3	0.021
AP1G2	0.55	1.7 (1.1-2.8)	5.3	0.021
ASB16	0.35	1.4 (1.1-1.9)	5.3	0.021
CA1	-0.12	0.89 (0.81-0.98)	5.3	0.021
CD1C	-0.23	0.8 (0.66-0.97)	5.3	0.021
CSNK1E	0.68	2 (1.1-3.5)	5.3	0.021
DNM1P35	0.33	1.4 (1.1-1.8)	5.4	0.021
DSCAM	0.54	1.7 (1.1-2.7)	5.3	0.021
ECHDC3	-0.13	0.87 (0.78-0.98)	5.3	0.021
HIF3A	0.18	1.2 (1-1.4)	5.3	0.021
IQCF2	11000	Inf (Inf-Inf)	5.4	0.021
KCNQ2	0.25	1.3 (1-1.6)	5.3	0.021
KCTD19	0.45	1.6 (1.1-2.3)	5.4	0.021
LDB1	0.63	1.9 (1.1-3.2)	5.4	0.021
LOC285740	2.3	9.7 (1.4-66)	5.4	0.021
LOC644669	1	2.8 (1.2-6.7)	5.4	0.021
LOC90586	0.74	2.1 (1.1-3.9)	5.3	0.021
LPCAT4	0.52	1.7 (1.1-2.6)	5.3	0.021
METAP1	-0.69	0.5 (0.28-0.9)	5.4	0.021
MRPL3	-0.67	0.51 (0.29-0.9)	5.4	0.021
NCRNA00175	-11000	0 (0-0)	5.3	0.021
NPR2	0.44	1.6 (1.1-2.3)	5.3	0.021
NR4A2	0.25	1.3 (1-1.6)	5.4	0.021
NRG1	-0.22	0.81 (0.67-0.97)	5.3	0.021
PCDHGC5	0.3	1.3 (1-1.7)	5.3	0.021
PHOSPHO1	-0.24	0.79 (0.64-0.96)	5.3	0.021
PPA2	-0.55	0.58 (0.36-0.92)	5.3	0.021
PTDSS1	-0.61	0.54 (0.32-0.91)	5.3	0.021
RBM8A	0.77	2.2 (1.1-4.2)	5.4	0.021
SCAMP3	0.81	2.2 (1.1-4.5)	5.3	0.021
SFRS3	-0.59	0.55 (0.34-0.91)	5.3	0.021
SLC35F5	-0.43	0.65 (0.45-0.94)	5.3	0.021
ZNF589	0.55	1.7 (1.1-2.7)	5.3	0.021
ZNF767	0.42	1.5 (1.1-2.2)	5.3	0.021
ZNF777	0.68	2 (1.1-3.5)	5.4	0.021
ANKRD34C	0.82	2.3 (1.1-4.5)	5.2	0.022
APBB2	0.47	1.6 (1.1-2.4)	5.2	0.022
ARHGAP42	-0.36	0.7 (0.51-0.95)	5.3	0.022
ATP2A1	0.22	1.3 (1-1.5)	5.2	0.022
C12orf53	0.26	1.3 (1-1.6)	5.3	0.022
CRTC3	0.8	2.2 (1.1-4.4)	5.3	0.022
CYB5RL	-0.51	0.6 (0.39-0.93)	5.3	0.022
CYTH2	0.75	2.1 (1.1-4)	5.2	0.022
DDC	-0.15	0.86 (0.76-0.98)	5.2	0.022
DUOXA2	-0.11	0.9 (0.82-0.98)	5.3	0.022
EEF1B2	-0.55	0.58 (0.36-0.93)	5.2	0.022
GGH	-0.22	0.81 (0.67-0.97)	5.3	0.022
GPRASP1	0.28	1.3 (1-1.7)	5.2	0.022
HDC	-0.21	0.81 (0.68-0.97)	5.2	0.022
HDHD1A	-0.35	0.7 (0.52-0.95)	5.3	0.022
LRRC8A	0.42	1.5 (1.1-2.2)	5.2	0.022
MC1R	0.34	1.4 (1-1.9)	5.2	0.022
MFSD5	1	2.7 (1.2-6.4)	5.2	0.022
MRPL49	-0.62	0.54 (0.31-0.92)	5.2	0.022
MXD4	0.5	1.7 (1.1-2.5)	5.2	0.022
NPNT	-0.26	0.77 (0.62-0.96)	5.2	0.022
OPALIN	-11000	0 (0-0)	5.2	0.022
OTOF	0.18	1.2 (1-1.4)	5.3	0.022
PAQR8	-0.33	0.72 (0.54-0.95)	5.2	0.022
PHLDB3	0.47	1.6 (1.1-2.4)	5.3	0.022
PLXNA3	0.33	1.4 (1-1.8)	5.3	0.022
PPM1N	0.26	1.3 (1-1.6)	5.2	0.022
PRRT1	0.35	1.4 (1.1-1.9)	5.3	0.022
RABEP2	0.61	1.8 (1.1-3.1)	5.2	0.022
RALA	-0.62	0.54 (0.32-0.92)	5.2	0.022
REEP2	0.24	1.3 (1-1.6)	5.2	0.022
SELT	-0.64	0.53 (0.3-0.91)	5.3	0.022
SETD1A	0.56	1.7 (1.1-2.8)	5.2	0.022
SNORA66	-11000	0 (0-0)	5.3	0.022
SRGAP1	0.51	1.7 (1.1-2.6)	5.3	0.022
STX3	-0.44	0.65 (0.45-0.94)	5.2	0.022
SYNGR3	0.21	1.2 (1-1.5)	5.2	0.022
TFE3	0.58	1.8 (1.1-2.9)	5.3	0.022
TMEM195	0.15	1.2 (1-1.3)	5.3	0.022
TMEM206	-0.67	0.51 (0.29-0.91)	5.2	0.022
VKORC1L1	-0.67	0.51 (0.29-0.91)	5.2	0.022
AGPAT1	0.67	1.9 (1.1-3.5)	5.2	0.023
ANKRD49	-0.45	0.64 (0.43-0.94)	5.2	0.023
C17orf51	0.41	1.5 (1.1-2.2)	5.2	0.023
CCDC138	-0.23	0.79 (0.65-0.97)	5.2	0.023
CD1D	-0.29	0.75 (0.59-0.96)	5.1	0.023
CDRT4	0.42	1.5 (1.1-2.2)	5.2	0.023
CLEC18C	0.47	1.6 (1.1-2.4)	5.2	0.023
CLIP2	0.5	1.6 (1.1-2.5)	5.2	0.023
CUEDC1	0.47	1.6 (1.1-2.4)	5.2	0.023
DLGAP4	0.63	1.9 (1.1-3.3)	5.2	0.023
FAM92A1	-0.2	0.82 (0.7-0.97)	5.2	0.023
FGFBP3	0.32	1.4 (1-1.8)	5.2	0.023
FLJ23867	0.32	1.4 (1-1.8)	5.2	0.023
GPR123	0.77	2.2 (1.1-4.2)	5.2	0.023
HIVEP2	0.53	1.7 (1.1-2.7)	5.2	0.023
LOC284232	-0.43	0.65 (0.45-0.94)	5.2	0.023
LOC554202	0.14	1.1 (1-1.3)	5.2	0.023
MAB21L1	0.3	1.4 (1-1.8)	5.1	0.023
MARVELD1	0.49	1.6 (1.1-2.5)	5.2	0.023
MRPS18C	-0.56	0.57 (0.35-0.93)	5.2	0.023
NCRNA00115	0.39	1.5 (1.1-2.1)	5.2	0.023
OTUD7A	0.27	1.3 (1-1.6)	5.2	0.023
PDP1	-0.41	0.66 (0.46-0.94)	5.2	0.023
PTOV1	0.59	1.8 (1.1-3)	5.2	0.023
RBMS2	0.56	1.7 (1.1-2.8)	5.2	0.023
RCCD1	0.65	1.9 (1.1-3.3)	5.2	0.023
RSPH3	0.76	2.1 (1.1-4.2)	5.1	0.023
SDHAP3	0.56	1.7 (1.1-2.8)	5.2	0.023
SHANK3	0.37	1.4 (1.1-2)	5.2	0.023
TMEM38B	-0.41	0.66 (0.46-0.95)	5.2	0.023
TSPY1	-12000	0 (0-0)	5.2	0.023
UBAP1	-1	0.35 (0.14-0.87)	5.2	0.023
ZNF384	0.69	2 (1.1-3.6)	5.2	0.023
ABCA3	0.17	1.2 (1-1.4)	5.1	0.024
BAT2L2	0.62	1.9 (1.1-3.2)	5.1	0.024
BCL2L15	-0.22	0.81 (0.67-0.97)	5.1	0.024
C6orf204	0.29	1.3 (1-1.7)	5.1	0.024
CAPN13	-0.13	0.88 (0.79-0.98)	5.1	0.024
CCDC90B	-0.48	0.62 (0.41-0.94)	5.1	0.024
CCNA2	-0.4	0.67 (0.48-0.95)	5.1	0.024
COPS4	-0.52	0.6 (0.38-0.93)	5.1	0.024
CTF1	0.23	1.3 (1-1.5)	5.1	0.024
DDX11	0.46	1.6 (1.1-2.3)	5.1	0.024
ERN2	0.3	1.4 (1-1.8)	5.1	0.024
FKBP10	0.24	1.3 (1-1.6)	5.1	0.024
FLJ10038	0.58	1.8 (1.1-3)	5.1	0.024
FOXD4L1	0.28	1.3 (1-1.7)	5.1	0.024
HMMR	-0.24	0.79 (0.64-0.97)	5.1	0.024
HRASLS	0.22	1.2 (1-1.5)	5.1	0.024
KIAA0430	0.67	1.9 (1.1-3.5)	5.1	0.024
LMNA	0.51	1.7 (1.1-2.6)	5.1	0.024
MTHFSD	0.78	2.2 (1.1-4.3)	5.1	0.024
MYC	-0.39	0.68 (0.48-0.95)	5.1	0.024
PBXIP1	0.48	1.6 (1.1-2.4)	5.1	0.024
PDSS1	-0.62	0.54 (0.31-0.92)	5.1	0.024
QSOX1	0.34	1.4 (1-1.9)	5.1	0.024
RBM20	0.28	1.3 (1-1.7)	5.1	0.024
RFX1	0.48	1.6 (1.1-2.5)	5.1	0.024
SFRS1	-0.92	0.4 (0.18-0.88)	5.1	0.024
TMEM214	1	2.7 (1.1-6.5)	5.1	0.024
TRPV1	0.39	1.5 (1.1-2.1)	5.1	0.024
ZNF548	0.38	1.5 (1.1-2)	5.1	0.024
AKAP13	0.51	1.7 (1.1-2.6)	5	0.025
ALKBH5	0.69	2 (1.1-3.7)	5	0.025
APOBEC3F	0.33	1.4 (1-1.9)	5.1	0.025
C1orf77	1.1	2.9 (1.1-7.2)	5	0.025
CADPS	-0.12	0.88 (0.79-0.98)	5	0.025
CHST14	0.47	1.6 (1.1-2.4)	5	0.025
CNTROB	0.57	1.8 (1.1-2.9)	5	0.025
CYP3A43	0.69	2 (1.1-3.7)	5	0.025
EIF3H	-0.53	0.59 (0.37-0.94)	5	0.025
EPHX4	-0.18	0.84 (0.72-0.98)	5	0.025
FABP1	-0.11	0.9 (0.82-0.99)	5	0.025
FAM174A	0.52	1.7 (1.1-2.7)	5	0.025
FAM65A	0.47	1.6 (1.1-2.4)	5.1	0.025
FXR2	0.71	2 (1.1-3.7)	5	0.025
HOXA4	0.3	1.4 (1-1.8)	5	0.025
KISS1R	0.23	1.3 (1-1.5)	5	0.025
LGALS2	-0.15	0.86 (0.75-0.98)	5	0.025
LOC146880	0.55	1.7 (1.1-2.8)	5	0.025
NOS1	0.26	1.3 (1-1.6)	5	0.025
PAICS	-0.49	0.61 (0.4-0.94)	5	0.025
PCDHGA5	0.22	1.2 (1-1.5)	5	0.025
PTGR1	-0.36	0.7 (0.51-0.95)	5.1	0.025
SEC22A	-0.53	0.59 (0.37-0.94)	5	0.025
SFRS2	-0.8	0.45 (0.22-0.9)	5	0.025
SLC25A40	-0.38	0.69 (0.49-0.95)	5.1	0.025
SLC39A7	0.58	1.8 (1.1-3)	5	0.025
TAF12	-0.54	0.58 (0.37-0.93)	5	0.025
TCEB1	-0.49	0.61 (0.4-0.94)	5	0.025
TMEM126A	-0.47	0.63 (0.41-0.94)	5	0.025
TTYH2	0.32	1.4 (1-1.8)	5.1	0.025
UCA1	-0.13	0.88 (0.79-0.98)	5	0.025
WDR81	0.43	1.5 (1.1-2.2)	5	0.025
WHAMM	0.79	2.2 (1.1-4.4)	5	0.025
ZFP36	0.34	1.4 (1-1.9)	5	0.025
ZNF826	-0.28	0.76 (0.6-0.97)	5.1	0.025
ACAP3	0.4	1.5 (1-2.1)	4.9	0.026
ACTN1	0.51	1.7 (1.1-2.6)	5	0.026
BTN2A1	0.69	2 (1.1-3.7)	4.9	0.026
C5orf20	-0.24	0.78 (0.63-0.97)	4.9	0.026
EPB41L4B	-0.36	0.7 (0.51-0.96)	5	0.026
FSD1	0.22	1.3 (1-1.5)	5	0.026
GABARAPL1	0.36	1.4 (1-2)	4.9	0.026
HIRIP3	0.53	1.7 (1.1-2.7)	5	0.026
HOXA7	0.25	1.3 (1-1.6)	5	0.026
HSFY2	24	4.4e+10 (18-1e+20)	4.9	0.026
KCNH2	0.21	1.2 (1-1.5)	4.9	0.026
KCNH6	0.17	1.2 (1-1.4)	5	0.026
MBD6	0.59	1.8 (1.1-3)	5	0.026
NPFF	0.33	1.4 (1-1.9)	4.9	0.026
PAF1	0.48	1.6 (1.1-2.4)	5	0.026
PHC1	0.45	1.6 (1.1-2.3)	5	0.026
PNLIPRP3	0.59	1.8 (1.1-3)	4.9	0.026
PROCA1	0.29	1.3 (1-1.7)	5	0.026
S100A16	0.35	1.4 (1-1.9)	4.9	0.026
SKA3	-0.37	0.69 (0.5-0.96)	4.9	0.026
SPINK14	10	36000 (3.5-3.8e+08)	5	0.026
SRGAP2	0.41	1.5 (1.1-2.1)	5	0.026
STAC3	0.36	1.4 (1-2)	5	0.026
TRIM11	0.7	2 (1.1-3.7)	5	0.026
UPF0639	1.2	3.3 (1.2-9.5)	5	0.026
ZFYVE27	0.69	2 (1.1-3.6)	5	0.026
ZNF646	0.54	1.7 (1.1-2.8)	5	0.026
ZNF805	0.64	1.9 (1.1-3.3)	5	0.026
BTG2	0.36	1.4 (1-2)	4.9	0.027
C16orf70	0.91	2.5 (1.1-5.5)	4.9	0.027
CHAT	0.84	2.3 (1.1-4.9)	4.9	0.027
CTNNAL1	-0.31	0.73 (0.56-0.96)	4.9	0.027
DCAF12	-0.84	0.43 (0.2-0.91)	4.9	0.027
EIF5	-0.57	0.57 (0.34-0.94)	4.9	0.027
EMID1	-0.19	0.82 (0.69-0.98)	4.9	0.027
FBXO27	0.21	1.2 (1-1.5)	4.9	0.027
GANC	0.69	2 (1.1-3.7)	4.9	0.027
GTPBP8	-0.63	0.53 (0.3-0.93)	4.9	0.027
HEATR3	-0.6	0.55 (0.33-0.93)	4.9	0.027
HOXC6	0.12	1.1 (1-1.3)	4.9	0.027
IL22RA2	-0.29	0.75 (0.57-0.97)	4.9	0.027
IRGM	0.34	1.4 (1-1.9)	4.9	0.027
LOC143188	0.41	1.5 (1-2.2)	4.9	0.027
MED12	0.45	1.6 (1.1-2.3)	4.9	0.027
MED15	0.57	1.8 (1.1-2.9)	4.9	0.027
MYOM1	0.22	1.3 (1-1.5)	4.9	0.027
PORCN	0.41	1.5 (1-2.1)	4.9	0.027
PRKAG2	-0.52	0.59 (0.37-0.94)	4.9	0.027
PSG2	-11000	0 (0-0)	4.9	0.027
RGR	0.19	1.2 (1-1.4)	4.9	0.027
RNF138	-0.48	0.62 (0.41-0.95)	4.9	0.027
SDHD	-0.48	0.62 (0.4-0.95)	4.9	0.027
SLC31A1	-0.48	0.62 (0.41-0.95)	4.9	0.027
STRADB	-0.43	0.65 (0.45-0.95)	4.9	0.027
TMEM126B	-0.31	0.73 (0.56-0.97)	4.9	0.027
TMEM50A	-0.54	0.58 (0.36-0.94)	4.9	0.027
TTPA	-0.15	0.86 (0.75-0.98)	4.9	0.027
UBE2W	-0.34	0.71 (0.52-0.96)	4.9	0.027
WASH2P	0.48	1.6 (1.1-2.5)	4.9	0.027
XDH	-0.18	0.83 (0.71-0.98)	4.9	0.027
ZNF653	0.58	1.8 (1.1-3)	4.9	0.027
ZNF697	0.39	1.5 (1-2.1)	4.9	0.027
ZNF841	0.37	1.5 (1-2)	4.9	0.027
AP3B2	0.2	1.2 (1-1.5)	4.8	0.028
APTX	-0.71	0.49 (0.26-0.93)	4.8	0.028
CUL5	-0.44	0.65 (0.44-0.95)	4.8	0.028
EIF3CL	0.61	1.8 (1.1-3.2)	4.8	0.028
ENO2	0.24	1.3 (1-1.6)	4.8	0.028
EPB42	1.5	4.6 (1.2-18)	4.8	0.028
FAM104A	-0.98	0.37 (0.16-0.9)	4.8	0.028
FAM18A	0.36	1.4 (1-2)	4.8	0.028
FOXR1	-10000	0 (0-0)	4.8	0.028
GDF5	0.25	1.3 (1-1.6)	4.8	0.028
GNAI3	-0.57	0.57 (0.34-0.94)	4.8	0.028
HSDL2	-0.42	0.66 (0.45-0.95)	4.8	0.028
IKBKG	0.48	1.6 (1.1-2.5)	4.8	0.028
ITGA10	0.26	1.3 (1-1.6)	4.8	0.028
KCNIP3	0.24	1.3 (1-1.6)	4.8	0.028
KDM5C	0.49	1.6 (1.1-2.5)	4.8	0.028
KLRB1	-0.19	0.83 (0.7-0.98)	4.8	0.028
LPPR2	0.35	1.4 (1-1.9)	4.8	0.028
MARK4	0.62	1.9 (1.1-3.2)	4.8	0.028
MOGS	0.83	2.3 (1.1-4.8)	4.8	0.028
MYO16	0.34	1.4 (1-1.9)	4.8	0.028
NDUFAF2	-0.5	0.6 (0.39-0.95)	4.8	0.028
NECAP2	-0.68	0.51 (0.28-0.93)	4.8	0.028
PAQR3	-0.34	0.71 (0.53-0.96)	4.8	0.028
PPP1R3F	0.3	1.4 (1-1.8)	4.8	0.028
RUNDC3A	0.16	1.2 (1-1.4)	4.8	0.028
SIX4	0.19	1.2 (1-1.4)	4.8	0.028
SLC25A15	-0.52	0.6 (0.37-0.95)	4.8	0.028
TCAM1P	0.16	1.2 (1-1.3)	4.8	0.028
TMEM179B	-0.6	0.55 (0.32-0.94)	4.8	0.028
ZNF334	-0.17	0.84 (0.73-0.98)	4.8	0.028
ACPL2	-0.53	0.59 (0.37-0.95)	4.8	0.029
AKAP8L	0.7	2 (1.1-3.8)	4.8	0.029
ARAP3	0.33	1.4 (1-1.9)	4.8	0.029
ARHGEF9	0.56	1.7 (1.1-2.9)	4.7	0.029
ATP13A1	0.58	1.8 (1.1-3)	4.8	0.029
BAI1	0.25	1.3 (1-1.6)	4.8	0.029
C15orf28	0.28	1.3 (1-1.7)	4.8	0.029
DNAJC14	0.96	2.6 (1.1-6.1)	4.8	0.029
DUSP6	0.43	1.5 (1-2.3)	4.8	0.029
FAM156A	0.39	1.5 (1-2.1)	4.8	0.029
FAM171A2	0.23	1.3 (1-1.5)	4.8	0.029
FAM176A	-0.18	0.84 (0.72-0.98)	4.8	0.029
FYCO1	0.55	1.7 (1.1-2.9)	4.8	0.029
GMPR	0.2	1.2 (1-1.5)	4.7	0.029
H1FNT	10	22000 (2.7-1.8e+08)	4.8	0.029
HHAT	0.39	1.5 (1-2.1)	4.8	0.029
IER2	0.46	1.6 (1-2.4)	4.8	0.029
INPP5D	0.36	1.4 (1-2)	4.8	0.029
KDM6B	0.48	1.6 (1.1-2.5)	4.8	0.029
MS4A2	-0.18	0.84 (0.71-0.98)	4.8	0.029
MYST4	0.54	1.7 (1.1-2.8)	4.8	0.029
MYT1	0.16	1.2 (1-1.4)	4.8	0.029
NFKB2	0.41	1.5 (1-2.2)	4.8	0.029
PHRF1	0.68	2 (1.1-3.6)	4.8	0.029
PJA1	0.42	1.5 (1-2.2)	4.8	0.029
PPID	-0.42	0.66 (0.45-0.96)	4.7	0.029
PTPN18	0.69	2 (1.1-3.7)	4.8	0.029
RPS6KA1	-0.5	0.61 (0.39-0.95)	4.8	0.029
SLC35A4	0.7	2 (1.1-3.8)	4.8	0.029
SRRM2	0.55	1.7 (1.1-2.9)	4.8	0.029
STK36	0.48	1.6 (1-2.5)	4.8	0.029
STX1B	0.22	1.3 (1-1.5)	4.8	0.029
TTC39B	-0.42	0.66 (0.45-0.96)	4.8	0.029
UBA1	0.51	1.7 (1.1-2.6)	4.8	0.029
VPS33B	0.9	2.5 (1.1-5.6)	4.8	0.029
XRN2	-0.46	0.63 (0.42-0.95)	4.8	0.029
ADAR	0.66	1.9 (1.1-3.5)	4.7	0.03
ARPP21	0.7	2 (1.1-3.8)	4.7	0.03
ATAD2	-0.29	0.75 (0.58-0.97)	4.7	0.03
ATP5L	-0.62	0.54 (0.31-0.94)	4.7	0.03
C14orf177	10000	Inf (Inf-Inf)	4.7	0.03
C16orf48	0.49	1.6 (1-2.6)	4.7	0.03
C4orf36	-0.33	0.72 (0.53-0.97)	4.7	0.03
C9orf41	-0.49	0.61 (0.39-0.95)	4.7	0.03
CIT	0.47	1.6 (1-2.4)	4.7	0.03
DSTYK	0.57	1.8 (1.1-2.9)	4.7	0.03
ENY2	-0.41	0.66 (0.45-0.96)	4.7	0.03
FOXF2	-0.21	0.81 (0.67-0.98)	4.7	0.03
GTPBP1	0.69	2 (1.1-3.7)	4.7	0.03
HOXA6	0.21	1.2 (1-1.5)	4.7	0.03
HSF4	0.27	1.3 (1-1.7)	4.7	0.03
LGI2	0.24	1.3 (1-1.6)	4.7	0.03
LOC390595	0.33	1.4 (1-1.9)	4.7	0.03
LOC643955	0.4	1.5 (1-2.1)	4.7	0.03
LOC645332	-0.47	0.62 (0.41-0.96)	4.7	0.03
MAGEB18	7.6	1900 (2.1-1700000)	4.7	0.03
NAA50	-0.49	0.61 (0.4-0.95)	4.7	0.03
NCKAP5L	0.43	1.5 (1-2.3)	4.7	0.03
NCRNA00162	0.31	1.4 (1-1.8)	4.7	0.03
NR2F2	0.47	1.6 (1-2.5)	4.7	0.03
NXT1	-0.4	0.67 (0.46-0.96)	4.7	0.03
OGFR	0.47	1.6 (1-2.5)	4.7	0.03
OPA3	0.84	2.3 (1.1-5)	4.7	0.03
PCGF1	0.75	2.1 (1.1-4.2)	4.7	0.03
PHKA1	0.37	1.4 (1-2)	4.7	0.03
PIP5K1C	0.58	1.8 (1.1-3)	4.7	0.03
PPP1R1A	0.16	1.2 (1-1.4)	4.7	0.03
PRPSAP1	-0.93	0.4 (0.17-0.91)	4.7	0.03
RPA3	-0.43	0.65 (0.44-0.96)	4.7	0.03
SERPINE1	0.2	1.2 (1-1.5)	4.7	0.03
SLC25A41	0.35	1.4 (1-1.9)	4.7	0.03
SOD3	0.19	1.2 (1-1.4)	4.7	0.03
SP6	-0.2	0.82 (0.68-0.98)	4.7	0.03
SRP72	-0.46	0.63 (0.41-0.96)	4.7	0.03
TIMM8B	-0.48	0.62 (0.4-0.95)	4.7	0.03
ZBTB4	0.52	1.7 (1-2.7)	4.7	0.03
ZNF385A	0.26	1.3 (1-1.6)	4.7	0.03
ZNF597	-0.25	0.78 (0.62-0.98)	4.7	0.03
ADIPOR1	0.91	2.5 (1.1-5.7)	4.6	0.031
ATP6V0D2	-0.2	0.82 (0.69-0.98)	4.6	0.031
BAT3	0.79	2.2 (1.1-4.5)	4.7	0.031
BDKRB2	-0.35	0.71 (0.52-0.97)	4.7	0.031
C1orf204	0.29	1.3 (1-1.7)	4.6	0.031
C22orf46	0.43	1.5 (1-2.3)	4.6	0.031
C7orf51	0.24	1.3 (1-1.6)	4.7	0.031
CEBPA	-0.25	0.78 (0.62-0.98)	4.7	0.031
COIL	-0.43	0.65 (0.44-0.96)	4.6	0.031
CSH2	1.3	3.8 (1.1-13)	4.7	0.031
EP400	0.59	1.8 (1.1-3.1)	4.6	0.031
FAM183A	0.6	1.8 (1.1-3.1)	4.6	0.031
FOXP4	0.43	1.5 (1-2.3)	4.6	0.031
GON4L	0.65	1.9 (1.1-3.4)	4.7	0.031
HERC2P2	0.33	1.4 (1-1.9)	4.7	0.031
HOXC10	0.17	1.2 (1-1.4)	4.6	0.031
HOXC4	0.16	1.2 (1-1.4)	4.7	0.031
HSH2D	0.54	1.7 (1.1-2.8)	4.7	0.031
IL17RD	0.23	1.3 (1-1.5)	4.7	0.031
KLK4	0.15	1.2 (1-1.3)	4.7	0.031
KSR2	0.22	1.2 (1-1.5)	4.7	0.031
LOC653113	0.39	1.5 (1-2.1)	4.7	0.031
LYSMD4	0.52	1.7 (1-2.7)	4.6	0.031
MAFA	1	2.8 (1.1-7)	4.6	0.031
MLH1	-0.2	0.81 (0.68-0.98)	4.7	0.031
MRPL13	-0.44	0.65 (0.43-0.96)	4.6	0.031
NPTXR	0.16	1.2 (1-1.4)	4.6	0.031
PARN	0.88	2.4 (1.1-5.4)	4.6	0.031
PKD1	0.32	1.4 (1-1.9)	4.6	0.031
RAI1	0.45	1.6 (1-2.4)	4.7	0.031
RFPL3	-11000	0 (0-0)	4.7	0.031
SERPINC1	0.42	1.5 (1-2.2)	4.6	0.031
SLC7A14	0.33	1.4 (1-1.9)	4.6	0.031
SNCB	0.48	1.6 (1-2.5)	4.6	0.031
SPINT1	0.53	1.7 (1-2.7)	4.6	0.031
TMEM179	1.6	5 (1.2-21)	4.7	0.031
TXNDC12	-0.64	0.53 (0.3-0.94)	4.6	0.031
UBQLN4	0.81	2.3 (1.1-4.7)	4.6	0.031
ZNF280A	0.28	1.3 (1-1.7)	4.7	0.031
ZNF319	0.57	1.8 (1.1-3)	4.6	0.031
ACACB	0.33	1.4 (1-1.9)	4.6	0.032
APOBEC3C	0.24	1.3 (1-1.6)	4.6	0.032
BMP3	-0.15	0.86 (0.75-0.99)	4.6	0.032
C3orf38	-0.43	0.65 (0.44-0.96)	4.6	0.032
CCNA1	0.68	2 (1.1-3.6)	4.6	0.032
CD58	-0.37	0.69 (0.5-0.97)	4.6	0.032
CXADR	-0.32	0.73 (0.54-0.97)	4.6	0.032
DDX23	0.95	2.6 (1.1-6.1)	4.6	0.032
FAM120AOS	-0.6	0.55 (0.32-0.95)	4.6	0.032
FAM162A	-0.47	0.63 (0.41-0.96)	4.6	0.032
GGNBP1	11000	Inf (Inf-Inf)	4.6	0.032
IQCB1	-0.29	0.75 (0.57-0.98)	4.6	0.032
MTR	0.59	1.8 (1.1-3.1)	4.6	0.032
PCDHGC4	0.34	1.4 (1-1.9)	4.6	0.032
PNPLA7	0.24	1.3 (1-1.6)	4.6	0.032
SAFB	0.73	2.1 (1.1-4)	4.6	0.032
SFRS7	-0.88	0.41 (0.19-0.93)	4.6	0.032
SLC22A20	0.27	1.3 (1-1.7)	4.6	0.032
SPG11	0.67	2 (1.1-3.6)	4.6	0.032
STT3B	-0.41	0.66 (0.46-0.97)	4.6	0.032
TNRC6B	0.58	1.8 (1.1-3)	4.6	0.032
TRAF5	0.42	1.5 (1-2.2)	4.6	0.032
TRIM62	0.54	1.7 (1-2.8)	4.6	0.032
UPF1	0.74	2.1 (1.1-4.1)	4.6	0.032
WFS1	0.25	1.3 (1-1.6)	4.6	0.032
ABCA17P	0.17	1.2 (1-1.4)	4.5	0.033
ACSF3	0.51	1.7 (1-2.7)	4.5	0.033
ADAMTS6	0.24	1.3 (1-1.6)	4.6	0.033
BCAS3	0.45	1.6 (1-2.3)	4.6	0.033
BRP44	-0.47	0.63 (0.41-0.96)	4.6	0.033
CDC123	-0.88	0.41 (0.18-0.93)	4.6	0.033
DDX24	0.81	2.3 (1.1-4.7)	4.6	0.033
ETV6	0.63	1.9 (1.1-3.3)	4.6	0.033
GLG1	0.62	1.9 (1.1-3.3)	4.6	0.033
GPR37	0.19	1.2 (1-1.4)	4.6	0.033
JPH4	0.27	1.3 (1-1.7)	4.6	0.033
KCNH1	0.3	1.4 (1-1.8)	4.5	0.033
KCNJ14	0.34	1.4 (1-1.9)	4.5	0.033
KIAA0467	0.46	1.6 (1-2.4)	4.5	0.033
LAMB3	0.3	1.3 (1-1.8)	4.6	0.033
LMTK3	0.29	1.3 (1-1.7)	4.6	0.033
LOC645752	0.77	2.2 (1.1-4.4)	4.5	0.033
LRRC52	26	1.7e+11 (8.2-3.5e+21)	4.6	0.033
MST1R	0.39	1.5 (1-2.1)	4.5	0.033
NGFRAP1	0.24	1.3 (1-1.6)	4.6	0.033
OR4C3	10000	Inf (Inf-Inf)	4.5	0.033
PFKFB4	0.31	1.4 (1-1.8)	4.5	0.033
PRPF8	0.49	1.6 (1-2.6)	4.5	0.033
RRM2	-0.4	0.67 (0.47-0.97)	4.5	0.033
SFI1	0.56	1.7 (1-2.9)	4.6	0.033
SGMS1	-0.47	0.63 (0.41-0.96)	4.5	0.033
SLC4A4	-0.12	0.89 (0.8-0.99)	4.6	0.033
ACE	0.32	1.4 (1-1.8)	4.5	0.034
AK3	-0.44	0.64 (0.43-0.97)	4.5	0.034
BTRC	0.81	2.2 (1.1-4.7)	4.5	0.034
C1orf35	0.61	1.8 (1-3.2)	4.5	0.034
C8orf40	-0.36	0.7 (0.5-0.97)	4.5	0.034
CAPN6	0.1	1.1 (1-1.2)	4.5	0.034
CDK5RAP3	0.51	1.7 (1-2.7)	4.5	0.034
DIAPH3	-0.36	0.69 (0.5-0.97)	4.5	0.034
FABP2	-0.11	0.9 (0.81-0.99)	4.5	0.034
FCHO1	0.26	1.3 (1-1.6)	4.5	0.034
FSCN1	0.19	1.2 (1-1.5)	4.5	0.034
GPR160	-0.24	0.79 (0.63-0.98)	4.5	0.034
GPR45	0.4	1.5 (1-2.2)	4.5	0.034
HMGXB4	-0.38	0.68 (0.48-0.97)	4.5	0.034
HUWE1	0.43	1.5 (1-2.3)	4.5	0.034
KCNE1	0.27	1.3 (1-1.7)	4.5	0.034
KCTD1	0.27	1.3 (1-1.7)	4.5	0.034
LOC92659	-0.36	0.69 (0.5-0.97)	4.5	0.034
LYN	-0.42	0.66 (0.45-0.97)	4.5	0.034
MID1IP1	0.42	1.5 (1-2.2)	4.5	0.034
MORN4	0.47	1.6 (1-2.4)	4.5	0.034
OGFOD2	0.52	1.7 (1-2.7)	4.5	0.034
OR4K5	-10000	0 (0-0)	4.5	0.034
PHOX2B	0.31	1.4 (1-1.8)	4.5	0.034
POLM	0.55	1.7 (1-2.9)	4.5	0.034
PRKRIR	-0.35	0.71 (0.51-0.97)	4.5	0.034
PYCR2	0.59	1.8 (1-3.1)	4.5	0.034
SCOC	-0.29	0.75 (0.58-0.98)	4.5	0.034
SETD1B	0.59	1.8 (1-3.1)	4.5	0.034
SF3B4	0.67	2 (1.1-3.6)	4.5	0.034
SMPDL3B	-0.37	0.69 (0.49-0.97)	4.5	0.034
TMX2	-0.65	0.52 (0.29-0.95)	4.5	0.034
ZNF207	-1	0.36 (0.14-0.92)	4.5	0.034
ACADVL	0.51	1.7 (1-2.7)	4.4	0.035
AMIGO3	0.36	1.4 (1-2)	4.4	0.035
ATF7IP	0.54	1.7 (1-2.9)	4.5	0.035
C10orf129	14	970000 (2.6-3.6e+11)	4.4	0.035
C17orf65	0.49	1.6 (1-2.6)	4.4	0.035
C2orf81	0.39	1.5 (1-2.1)	4.4	0.035
C5orf46	0.15	1.2 (1-1.3)	4.4	0.035
C8orf45	-0.17	0.84 (0.72-0.99)	4.4	0.035
CLEC2A	0.21	1.2 (1-1.5)	4.4	0.035
CLIP1	0.63	1.9 (1-3.3)	4.5	0.035
CLLU1	0.21	1.2 (1-1.5)	4.4	0.035
CUL9	0.5	1.6 (1-2.6)	4.5	0.035
DERL1	-0.66	0.52 (0.28-0.95)	4.4	0.035
DUOX2	-0.1	0.9 (0.82-0.99)	4.4	0.035
HN1	-0.59	0.55 (0.32-0.96)	4.4	0.035
HSPA4L	0.16	1.2 (1-1.4)	4.5	0.035
ICT1	-0.53	0.59 (0.36-0.96)	4.4	0.035
LOC200030	0.54	1.7 (1-2.9)	4.4	0.035
MRPL11	-0.54	0.58 (0.35-0.96)	4.4	0.035
MTHFD2L	-0.32	0.72 (0.54-0.98)	4.4	0.035
PYGO1	0.25	1.3 (1-1.6)	4.4	0.035
SDHAF2	-0.84	0.43 (0.2-0.94)	4.5	0.035
SEZ6L	0.2	1.2 (1-1.5)	4.4	0.035
SH3BP4	0.49	1.6 (1-2.6)	4.5	0.035
SHQ1	-0.64	0.53 (0.29-0.96)	4.4	0.035
SYNPR	0.13	1.1 (1-1.3)	4.5	0.035
TECTA	0.29	1.3 (1-1.7)	4.4	0.035
TMEFF2	0.54	1.7 (1-2.8)	4.4	0.035
TMEM229B	0.29	1.3 (1-1.7)	4.5	0.035
TMEM50B	-0.42	0.66 (0.45-0.97)	4.5	0.035
TTLL11	0.6	1.8 (1-3.2)	4.5	0.035
ZER1	0.6	1.8 (1-3.2)	4.4	0.035
ARID5A	0.43	1.5 (1-2.3)	4.4	0.036
C20orf199	-0.36	0.7 (0.5-0.98)	4.4	0.036
CDIPT	0.64	1.9 (1-3.5)	4.4	0.036
CDK16	0.41	1.5 (1-2.2)	4.4	0.036
DEFB1	-0.14	0.87 (0.76-0.99)	4.4	0.036
DNAJC12	0.18	1.2 (1-1.4)	4.4	0.036
F8A1	0.38	1.5 (1-2.1)	4.4	0.036
FADD	-0.75	0.47 (0.24-0.95)	4.4	0.036
GMNN	-0.4	0.67 (0.47-0.97)	4.4	0.036
GPS2	0.58	1.8 (1-3.1)	4.4	0.036
HSPA1A	0.3	1.4 (1-1.8)	4.4	0.036
KLC2	0.44	1.5 (1-2.3)	4.4	0.036
KLHL29	0.31	1.4 (1-1.8)	4.4	0.036
KRI1	0.63	1.9 (1-3.4)	4.4	0.036
LOC100130015	0.25	1.3 (1-1.6)	4.4	0.036
LOC441454	0.24	1.3 (1-1.6)	4.4	0.036
MLX	-0.66	0.52 (0.28-0.96)	4.4	0.036
PHKG1	0.23	1.3 (1-1.6)	4.4	0.036
POMT2	0.54	1.7 (1-2.9)	4.4	0.036
PRH1	0.42	1.5 (1-2.2)	4.4	0.036
PRR12	0.54	1.7 (1-2.8)	4.4	0.036
RILPL1	0.41	1.5 (1-2.2)	4.4	0.036
ROBO3	0.24	1.3 (1-1.6)	4.4	0.036
SEC14L4	0.15	1.2 (1-1.3)	4.4	0.036
SENP8	-0.32	0.73 (0.54-0.98)	4.4	0.036
SGK494	0.37	1.5 (1-2.1)	4.4	0.036
SMARCC2	0.77	2.2 (1.1-4.4)	4.4	0.036
SOX2	0.088	1.1 (1-1.2)	4.4	0.036
STXBP1	0.26	1.3 (1-1.7)	4.4	0.036
TMEM199	-0.62	0.54 (0.3-0.96)	4.4	0.036
TNFSF11	-0.17	0.84 (0.72-0.99)	4.4	0.036
TOX2	0.25	1.3 (1-1.6)	4.4	0.036
TREX1	0.36	1.4 (1-2)	4.4	0.036
WNK1	0.45	1.6 (1-2.4)	4.4	0.036
ZNF160	0.51	1.7 (1-2.7)	4.4	0.036
AGER	0.28	1.3 (1-1.7)	4.3	0.037
AHNAK2	0.18	1.2 (1-1.4)	4.4	0.037
AMTN	10	22000 (1.9-2.6e+08)	4.4	0.037
AQP11	-0.4	0.67 (0.46-0.98)	4.4	0.037
ARHGEF4	0.16	1.2 (1-1.4)	4.4	0.037
C13orf34	-0.42	0.66 (0.45-0.98)	4.3	0.037
CCDC92	0.47	1.6 (1-2.5)	4.4	0.037
CCL22	-0.21	0.81 (0.67-0.99)	4.4	0.037
CLEC3A	0.28	1.3 (1-1.7)	4.4	0.037
DHRS1	0.39	1.5 (1-2.1)	4.3	0.037
DR1	-0.4	0.67 (0.46-0.98)	4.4	0.037
EDIL3	-0.18	0.83 (0.7-0.99)	4.3	0.037
GPN1	-0.54	0.58 (0.35-0.97)	4.4	0.037
GRIN2C	0.16	1.2 (1-1.4)	4.3	0.037
HNF4G	-0.25	0.78 (0.61-0.98)	4.4	0.037
IFT140	0.41	1.5 (1-2.2)	4.3	0.037
ILDR2	0.25	1.3 (1-1.6)	4.3	0.037
INO80	0.69	2 (1-3.8)	4.3	0.037
KRTAP9_8	-10000	0 (0-1.1e-271)	4.4	0.037
LAMB2L	0.28	1.3 (1-1.7)	4.4	0.037
MGC16025	0.43	1.5 (1-2.3)	4.3	0.037
MINA	-0.59	0.55 (0.32-0.96)	4.4	0.037
NIP7	-0.51	0.6 (0.38-0.97)	4.4	0.037
NR1I3	0.27	1.3 (1-1.7)	4.3	0.037
NUDT5	-0.7	0.49 (0.26-0.96)	4.4	0.037
PAK1	-0.62	0.54 (0.3-0.96)	4.3	0.037
PRSS16	0.48	1.6 (1-2.6)	4.3	0.037
RAB35	0.75	2.1 (1-4.3)	4.4	0.037
RNF207	0.24	1.3 (1-1.6)	4.4	0.037
SCN10A	-10000	0 (0-1.2e-275)	4.4	0.037
SIKE1	-0.6	0.55 (0.31-0.97)	4.3	0.037
SLC9A6	0.57	1.8 (1-3)	4.4	0.037
SYVN1	0.62	1.9 (1-3.4)	4.4	0.037
TMEM205	0.51	1.7 (1-2.7)	4.3	0.037
TXNDC6	0.36	1.4 (1-2)	4.4	0.037
UROS	-0.63	0.54 (0.3-0.96)	4.4	0.037
ZNF438	0.56	1.8 (1-3)	4.4	0.037
ATP6V1G2	0.29	1.3 (1-1.8)	4.3	0.038
CKS2	-0.42	0.66 (0.44-0.98)	4.3	0.038
CLCN4	0.24	1.3 (1-1.6)	4.3	0.038
CMC1	-0.45	0.64 (0.42-0.98)	4.3	0.038
CREBBP	0.51	1.7 (1-2.7)	4.3	0.038
CSRP1	0.46	1.6 (1-2.5)	4.3	0.038
DIO2	-0.22	0.8 (0.65-0.99)	4.3	0.038
DISP1	0.44	1.5 (1-2.3)	4.3	0.038
EBF4	0.24	1.3 (1-1.6)	4.3	0.038
FBXO21	0.82	2.3 (1-5)	4.3	0.038
HOXC5	0.17	1.2 (1-1.4)	4.3	0.038
IGSF21	0.21	1.2 (1-1.5)	4.3	0.038
KLHL26	0.47	1.6 (1-2.5)	4.3	0.038
LTBR	0.49	1.6 (1-2.6)	4.3	0.038
MAGI2	0.31	1.4 (1-1.8)	4.3	0.038
MCHR1	0.24	1.3 (1-1.6)	4.3	0.038
OR52B2	-9500	0 (0-7.1e-236)	4.3	0.038
PCDHB11	0.19	1.2 (1-1.4)	4.3	0.038
PNPLA2	0.39	1.5 (1-2.1)	4.3	0.038
RNF31	0.6	1.8 (1-3.2)	4.3	0.038
S100A4	0.24	1.3 (1-1.6)	4.3	0.038
TJP1	0.58	1.8 (1-3.1)	4.3	0.038
TPD52	-0.32	0.73 (0.54-0.98)	4.3	0.038
UBE2Q1	0.9	2.5 (1.1-5.8)	4.3	0.038
ZBTB20	0.39	1.5 (1-2.1)	4.3	0.038
AASDHPPT	-0.49	0.61 (0.39-0.98)	4.3	0.039
ACOT1	0.38	1.5 (1-2.1)	4.2	0.039
ADCY4	0.32	1.4 (1-1.9)	4.2	0.039
BOLA3	-0.46	0.63 (0.41-0.98)	4.3	0.039
CXorf66	10000	Inf (7.7e+214-Inf)	4.2	0.039
DOK4	-0.38	0.68 (0.48-0.98)	4.3	0.039
EML6	0.26	1.3 (1-1.6)	4.3	0.039
GPR133	0.17	1.2 (1-1.4)	4.3	0.039
GRSF1	-0.51	0.6 (0.37-0.97)	4.3	0.039
HAAO	-0.17	0.84 (0.72-0.99)	4.2	0.039
ISCA1	-0.45	0.64 (0.42-0.98)	4.2	0.039
ISCA1P1	-0.38	0.68 (0.48-0.98)	4.3	0.039
ITGA4	-0.23	0.79 (0.64-0.99)	4.2	0.039
LHX3	0.57	1.8 (1-3)	4.2	0.039
MYF5	58	2e+25 (18-2.1e+49)	4.3	0.039
NAAA	-0.41	0.66 (0.45-0.98)	4.2	0.039
PIGF	-0.62	0.54 (0.3-0.97)	4.3	0.039
PKN1	0.43	1.5 (1-2.3)	4.3	0.039
PNMA2	0.15	1.2 (1-1.3)	4.3	0.039
PRICKLE3	0.43	1.5 (1-2.3)	4.3	0.039
RAB3A	0.25	1.3 (1-1.6)	4.2	0.039
SLC25A23	0.54	1.7 (1-2.8)	4.3	0.039
STAT2	0.4	1.5 (1-2.2)	4.3	0.039
WNT9A	0.23	1.3 (1-1.6)	4.3	0.039
YY1AP1	0.82	2.3 (1-4.9)	4.3	0.039
ZNF530	-0.17	0.84 (0.71-0.99)	4.2	0.039
APOC3	0.37	1.4 (1-2)	4.2	0.04
ARHGAP17	0.81	2.2 (1-4.9)	4.2	0.04
AVPR2	0.22	1.2 (1-1.5)	4.2	0.04
C1orf198	0.61	1.8 (1-3.3)	4.2	0.04
C6orf168	0.18	1.2 (1-1.4)	4.2	0.04
CASP5	-0.18	0.83 (0.7-0.99)	4.2	0.04
CCDC96	0.36	1.4 (1-2)	4.2	0.04
CLDND1	-0.51	0.6 (0.37-0.98)	4.2	0.04
DNMT3A	0.48	1.6 (1-2.6)	4.2	0.04
DTYMK	-0.48	0.62 (0.39-0.98)	4.2	0.04
GLDC	-0.16	0.86 (0.74-0.99)	4.2	0.04
ITGB6	-0.29	0.75 (0.56-0.99)	4.2	0.04
KDM4A	0.68	2 (1-3.8)	4.2	0.04
KIFC3	0.27	1.3 (1-1.7)	4.2	0.04
LOC388692	0.29	1.3 (1-1.8)	4.2	0.04
MAPK8IP3	0.3	1.3 (1-1.8)	4.2	0.04
MMS19	0.83	2.3 (1-5)	4.2	0.04
MOAP1	0.69	2 (1-3.8)	4.2	0.04
MYNN	-0.5	0.61 (0.38-0.98)	4.2	0.04
OLA1	-0.44	0.64 (0.42-0.98)	4.2	0.04
P2RX6	0.32	1.4 (1-1.9)	4.2	0.04
PLA2G4A	-0.14	0.87 (0.76-0.99)	4.2	0.04
PNN	0.53	1.7 (1-2.8)	4.2	0.04
PPP1R14D	-0.15	0.86 (0.75-0.99)	4.2	0.04
RPS6	-0.44	0.64 (0.42-0.98)	4.2	0.04
SLC10A3	0.39	1.5 (1-2.2)	4.2	0.04
SLC25A24	-0.42	0.66 (0.44-0.98)	4.2	0.04
SNORD76	8.5	5000 (1.5-1.7e+07)	4.2	0.04
SPRYD3	0.69	2 (1-3.8)	4.2	0.04
SSH1	0.55	1.7 (1-2.9)	4.2	0.04
TERF2IP	0.75	2.1 (1-4.3)	4.2	0.04
TMPPE	0.44	1.6 (1-2.4)	4.2	0.04
TPSG1	-0.11	0.89 (0.8-0.99)	4.2	0.04
XAGE2	0.29	1.3 (1-1.8)	4.2	0.04
ZNF252	-0.38	0.68 (0.48-0.98)	4.2	0.04
ATP5H	-0.48	0.62 (0.39-0.98)	4.2	0.041
C17orf47	0.43	1.5 (1-2.3)	4.2	0.041
C21orf29	0.15	1.2 (1-1.3)	4.2	0.041
C2orf48	0.2	1.2 (1-1.5)	4.2	0.041
CCDC13	0.32	1.4 (1-1.9)	4.2	0.041
CD48	-0.22	0.8 (0.65-0.99)	4.2	0.041
CDKN2AIP	-0.51	0.6 (0.37-0.98)	4.2	0.041
COLQ	0.28	1.3 (1-1.7)	4.2	0.041
DGAT2	-0.31	0.73 (0.54-0.99)	4.2	0.041
ECM1	0.25	1.3 (1-1.6)	4.2	0.041
FABP5L3	-1	0.35 (0.13-0.96)	4.2	0.041
FTSJD2	0.67	2 (1-3.7)	4.2	0.041
HEPHL1	-0.2	0.81 (0.67-0.99)	4.2	0.041
HMGN2	-0.43	0.65 (0.43-0.98)	4.2	0.041
ICOS	-0.2	0.82 (0.67-0.99)	4.2	0.041
KRT10	-0.37	0.69 (0.48-0.99)	4.2	0.041
KRT26	9500	Inf (6.4e+162-Inf)	4.2	0.041
KRTAP5_1	0.21	1.2 (1-1.5)	4.2	0.041
LAMB1	0.41	1.5 (1-2.2)	4.2	0.041
NAP1L5	0.37	1.5 (1-2.1)	4.2	0.041
NUDT9	-0.51	0.6 (0.37-0.98)	4.2	0.041
OTUD6B	-0.26	0.77 (0.6-0.99)	4.2	0.041
PCDHGC3	0.28	1.3 (1-1.7)	4.2	0.041
PTCH2	0.22	1.2 (1-1.5)	4.2	0.041
RTKN	0.72	2 (1-4.1)	4.2	0.041
SLC25A28	0.6	1.8 (1-3.3)	4.2	0.041
STAC	0.19	1.2 (1-1.4)	4.2	0.041
TBC1D17	0.61	1.8 (1-3.3)	4.2	0.041
TNRC6A	0.62	1.9 (1-3.4)	4.2	0.041
UBL7	0.76	2.1 (1-4.4)	4.2	0.041
VPS53	0.48	1.6 (1-2.5)	4.2	0.041
ZKSCAN2	0.48	1.6 (1-2.6)	4.2	0.041
ZNF75D	0.48	1.6 (1-2.5)	4.2	0.041
ARNT2	0.18	1.2 (1-1.4)	4.1	0.042
ASMT	0.51	1.7 (1-2.7)	4.1	0.042
C17orf100	0.38	1.5 (1-2.1)	4.2	0.042
CRHR1	0.31	1.4 (1-1.8)	4.1	0.042
DEFB108B	-10000	0 (0-1.3e-154)	4.1	0.042
DPEP1	-0.092	0.91 (0.83-1)	4.1	0.042
EFNB1	0.4	1.5 (1-2.2)	4.2	0.042
EML2	0.39	1.5 (1-2.2)	4.1	0.042
GPD1L	-0.5	0.61 (0.38-0.98)	4.1	0.042
HRNR	0.26	1.3 (1-1.7)	4.2	0.042
LOC148145	9700	Inf (2.6e+160-Inf)	4.2	0.042
LOC84740	0.08	1.1 (1-1.2)	4.1	0.042
LYRM4	-0.52	0.59 (0.36-0.98)	4.2	0.042
MYH15	-0.24	0.79 (0.62-0.99)	4.1	0.042
NCOR2	0.36	1.4 (1-2)	4.1	0.042
PAG1	-0.32	0.72 (0.53-0.99)	4.1	0.042
PTPLB	-0.41	0.67 (0.45-0.99)	4.1	0.042
SRMS	0.18	1.2 (1-1.4)	4.1	0.042
TMEM106B	-0.33	0.72 (0.53-0.99)	4.2	0.042
TPR	0.52	1.7 (1-2.8)	4.1	0.042
TTC16	0.22	1.3 (1-1.6)	4.1	0.042
WIT1	0.23	1.3 (1-1.6)	4.1	0.042
ACOXL	0.2	1.2 (1-1.5)	4.1	0.043
AGRN	0.32	1.4 (1-1.9)	4.1	0.043
AOC2	0.27	1.3 (1-1.7)	4.1	0.043
B3GAT2	0.33	1.4 (1-1.9)	4.1	0.043
BMP15	-9300	0 (0-3.2e-128)	4.1	0.043
BUD13	-0.52	0.59 (0.36-0.98)	4.1	0.043
C11orf49	0.53	1.7 (1-2.8)	4.1	0.043
CA5BP	0.46	1.6 (1-2.5)	4.1	0.043
DHX30	0.5	1.6 (1-2.7)	4.1	0.043
FAHD1	-0.57	0.57 (0.33-0.98)	4.1	0.043
GAS8	0.59	1.8 (1-3.2)	4.1	0.043
KHDRBS1	-0.7	0.5 (0.25-0.98)	4.1	0.043
LOC284440	0.35	1.4 (1-2)	4.1	0.043
LOC390858	0.93	2.5 (1-6.2)	4.1	0.043
LRCH4	0.53	1.7 (1-2.9)	4.1	0.043
MAFK	0.44	1.6 (1-2.4)	4.1	0.043
MAPK7	0.52	1.7 (1-2.8)	4.1	0.043
MIB2	0.32	1.4 (1-1.9)	4.1	0.043
MTMR1	0.58	1.8 (1-3.1)	4.1	0.043
NXF4	-9500	0 (0-5.7e-127)	4.1	0.043
PCDHB13	0.22	1.2 (1-1.5)	4.1	0.043
POLE3	-0.42	0.66 (0.44-0.99)	4.1	0.043
PPP1R2	-0.54	0.58 (0.35-0.98)	4.1	0.043
RNFT1	-0.34	0.71 (0.51-0.99)	4.1	0.043
SIAE	-0.37	0.69 (0.49-0.99)	4.1	0.043
SREBF1	0.34	1.4 (1-2)	4.1	0.043
SUGT1L1	0.29	1.3 (1-1.8)	4.1	0.043
TMEM100	-0.2	0.82 (0.68-0.99)	4.1	0.043
TMEM38A	-0.25	0.78 (0.61-0.99)	4.1	0.043
UBXN2B	-0.31	0.73 (0.54-0.99)	4.1	0.043
USP38	-0.39	0.68 (0.46-0.99)	4.1	0.043
AACSL	0.35	1.4 (1-2)	4.1	0.044
ANGPTL6	0.25	1.3 (1-1.6)	4.1	0.044
ASPG	-0.17	0.85 (0.72-1)	4.1	0.044
C2orf58	0.27	1.3 (1-1.7)	4	0.044
CCDC88B	0.19	1.2 (1-1.5)	4.1	0.044
DEPDC1B	-0.29	0.75 (0.57-0.99)	4	0.044
DMBT1	-0.084	0.92 (0.85-1)	4.1	0.044
ELMOD1	0.22	1.2 (1-1.5)	4	0.044
EZH2	-0.52	0.59 (0.36-0.99)	4.1	0.044
FBXO36	-0.29	0.75 (0.56-0.99)	4.1	0.044
FCER1A	-0.19	0.83 (0.69-0.99)	4.1	0.044
GABRG1	-9900	0 (0-3.8e-120)	4.1	0.044
GNGT2	-0.26	0.77 (0.6-0.99)	4.1	0.044
GOLGB1	0.49	1.6 (1-2.6)	4.1	0.044
GPR144	1.1	3 (1-8.7)	4.1	0.044
GPT	-0.15	0.86 (0.74-1)	4.1	0.044
IDH1	-0.53	0.59 (0.35-0.99)	4.1	0.044
LOC285548	0.27	1.3 (1-1.7)	4	0.044
LOC645323	0.48	1.6 (1-2.6)	4.1	0.044
LTBP4	0.26	1.3 (1-1.7)	4	0.044
NCKIPSD	0.46	1.6 (1-2.5)	4.1	0.044
PARK7	-0.59	0.55 (0.31-0.98)	4.1	0.044
PCGF2	0.33	1.4 (1-1.9)	4.1	0.044
PLEKHM1	0.56	1.8 (1-3)	4	0.044
POLR2B	-0.56	0.57 (0.33-0.99)	4	0.044
PRR11	-0.33	0.72 (0.52-0.99)	4.1	0.044
REXO2	-0.48	0.62 (0.39-0.99)	4.1	0.044
SLC18A2	-0.28	0.76 (0.58-0.99)	4	0.044
SLC23A2	0.43	1.5 (1-2.3)	4.1	0.044
SNCAIP	-0.15	0.86 (0.74-1)	4.1	0.044
TMEM97	-0.37	0.69 (0.48-0.99)	4	0.044
TRA2B	-0.76	0.47 (0.22-0.98)	4	0.044
TSPY3	-9500	0 (0-4.9e-118)	4.1	0.044
C15orf17	0.63	1.9 (1-3.5)	4	0.045
C1orf104	0.26	1.3 (1-1.7)	4	0.045
C8orf12	-9000	0 (0-3e-94)	4	0.045
DCTPP1	-0.47	0.62 (0.39-0.99)	4	0.045
DNAH17	0.3	1.4 (1-1.8)	4	0.045
DPP6	0.2	1.2 (1-1.5)	4	0.045
FER	0.28	1.3 (1-1.8)	4	0.045
KIAA2026	0.54	1.7 (1-2.9)	4	0.045
MCF2L	0.37	1.4 (1-2.1)	4	0.045
MDGA2	2.5	12 (1.1-140)	4	0.045
MLL4	0.48	1.6 (1-2.6)	4	0.045
NHLRC1	-0.14	0.87 (0.76-1)	4	0.045
NPRL3	0.48	1.6 (1-2.6)	4	0.045
PRSS27	0.18	1.2 (1-1.4)	4	0.045
RASA4	0.32	1.4 (1-1.9)	4	0.045
RPRD2	0.67	1.9 (1-3.7)	4	0.045
SEMA4F	0.41	1.5 (1-2.2)	4	0.045
SNX11	-0.63	0.53 (0.29-0.99)	4	0.045
TAS1R1	0.25	1.3 (1-1.7)	4	0.045
TSPYL1	0.74	2.1 (1-4.3)	4	0.045
TTC30A	-0.27	0.76 (0.59-0.99)	4	0.045
UPRT	0.48	1.6 (1-2.6)	4	0.045
YWHAZ	-0.4	0.67 (0.46-0.99)	4	0.045
AGAP8	0.29	1.3 (1-1.8)	4	0.046
ANKS3	0.46	1.6 (1-2.5)	4	0.046
ARTN	0.28	1.3 (1-1.8)	4	0.046
C12orf63	0.54	1.7 (1-2.9)	4	0.046
CNOT3	0.54	1.7 (1-2.9)	4	0.046
CPA4	0.19	1.2 (1-1.5)	4	0.046
DDX51	0.57	1.8 (1-3.1)	4	0.046
DFFB	-0.6	0.55 (0.31-0.99)	4	0.046
ERC2	0.22	1.2 (1-1.6)	4	0.046
FAM178B	0.16	1.2 (1-1.4)	4	0.046
GMCL1L	-0.32	0.73 (0.53-0.99)	4	0.046
HIPK4	0.43	1.5 (1-2.3)	4	0.046
HOXA5	0.21	1.2 (1-1.5)	4	0.046
HRNBP3	0.15	1.2 (1-1.4)	4	0.046
IL7R	-0.15	0.86 (0.75-1)	4	0.046
IRF5	0.32	1.4 (1-1.9)	4	0.046
KCNS3	-0.21	0.81 (0.66-1)	4	0.046
MED30	-0.44	0.65 (0.42-0.99)	4	0.046
MMP19	0.36	1.4 (1-2.1)	4	0.046
MYLK4	0.23	1.3 (1-1.6)	4	0.046
NR5A2	-0.21	0.81 (0.66-1)	4	0.046
PAK3	0.64	1.9 (1-3.6)	4	0.046
RBM5	0.63	1.9 (1-3.5)	4	0.046
RGS13	-0.2	0.82 (0.68-1)	4	0.046
SBK2	1.9	6.4 (1-40)	4	0.046
SIRPB1	-0.19	0.83 (0.69-1)	4	0.046
SLC12A6	0.49	1.6 (1-2.7)	4	0.046
SOX9	0.41	1.5 (1-2.3)	4	0.046
TGFB1I1	0.3	1.4 (1-1.8)	4	0.046
VEGFA	0.42	1.5 (1-2.3)	4	0.046
WDR45	0.47	1.6 (1-2.6)	4	0.046
YPEL4	0.25	1.3 (1-1.7)	4	0.046
ANKRD11	0.56	1.7 (1-3)	4	0.047
ARL6IP5	-0.58	0.56 (0.32-0.99)	4	0.047
C17orf39	0.57	1.8 (1-3.1)	3.9	0.047
C9orf82	-0.36	0.7 (0.49-0.99)	4	0.047
CENPT	0.49	1.6 (1-2.6)	4	0.047
CREB3L2	0.49	1.6 (1-2.6)	3.9	0.047
CSK	0.5	1.6 (1-2.7)	4	0.047
DBI	-0.49	0.61 (0.38-0.99)	4	0.047
DCLK2	0.23	1.3 (1-1.6)	4	0.047
DPEP3	0.39	1.5 (1-2.2)	3.9	0.047
DPYSL2	0.28	1.3 (1-1.7)	3.9	0.047
DRG1	-0.64	0.53 (0.28-0.99)	3.9	0.047
EGFL6	-0.19	0.82 (0.68-1)	3.9	0.047
EPDR1	-0.15	0.86 (0.74-1)	3.9	0.047
F13B	-9600	0 (0-2.1e-55)	3.9	0.047
FGFBP2	0.24	1.3 (1-1.6)	4	0.047
FLJ45340	0.29	1.3 (1-1.8)	3.9	0.047
FXYD7	0.63	1.9 (1-3.5)	4	0.047
GNAI2	0.4	1.5 (1-2.2)	3.9	0.047
GTPBP10	-0.36	0.7 (0.49-0.99)	4	0.047
GTPBP3	0.55	1.7 (1-3)	4	0.047
HPCA	0.24	1.3 (1-1.6)	4	0.047
LOC151162	0.36	1.4 (1-2)	4	0.047
MRE11A	-0.3	0.74 (0.55-1)	3.9	0.047
MS4A1	-0.13	0.88 (0.77-1)	3.9	0.047
NIT2	-0.4	0.67 (0.45-0.99)	4	0.047
NMNAT1	-0.48	0.62 (0.38-0.99)	4	0.047
NT5DC1	-0.45	0.64 (0.41-0.99)	4	0.047
PLAA	-0.61	0.54 (0.29-0.99)	3.9	0.047
RAD9B	0.43	1.5 (1-2.4)	4	0.047
RTN4	-0.61	0.54 (0.3-0.99)	3.9	0.047
SDR42E1	-0.11	0.9 (0.81-1)	4	0.047
SGSM2	0.36	1.4 (1-2)	3.9	0.047
SIN3B	0.59	1.8 (1-3.2)	3.9	0.047
TEAD3	0.57	1.8 (1-3.1)	3.9	0.047
TET1	0.25	1.3 (1-1.6)	3.9	0.047
UCHL1	0.15	1.2 (1-1.3)	3.9	0.047
VSIG10L	0.24	1.3 (1-1.6)	3.9	0.047
WFDC10A	0.47	1.6 (1-2.5)	3.9	0.047
ZNF341	0.51	1.7 (1-2.7)	3.9	0.047
C12orf74	0.25	1.3 (1-1.6)	3.9	0.048
CCDC42B	0.25	1.3 (1-1.6)	3.9	0.048
CNNM2	0.5	1.7 (1-2.7)	3.9	0.048
DDR1	0.52	1.7 (1-2.8)	3.9	0.048
DEFB4A	-0.7	0.49 (0.25-0.99)	3.9	0.048
DYRK1B	0.33	1.4 (1-1.9)	3.9	0.048
ERCC3	0.87	2.4 (1-5.6)	3.9	0.048
F2	0.19	1.2 (1-1.5)	3.9	0.048
FAM49B	-0.32	0.73 (0.53-1)	3.9	0.048
GDF2	9900	Inf (2.7e+28-Inf)	3.9	0.048
GPR115	-0.16	0.85 (0.72-1)	3.9	0.048
HPGD	-0.16	0.85 (0.73-1)	3.9	0.048
KDM1A	-0.6	0.55 (0.3-0.99)	3.9	0.048
KIF25	0.17	1.2 (1-1.4)	3.9	0.048
KRT1	-0.38	0.69 (0.47-1)	3.9	0.048
LRTOMT	-0.57	0.57 (0.32-0.99)	3.9	0.048
MAPK14	-0.6	0.55 (0.3-0.99)	3.9	0.048
MMP10	-0.13	0.88 (0.78-1)	3.9	0.048
MR1	0.32	1.4 (1-1.9)	3.9	0.048
NDP	-0.19	0.83 (0.69-1)	3.9	0.048
RYK	-0.55	0.58 (0.33-1)	3.9	0.048
SNORA71C	2.1	8.6 (1-71)	3.9	0.048
STMN1	-0.25	0.78 (0.61-1)	3.9	0.048
TCHP	0.69	2 (1-4)	3.9	0.048
TLN1	0.41	1.5 (1-2.3)	3.9	0.048
UBE2D3	-0.59	0.56 (0.31-0.99)	3.9	0.048
ZDHHC1	0.41	1.5 (1-2.3)	3.9	0.048
ZDHHC17	0.47	1.6 (1-2.5)	3.9	0.048
ALDH9A1	0.58	1.8 (1-3.2)	3.9	0.049
BAIAP2L1	0.51	1.7 (1-2.8)	3.9	0.049
C11orf31	-0.49	0.61 (0.37-1)	3.9	0.049
C12orf29	-0.36	0.7 (0.49-1)	3.9	0.049
C9orf122	0.25	1.3 (1-1.6)	3.9	0.049
DDX19B	0.79	2.2 (1-4.8)	3.9	0.049
EBAG9	-0.33	0.72 (0.52-1)	3.9	0.049
ELF3	0.49	1.6 (1-2.7)	3.9	0.049
HEXB	-0.66	0.52 (0.27-1)	3.9	0.049
LOC728606	0.27	1.3 (1-1.7)	3.9	0.049
LXN	-0.26	0.77 (0.6-1)	3.9	0.049
MLXIP	0.37	1.4 (1-2.1)	3.9	0.049
OAZ2	0.72	2 (1-4.2)	3.9	0.049
PCDHGA1	0.22	1.2 (1-1.5)	3.9	0.049
PCSK4	0.21	1.2 (1-1.5)	3.9	0.049
PIWIL1	0.092	1.1 (1-1.2)	3.9	0.049
PLA2R1	-0.2	0.82 (0.67-1)	3.9	0.049
PRR22	0.26	1.3 (1-1.7)	3.9	0.049
RBM3	-0.39	0.68 (0.46-1)	3.9	0.049
RSPH6A	0.87	2.4 (1-5.7)	3.9	0.049
SDCCAG8	0.62	1.9 (1-3.4)	3.9	0.049
SLC45A1	0.23	1.3 (1-1.6)	3.9	0.049
SPCS2	-0.36	0.7 (0.49-1)	3.9	0.049
TCF7L1	0.37	1.5 (1-2.1)	3.9	0.049
TIAF1	0.36	1.4 (1-2.1)	3.9	0.049
TRIM68	0.67	2 (1-3.8)	3.9	0.049
BAT1	0.79	2.2 (1-4.9)	3.8	0.05
BIRC5	-0.33	0.72 (0.51-1)	3.8	0.05
CDK18	0.37	1.4 (1-2.1)	3.9	0.05
CHMP2B	-0.36	0.7 (0.48-1)	3.8	0.05
CRIPAK	0.24	1.3 (1-1.6)	3.9	0.05
DCAF12L2	0.49	1.6 (1-2.7)	3.8	0.05
FLJ10357	0.35	1.4 (1-2)	3.8	0.05
FRMPD2	0.36	1.4 (1-2)	3.8	0.05
GNRHR2	0.44	1.6 (1-2.4)	3.8	0.05
ITPRIP	0.4	1.5 (1-2.2)	3.8	0.05
LAMB2	0.29	1.3 (1-1.8)	3.8	0.05
LAPTM4B	-0.18	0.83 (0.69-1)	3.8	0.05
LOC284023	0.45	1.6 (1-2.5)	3.9	0.05
MPRIP	0.46	1.6 (1-2.5)	3.8	0.05
OSR1	0.15	1.2 (1-1.3)	3.8	0.05
PTRH2	-0.53	0.59 (0.35-1)	3.8	0.05
RCN2	-0.34	0.71 (0.51-1)	3.8	0.05
RNF167	0.65	1.9 (1-3.7)	3.8	0.05
SLC5A5	0.31	1.4 (1-1.8)	3.8	0.05
TDRD7	-0.57	0.57 (0.32-1)	3.8	0.05
TINAG	-0.14	0.87 (0.76-1)	3.8	0.05
TMEM127	0.79	2.2 (1-4.8)	3.8	0.05
WDR4	-0.34	0.71 (0.51-1)	3.8	0.05
ZNF740	0.76	2.1 (1-4.6)	3.8	0.05

## Sheet: Early_consensus
x
CCDC114
IRF8
INSC
SOX13
ABCA7
GABBR1
HCN2
SALL1
COQ10A
IFNGR1
SERPINA5
TERT
ENO3
CXCL14
S100A1
PLXNB3
LACTB2
LZTS2
FAM120C
KCND1
RAP1GAP2
SLC24A1
MCM4
EFCAB4A
ADAMTSL4
GPR135
ARHGEF2
TLE6
C1RL
SERINC4
C6orf138
SLC27A1
PVRL3
LRRC16B
DCUN1D5
PRR4
IGFN1
PCDHB14
LOC92249
AMH
ARHGEF1
COL11A2
DUSP5P
SEMA4C
LOC402377
C12orf51
DMPK
TIMP1
MOBKL2B
C22orf23
FDXACB1
POLR2A
POP1
PTPRN
SGSM1
GRIPAP1
PPP1R3E
SLC4A3
MEMO1
PLEKHM1P
TNRC18
BZW2
NR1D1
PCDH9
SUPT5H
TXNRD2
PAQR6
PHF1
VAMP1
MPZL2
TCTN2
TMEM86B
TSPYL2
CCDC64
KIAA0913
DNASE1L3
MYH3
AGMAT
BAI2
ZNF821
NSMCE2
TACR2
DDB2
LIF
MECP2
RTN2
ZNF618
PEX2
BEAN
SLC30A2
ABCG2
MYADM
NDUFC2
PCDHB15
SI
TRDMT1
WASF1
CD99L2
ODF3L2
ANXA3
GPD1
PPFIA4
ABCD1
AVPI1
ZNF552
ANKRD34A
PCDH18
WNT5A
ARMC1
DOCK3
GUSBP3
MPP2
SLC25A33
TRAM1
MGC21881
SMTN
WDR6
CA11
DBF4
KIAA0649
SLC46A2
CHPF
LYPLA1
NFATC4
RG9MTD2
BHLHE40
PTMS
NUMBL
PCDHGA4
ULK1
AKR1B10
DCK
EPOR
PATL2
RYR2
BAG3
CAMTA2
FAM118B
GINS1
NEURL4
PLEKHF2
ARHGAP22
CPNE3
KIF7
FOXD4
SEZ6L2
CCL28
GDI1
NDUFB6
ZFAND1
CACNA1F
CDS1
TSSK4
BID
DLG3
KCNC3
NISCH
OIT3
PSD2
RNF139
SLC25A45
CWH43
ORAI3
RNF215
LOC283314
PCOLCE2
C9orf98
DDX54
EPR1
SPTBN4
TMEM151B
UNC45A
FLII
ITLN1
LOC100132288
APITD1
FOXD4L2
NOL3
ABR
PML
ACSBG1
HTATSF1
MAT1A
NLGN3
OSTCL
PAN2
CNTD2
CYP19A1
TMEM165
TP53BP1
ZNF362
MRPL15
TDO2
PRPF40B
CHAC2
PAQR5
SGK2
ARMC5
DHX58
GOLGA2B
GPR173
MPP3
TMED5
LOC220930
NDFIP2
RBM6
MAL2
SEMA4B
COX18
FABP5
FAM78B
FSCN2
FAM186B
SYBU
C17orf69
CLK2P
DEF6
PACS1
PRH2
OLFM4
ZNF204P
C9orf96
MPL
USP11
DLG4
LOC619207
WWC3
EID2B
TRPA1
UTP23
ABHD2
ANKRD24
TENC1
MPZL3
ARHGEF10
PARP3
SGK3
CAPRIN2
RRN3P2
HEATR4
FBXW4
TMEM70
CELF6
NR4A1
CUL7
RBM7
COQ2
EXOC3L
GUSBL1
KLHL25
SHANK1
TMEM99
DCST2
DOCK1
FAM116B
GAL
FHL3
MAP3K10
SIX5
FNDC5
ITGA8
CLSTN3
IER5
LOC100270710
C17orf68
CA4
TPTE2P1
ACCN3
TBC1D8
FZD2
LRP5L
CSMD2
HIP1R
KCNMB3
NLGN2
TMEM48
YTHDF3
PNO1
PPAT
PPIL1
UNC5A
AREG
E2F5
APBB3
C1orf59
LOC678655
APC2
C14orf142
C20orf3
CSGALNACT1
D4S234E
HDAC8
INHBB
ITGA7
NAV1
NOXO1
PDGFRA
PFN2
PLEKHG3
SLC25A32
SPTB
TAF1
AKAP6
C19orf76
CAPN3
CD47
ENKUR
GSTCD
KAZALD1
KIAA1841
KLC3
LOC100127888
NPAS3
PCDHGB4
RILPL2
SNAP25
TANC2
TMEM26
TRADD
ZG16
ZNF692
ADK
BTBD19
C17orf59
COPS5
CPNE9
DRP2
EDNRB
EFCAB5
EGFL8
EXTL3
GNG12
HAS1
HIGD1A
HOXD4
MAP3K14
MLL2
MTFR1
MYO1C
NARS2
NDUFB5
PCDHGA3
PCNXL2
PDE7A
SLC26A3
SRRM3
SYN1
TNIP3
TXNIP
UBA7
ADCY6
CCNE2
CLCA1
DNAH1
EGR4
ETV5
FAM160B2
FAM65C
LOC100126784
LOC286467
MEF2D
MMP7
MYBPC1
NLRP7
OTUD5
PELP1
PPARGC1A
SLC25A13
SNX5
SRRM5
TMEM14B
TPMT
ZBTB37
ZNF275
ZNF37B
CATSPER2
CBX6
CCDC149
CEACAM7
CELSR1
CORO6
DLAT
DSCC1
EFHC2
GLT25D2
KCNIP2
MORC4
MTERFD1
NUDCD1
OSTBETA
PHF17
RNF122
TATDN1
TMTC2
TNFRSF17
UGT2A3
UGT2B7
ABCB6
AK1
ALG8
C3orf26
C7orf28A
C8orf76
CDHR2
CHRAC1
CLCA4
CLCN3
DCAF13
DDAH2
EAF2
FGFR2
FIBCD1
FICD
IQSEC1
LOC283267
MRTO4
MSRA
NCRNA00107
OBSL1
PRX
PTPN14
RAPGEF3
SLC9A5
SMG6
TAF1C
TFAM
TMEM198
TNNT1
TRIM46
YWHAQ
BCAN
C1orf116
C1orf51
CDAN1
CLCF1
CPA3
CRAT
HSD17B11
HSFX2
HSPB1
IMPA1
LHX4
MACROD2
MELK
NANP
PHLDA3
SCG2
SLC6A17
SULT1B1
SYP
SYT17
THBS3
TMEM45B
UPK3BL
ZNF84
C6orf115
DHX38
DRD4
GLUL
GNB5
HOXB4
LOC644172
LYRM1
LZIC
PPIAL4C
RND2
SLC4A11
TLE3
TMEM200C
TMEM68
TMEM98
UBE2CBP
USP14
ARSG
BMP5
C11orf86
CENPP
CHD3
CNIH
DCDC2
FBXL8
GGT6
INE2
LCAT
LOC100170939
LOC642846
NLRP2
PCDHB12
STX1A
UTRN
ZNRF2
CASP1
CDC42
DDX12
GNB3
INSR
LRRC19
NBPF15
NEIL1
NFE2
PRKCD
PRMT3
RND1
SLC39A8
SMTNL2
TCEAL4
ZDHHC20
ZNF513
ATP6AP1
BCL6
CASP6
EREG
FAM189B
IGF1R
IGJ
KRT18
MTDH
PRKDC
PSAT1
PSORS1C1
SHC2
SPRY4
SPTBN5
TBX19
TNFRSF9
ZFYVE19
ZNF626
AMPD3
AP1G2
ASB16
CA1
CD1C
DNM1P35
ECHDC3
HIF3A
LDB1
LPCAT4
NPR2
NR4A2
NRG1
PHOSPHO1
PPA2
SLC35F5
ZNF589
ZNF767
APBB2
ARHGAP42
ATP2A1
C12orf53
CYB5RL
DDC
DUOXA2
EEF1B2
GGH
GPRASP1
HDC
HDHD1A
LRRC8A
MC1R
MXD4
NPNT
OTOF
PAQR8
PHLDB3
PLXNA3
PPM1N
PRRT1
RABEP2
REEP2
SRGAP1
STX3
SYNGR3
TFE3
TMEM195
TMEM206
ANKRD49
C17orf51
CCDC138
CD1D
CDRT4
CLIP2
CUEDC1
FAM92A1
FGFBP3
FLJ23867
HIVEP2
LOC284232
LOC554202
MARVELD1
NCRNA00115
OTUD7A
PDP1
SDHAP3
SHANK3
TMEM38B
ABCA3
BCL2L15
C6orf204
CAPN13
CCNA2
CTF1
DDX11
ERN2
FKBP10
FLJ10038
FOXD4L1
HMMR
LMNA
MYC
PBXIP1
QSOX1
RBM20
TRPV1
ZNF548
AKAP13
ALKBH5
APOBEC3F
CADPS
CHST14
CNTROB
EPHX4
FABP1
FAM174A
FAM65A
HOXA4
LGALS2
PCDHGA5
PTGR1
SLC25A40
TCEB1
TTYH2
UCA1
WDR81
ZFP36
ZNF826
ACAP3
ACTN1
C5orf20
EPB41L4B
FSD1
GABARAPL1
HIRIP3
HOXA7
KCNH2
KCNH6
MBD6
NPFF
PAF1
PHC1
PROCA1
S100A16
SKA3
SRGAP2
STAC3
ZNF646
BTG2
CTNNAL1
EMID1
FBXO27
HOXC6
IL22RA2
LOC143188
MED12
MYOM1
PORCN
RNF138
SDHD
STRADB
TMEM126B
TTPA
UBE2W
WASH2P
XDH
ZNF697
ZNF841
CUL5
EIF3CL
ENO2
FAM18A
HSDL2
ITGA10
KCNIP3
KDM5C
KLRB1
LPPR2
NDUFAF2
PAQR3
PPP1R3F
RUNDC3A
SIX4
SLC25A15
ZNF334
ARAP3
ARHGEF9
BAI1
DUSP6
FAM156A
FAM171A2
FAM176A
FYCO1
GMPR
HHAT
IER2
INPP5D
KDM6B
MS4A2
MYT1
NFKB2
PJA1
STK36
STX1B
TTC39B
UBA1
XRN2
ATAD2
C16orf48
C4orf36
C9orf41
CIT
DSTYK
FOXF2
HOXA6
HSF4
LGI2
LOC390595
LOC645332
NCKAP5L
NR2F2
NXT1
OGFR
PHKA1
RPA3
SERPINE1
SOD3
SP6
TIMM8B
ZBTB4
ZNF385A
ZNF597
ATP6V0D2
BDKRB2
C1orf204
C22orf46
C7orf51
CEBPA
COIL
FOXP4
HERC2P2
HOXC4
HSH2D
IL17RD
KLK4
KSR2
LOC653113
LYSMD4
MLH1
MRPL13
NPTXR
PKD1
RAI1
SPINT1
ACACB
APOBEC3C
BMP3
C3orf38
CD58
CXADR
FAM162A
IQCB1
PNPLA7
SLC22A20
TRAF5
TRIM62
WFS1
ADAMTS6
BCAS3
BRP44
GPR37
JPH4
KCNH1
KCNJ14
KIAA0467
LAMB3
LMTK3
MST1R
NGFRAP1
PFKFB4
PRPF8
RRM2
SFI1
SGMS1
SLC4A4
ACE
AK3
C8orf40
CAPN6
CDK5RAP3
DIAPH3
FABP2
FCHO1
FSCN1
GPR160
HUWE1
KCTD1
LOC92659
LYN
MID1IP1
MORN4
POLM
PRKRIR
SCOC
SMPDL3B
ACADVL
AMIGO3
ATF7IP
C17orf65
C2orf81
C5orf46
C8orf45
CUL9
DUOX2
HSPA4L
LOC200030
MRPL11
MTHFD2L
SH3BP4
TECTA
TMEM229B
TMEM50B
ARID5A
C20orf199
CDK16
DEFB1
DNAJC12
F8A1
GMNN
HSPA1A
KLC2
KLHL29
LOC100130015
LOC441454
PHKG1
POMT2
PRH1
RILPL1
ROBO3
SENP8
SGK494
SOX2
STXBP1
TNFSF11
TOX2
TREX1
WNK1
AGER
AHNAK2
AQP11
ARHGEF4
C13orf34
CCDC92
CCL22
DHRS1
DR1
EDIL3
GRIN2C
HNF4G
IFT140
ILDR2
LAMB2L
NR1I3
PRSS16
RNF207
TMEM205
ATP6V1G2
CKS2
CLCN4
CMC1
CREBBP
DIO2
DISP1
EBF4
IGSF21
MAGI2
MCHR1
PCDHB11
PNPLA2
S100A4
TJP1
TPD52
ZBTB20
ACOT1
ADCY4
BOLA3
DOK4
EML6
GPR133
HAAO
ISCA1
ISCA1P1
ITGA4
NAAA
PKN1
PNMA2
PRICKLE3
RAB3A
SLC25A23
STAT2
WNT9A
ZNF530
AVPR2
C6orf168
CASP5
CCDC96
DNMT3A
DTYMK
GLDC
ITGB6
KIFC3
LOC388692
MAPK8IP3
OLA1
PLA2G4A
PPP1R14D
RPS6
SLC10A3
SLC25A24
TMPPE
TPSG1
ZNF252
C21orf29
C2orf48
CCDC13
CD48
CDKN2AIP
COLQ
DGAT2
ECM1
HMGN2
ICOS
KRT10
KRTAP5_1
LAMB1
NAP1L5
OTUD6B
PCDHGC3
PTCH2
STAC
VPS53
ZKSCAN2
ZNF75D
ARNT2
C17orf100
DPEP1
EFNB1
EML2
LOC84740
LYRM4
MYH15
NCOR2
PAG1
PTPLB
SRMS
TMEM106B
TPR
TTC16
AGRN
AOC2
B3GAT2
C11orf49
CA5BP
FAHD1
LOC284440
MAFK
MAPK7
MIB2
PCDHB13
PPP1R2
RNFT1
SIAE
SREBF1
SUGT1L1
TMEM100
TMEM38A
UBXN2B
USP38
ANGPTL6
ASPG
CCDC88B
DEPDC1B
DMBT1
FBXO36
FCER1A
GNGT2
GOLGB1
GPT
LTBP4
PCGF2
PRR11
REXO2
SLC18A2
SLC23A2
SNCAIP
TMEM97
C1orf104
DCTPP1
DNAH17
FER
KIAA2026
MCF2L
MLL4
NHLRC1
PRSS27
RASA4
SEMA4F
TTC30A
UPRT
YWHAZ
AGAP8
ANKS3
ARTN
DDX51
ERC2
FAM178B
GMCL1L
HOXA5
HRNBP3
IL7R
IRF5
KCNS3
MED30
MMP19
MYLK4
NR5A2
RGS13
SIRPB1
SLC12A6
SOX9
TGFB1I1
VEGFA
WDR45
YPEL4
ARL6IP5
C9orf82
CENPT
CREB3L2
CSK
DBI
DCLK2
DPYSL2
EGFL6
EPDR1
FLJ45340
GNAI2
GTPBP10
HPCA
LOC151162
MRE11A
MS4A1
NIT2
NMNAT1
NT5DC1
RAD9B
SDR42E1
SGSM2
TET1
UCHL1
VSIG10L
C12orf74
CCDC42B
CNNM2
DYRK1B
FAM49B
GPR115
HPGD
MMP10
MR1
NDP
STMN1
TLN1
ZDHHC1
ZDHHC17
BAIAP2L1
C12orf29
C9orf122
EBAG9
LXN
MLXIP
PCDHGA1
PCSK4
PIWIL1
PLA2R1
PRR22
RBM3
SLC45A1
TCF7L1
TIAF1
BIRC5
CDK18
CHMP2B
CRIPAK
FLJ10357
GNRHR2
ITPRIP
LAMB2
LAPTM4B
LOC284023
MPRIP
OSR1
RCN2
TINAG
WDR4

## Sheet: Early_classifier
	importance
ABCA7	1.43794
ADK	0.641524
ARHGEF2	0.722655
C12orf29	0.657496
CAMTA2	0.756675
CASP6	1.92172
CHPF	1.48809
DCK	0.572054
DHX58	0.602956
FSCN1	0.556286
GGH	2.31266
GNAI2	1.46947
GPR160	1.31697
HSDL2	1.31843
IQCB1	1.09486
KDM6B	0.649025
KIFC3	1.09434
LAMB2	1.48676
LYPLA1	0.885533
MPRIP	0.907324
MRPL13	0.822227
NARS2	1.48708
NDFIP2	0.740126
NDUFB5	0.826371
NDUFC2	1.04544
NEURL4	1.12628
NFKB2	4.11571
NISCH	0.88719
NIT2	1.17558
NLGN2	1.90377
NUMBL	0.980452
OLA1	0.59331
OTUD6B	0.597373
PKD1	1.75381
PML	1.2766
PNO1	0.548861
PPP1R2	0.580091
PRMT3	2.11247
SDHD	0.571238
SGSM2	0.770529
SMG6	1.31782
SOX13	0.680066
TBC1D8	0.949798
TFAM	1.10612
TLN1	0.942139
TMEM68	0.622098
TTPA	0.970114
WDR81	0.753189
YWHAZ	0.671307
ZNRF2	0.629555

## Sheet: Advanced_pre
	beta	HR (95% CI for HR)	wald.test	p.value
LOC642826	0.68	2 (1.5-2.6)	24	8.3e-07
DMRT1	0.35	1.4 (1.2-1.6)	24	1.1e-06
CALB1	0.14	1.1 (1.1-1.2)	17	3.6e-05
ARG1	0.88	2.4 (1.6-3.8)	15	8.5e-05
SNORD12B	3.7	42 (6.4-280)	15	9.6e-05
GABRG2	0.4	1.5 (1.2-1.8)	15	0.0001
NKX2_5	0.37	1.4 (1.2-1.8)	14	0.00015
ID4	0.38	1.5 (1.2-1.8)	14	0.00017
KLHL29	-0.4	0.67 (0.54-0.83)	14	0.00017
C21orf128	1.8	5.9 (2.3-15)	14	0.00024
TBPL2	0.84	2.3 (1.5-3.7)	13	0.00028
PRSS54	1.7	5.3 (2.2-13)	13	0.0003
MAPKAPK3	-0.83	0.44 (0.28-0.69)	13	0.00034
CRYGN	0.64	1.9 (1.3-2.7)	13	0.00035
FEZF2	1.1	3.1 (1.7-5.8)	13	0.00036
PPP1R1C	0.28	1.3 (1.1-1.5)	13	0.00036
PDPK1	-0.82	0.44 (0.28-0.69)	13	0.00038
TFAMP1	1.9	6.9 (2.4-20)	12	0.00042
LOC652276	-0.62	0.54 (0.38-0.76)	12	0.00045
ZNF500	-0.89	0.41 (0.25-0.68)	12	0.00047
RGS21	0.64	1.9 (1.3-2.7)	12	0.00053
CEACAM5	-0.24	0.79 (0.69-0.9)	12	0.0006
FEV	0.27	1.3 (1.1-1.5)	12	0.00066
TRPC4AP	-0.81	0.45 (0.28-0.71)	11	0.0008
PRKAR2A	-0.48	0.62 (0.47-0.82)	11	0.00081
ALX4	0.82	2.3 (1.4-3.7)	11	0.00088
C12orf5	0.44	1.6 (1.2-2)	11	0.0011
PEX5L	0.5	1.6 (1.2-2.2)	11	0.0011
CSNK1A1P	0.8	2.2 (1.4-3.6)	11	0.0012
CALY	0.32	1.4 (1.1-1.7)	10	0.0013
CCL24	-0.21	0.81 (0.71-0.92)	10	0.0013
PRIC285	-0.4	0.67 (0.53-0.86)	10	0.0013
SPESP1	0.19	1.2 (1.1-1.3)	10	0.0013
WNT16	0.27	1.3 (1.1-1.6)	10	0.0013
CACNA1D	-0.25	0.78 (0.67-0.91)	10	0.0014
RASEF	-0.38	0.68 (0.54-0.86)	10	0.0014
NANOS1	0.6	1.8 (1.3-2.6)	10	0.0015
TIGD1	0.46	1.6 (1.2-2.1)	10	0.0015
C5orf34	0.5	1.6 (1.2-2.2)	10	0.0016
LOC55908	1.7	5.4 (1.9-16)	9.8	0.0017
SFRP5	0.21	1.2 (1.1-1.4)	9.8	0.0017
SLCO1B1	0.27	1.3 (1.1-1.6)	9.9	0.0017
IL20RB	0.23	1.3 (1.1-1.4)	9.8	0.0018
LOC100192379	5	140 (6.3-3200)	9.7	0.0019
MFHAS1	-0.4	0.67 (0.52-0.86)	9.7	0.0019
KCNH5	0.59	1.8 (1.2-2.6)	9.6	0.002
SERPINI2	1.9	6.8 (2-23)	9.5	0.002
TIRAP	-0.76	0.47 (0.29-0.76)	9.6	0.002
C10orf88	0.68	2 (1.3-3)	9.4	0.0021
HSP90AB4P	0.65	1.9 (1.3-2.9)	9.4	0.0021
CFHR5	5	150 (6.1-3500)	9.4	0.0022
TGFBRAP1	-0.56	0.57 (0.4-0.82)	9.4	0.0022
ARID5B	0.54	1.7 (1.2-2.4)	9.3	0.0023
C21orf129	0.34	1.4 (1.1-1.8)	9.3	0.0023
DMP1	0.58	1.8 (1.2-2.6)	9.3	0.0023
ACTRT1	-12000	0 (0-0)	9.1	0.0025
FAM72B	0.41	1.5 (1.2-2)	9.2	0.0025
RAB11FIP3	-0.51	0.6 (0.43-0.84)	9.2	0.0025
FAM9C	0.37	1.5 (1.1-1.8)	9	0.0026
ATP13A2	-0.52	0.59 (0.42-0.83)	9	0.0027
LHFPL1	0.8	2.2 (1.3-3.7)	9	0.0027
WIBG	0.8	2.2 (1.3-3.8)	9	0.0027
SAA1	0.13	1.1 (1-1.2)	8.9	0.0028
ARMC3	0.73	2.1 (1.3-3.4)	8.9	0.0029
ATP2C2	-0.32	0.72 (0.59-0.9)	8.9	0.0029
C12orf77	4.1	59 (4-870)	8.8	0.0029
DMRT3	0.22	1.2 (1.1-1.4)	8.8	0.0029
RPN2	-0.71	0.49 (0.31-0.78)	8.9	0.0029
RSPRY1	-0.69	0.5 (0.32-0.79)	8.9	0.0029
VWDE	0.18	1.2 (1.1-1.3)	8.9	0.0029
ABRA	0.74	2.1 (1.3-3.4)	8.8	0.003
MAGEA1	0.24	1.3 (1.1-1.5)	8.8	0.003
BRIX1	0.52	1.7 (1.2-2.4)	8.7	0.0032
CCDC127	0.81	2.2 (1.3-3.8)	8.7	0.0032
MYO1D	-0.49	0.61 (0.44-0.85)	8.7	0.0032
RNF167	0.87	2.4 (1.3-4.3)	8.7	0.0032
HSPA8	-0.58	0.56 (0.38-0.82)	8.6	0.0033
C7orf72	3.7	40 (3.4-480)	8.6	0.0034
KIAA0319L	-0.79	0.45 (0.27-0.77)	8.6	0.0034
ZNF248	0.59	1.8 (1.2-2.7)	8.6	0.0034
HDAC3	-0.93	0.4 (0.21-0.74)	8.5	0.0035
OSBPL3	0.52	1.7 (1.2-2.4)	8.5	0.0036
WDR49	0.87	2.4 (1.3-4.3)	8.5	0.0036
JRKL	0.49	1.6 (1.2-2.3)	8.4	0.0037
SIRT2	-0.71	0.49 (0.3-0.79)	8.4	0.0037
FAM18B2	0.49	1.6 (1.2-2.3)	8.4	0.0038
FHL2	-0.49	0.61 (0.44-0.85)	8.4	0.0038
CTNNA1	-0.78	0.46 (0.27-0.78)	8.4	0.0039
GUSBP1	0.7	2 (1.2-3.2)	8.3	0.0041
CELA1	12	130000 (42-4.3e+08)	8.2	0.0042
PABPN1	0.75	2.1 (1.3-3.5)	8.2	0.0042
AMFR	-0.84	0.43 (0.24-0.77)	8.1	0.0043
FAM167A	-0.24	0.79 (0.67-0.93)	8.2	0.0043
UCA1	0.14	1.2 (1-1.3)	8.2	0.0043
TAF5	0.74	2.1 (1.3-3.5)	8	0.0046
ZNF157	0.78	2.2 (1.3-3.8)	8	0.0046
CABLES2	-0.42	0.66 (0.49-0.88)	8	0.0047
CUEDC1	-0.48	0.62 (0.44-0.86)	8	0.0047
HS6ST3	0.26	1.3 (1.1-1.6)	8	0.0047
NSUN2	0.86	2.4 (1.3-4.3)	8	0.0047
AKAP1	-0.51	0.6 (0.42-0.86)	7.9	0.0048
MGC2752	-1	0.37 (0.18-0.74)	8	0.0048
SAA2	0.13	1.1 (1-1.2)	8	0.0048
SNORA56	2.1	8.5 (1.9-37)	7.9	0.0049
C1orf105	0.2	1.2 (1.1-1.4)	7.9	0.005
LOC100131726	0.5	1.6 (1.2-2.3)	7.9	0.005
SULF2	-0.35	0.7 (0.55-0.9)	7.9	0.005
VEZF1	-0.79	0.45 (0.26-0.79)	7.9	0.005
KIAA0141	-0.66	0.52 (0.33-0.82)	7.8	0.0051
WIPI1	-0.43	0.65 (0.48-0.88)	7.8	0.0051
DCLRE1C	0.54	1.7 (1.2-2.5)	7.8	0.0052
PCOLCE2	0.15	1.2 (1-1.3)	7.8	0.0052
COX17	0.61	1.8 (1.2-2.8)	7.8	0.0053
PTCHD1	0.19	1.2 (1.1-1.4)	7.8	0.0053
C12orf32	0.53	1.7 (1.2-2.5)	7.7	0.0054
HCG4P6	0.28	1.3 (1.1-1.6)	7.7	0.0055
C11orf48	0.61	1.8 (1.2-2.8)	7.7	0.0056
FANCL	0.62	1.9 (1.2-2.9)	7.7	0.0056
LOC144742	-12000	0 (0-0)	7.7	0.0056
LRFN3	-0.41	0.67 (0.5-0.89)	7.7	0.0056
XCL1	0.2	1.2 (1.1-1.4)	7.7	0.0056
CYP7A1	0.38	1.5 (1.1-1.9)	7.6	0.0058
DCTN5	-0.81	0.44 (0.25-0.79)	7.6	0.0058
GTF2IP1	0.59	1.8 (1.2-2.7)	7.6	0.0059
TSC2	-0.54	0.58 (0.4-0.86)	7.6	0.0059
DNAJC22	-0.34	0.71 (0.56-0.91)	7.5	0.006
TGFBI	-0.24	0.79 (0.66-0.93)	7.5	0.0062
TPTE2P3	0.5	1.6 (1.2-2.3)	7.5	0.0062
ASPHD2	-0.32	0.73 (0.58-0.91)	7.4	0.0064
UBE2G2	0.75	2.1 (1.2-3.6)	7.4	0.0064
WDR31	-0.32	0.72 (0.57-0.91)	7.4	0.0065
ALPP	0.12	1.1 (1-1.2)	7.4	0.0066
FAM72A	0.4	1.5 (1.1-2)	7.4	0.0066
GALNT10	-0.47	0.63 (0.45-0.88)	7.4	0.0066
EFCAB10	0.29	1.3 (1.1-1.7)	7.4	0.0067
NDC80	0.38	1.5 (1.1-1.9)	7.3	0.0068
TRAPPC6B	0.55	1.7 (1.2-2.6)	7.3	0.0068
PARP2	0.58	1.8 (1.2-2.7)	7.2	0.0071
PLAUR	-0.37	0.69 (0.53-0.9)	7.2	0.0071
C15orf23	0.5	1.7 (1.1-2.4)	7.2	0.0072
VN1R2	4.8	130 (3.7-4400)	7.2	0.0072
GPR87	0.25	1.3 (1.1-1.5)	7.2	0.0073
SNRNP35	0.71	2 (1.2-3.4)	7.2	0.0073
CHGB	0.13	1.1 (1-1.3)	7.1	0.0075
ENSA	0.78	2.2 (1.2-3.8)	7.1	0.0075
GRB14	0.15	1.2 (1-1.3)	7.1	0.0075
C17orf67	-0.38	0.68 (0.52-0.9)	7.1	0.0076
PROCA1	0.29	1.3 (1.1-1.6)	7.1	0.0077
CYFIP2	-0.31	0.73 (0.58-0.92)	7	0.0079
LOC100130522	0.23	1.3 (1.1-1.5)	7.1	0.0079
NLN	-0.48	0.62 (0.43-0.88)	7	0.0079
C22orf27	0.47	1.6 (1.1-2.3)	7	0.0081
NOG	0.26	1.3 (1.1-1.6)	7	0.0081
ZNF26	0.52	1.7 (1.1-2.5)	7	0.0081
KIAA1244	-0.31	0.74 (0.59-0.92)	7	0.0082
VGLL1	0.16	1.2 (1-1.3)	7	0.0082
KCNB2	0.26	1.3 (1.1-1.6)	7	0.0083
BCCIP	0.62	1.9 (1.2-3)	6.9	0.0084
C10orf62	1.1	2.9 (1.3-6.5)	7	0.0084
INHA	0.17	1.2 (1-1.4)	7	0.0084
PHACTR4	-0.76	0.47 (0.27-0.82)	7	0.0084
FAM72D	0.4	1.5 (1.1-2)	6.9	0.0085
LENEP	3.1	22 (2.2-230)	6.9	0.0085
MTERF	0.3	1.4 (1.1-1.7)	6.9	0.0085
DAPL1	0.16	1.2 (1-1.3)	6.9	0.0086
CLEC16A	-0.6	0.55 (0.35-0.86)	6.9	0.0087
PROM2	0.16	1.2 (1-1.3)	6.9	0.0087
HESRG	0.33	1.4 (1.1-1.8)	6.9	0.0088
NTNG1	0.2	1.2 (1.1-1.4)	6.9	0.0088
C20orf134	-0.3	0.74 (0.6-0.93)	6.8	0.0089
CCDC97	-0.77	0.46 (0.26-0.82)	6.8	0.0089
LPA	0.42	1.5 (1.1-2.1)	6.8	0.0089
NCRNA00183	0.52	1.7 (1.1-2.5)	6.8	0.0089
C1orf61	0.29	1.3 (1.1-1.6)	6.8	0.009
PLS3	0.47	1.6 (1.1-2.3)	6.8	0.009
C3orf30	6.3	550 (4.8-63000)	6.8	0.0091
PARL	0.7	2 (1.2-3.4)	6.8	0.0091
CYBA	0.35	1.4 (1.1-1.9)	6.8	0.0092
RAB23	0.35	1.4 (1.1-1.8)	6.8	0.0092
MGAT4B	-0.51	0.6 (0.41-0.88)	6.8	0.0093
SYT4	0.18	1.2 (1-1.4)	6.8	0.0093
HTR3C	0.25	1.3 (1.1-1.6)	6.7	0.0094
ODAM	0.13	1.1 (1-1.3)	6.8	0.0094
HJURP	0.55	1.7 (1.1-2.6)	6.7	0.0095
PRG4	0.14	1.2 (1-1.3)	6.7	0.0095
SLCO4A1	-0.31	0.73 (0.58-0.93)	6.7	0.0096
WASF2	-0.61	0.54 (0.34-0.86)	6.7	0.0096
AVL9	-0.57	0.56 (0.37-0.87)	6.7	0.0097
BMS1P5	0.43	1.5 (1.1-2.1)	6.7	0.0097
C10orf58	0.42	1.5 (1.1-2.1)	6.7	0.0097
FAM178A	0.66	1.9 (1.2-3.2)	6.7	0.0097
FKBP4	0.44	1.5 (1.1-2.2)	6.7	0.0097
RFFL	-0.61	0.54 (0.34-0.86)	6.7	0.0097
GPHA2	0.45	1.6 (1.1-2.2)	6.7	0.0098
LDOC1L	-0.51	0.6 (0.41-0.88)	6.7	0.0098
ABCA12	0.12	1.1 (1-1.2)	6.6	0.01
ADCY9	-0.4	0.67 (0.49-0.91)	6.6	0.01
ATP6V1B1	0.17	1.2 (1-1.3)	6.6	0.01
C19orf30	0.36	1.4 (1.1-1.9)	6.6	0.01
CCDC58	0.44	1.6 (1.1-2.2)	6.6	0.01
CCDC90A	0.57	1.8 (1.1-2.7)	6.6	0.01
CHMP4A	0.48	1.6 (1.1-2.3)	6.6	0.01
CSAG2	0.14	1.1 (1-1.3)	6.6	0.01
DAG1	-0.62	0.54 (0.34-0.86)	6.6	0.01
KRTAP4_12	-9600	0 (0-0)	6.6	0.01
MATN2	-0.2	0.82 (0.71-0.95)	6.6	0.01
PIN4	0.44	1.6 (1.1-2.2)	6.6	0.01
RBP7	0.2	1.2 (1-1.4)	6.6	0.01
RPS6KA1	-0.48	0.62 (0.43-0.89)	6.6	0.01
SCARNA21	-11000	0 (0-0)	6.6	0.01
ST18	0.18	1.2 (1-1.4)	6.6	0.01
WNT5A	-0.29	0.75 (0.6-0.93)	6.6	0.01
AKR1C1	0.21	1.2 (1-1.5)	6.4	0.011
ART5	0.17	1.2 (1-1.3)	6.4	0.011
C14orf23	0.55	1.7 (1.1-2.6)	6.6	0.011
C6orf52	0.27	1.3 (1.1-1.6)	6.4	0.011
CACNG5	0.98	2.7 (1.2-5.7)	6.4	0.011
CC2D2A	0.26	1.3 (1.1-1.6)	6.4	0.011
COG7	-0.75	0.47 (0.27-0.84)	6.4	0.011
COX16	0.46	1.6 (1.1-2.2)	6.5	0.011
CSDA	0.66	1.9 (1.2-3.2)	6.5	0.011
DDR1	-0.5	0.61 (0.41-0.89)	6.4	0.011
ERGIC1	-0.64	0.53 (0.32-0.86)	6.5	0.011
FLJ37201	0.29	1.3 (1.1-1.7)	6.4	0.011
HES5	0.23	1.3 (1.1-1.5)	6.4	0.011
HSPBAP1	0.52	1.7 (1.1-2.5)	6.5	0.011
LOC100302401	0.36	1.4 (1.1-1.9)	6.5	0.011
LPPR3	0.33	1.4 (1.1-1.8)	6.4	0.011
NFKB1	-0.66	0.51 (0.31-0.86)	6.5	0.011
PPP2R2D	0.88	2.4 (1.2-4.7)	6.5	0.011
SPDYE1	0.37	1.4 (1.1-1.9)	6.4	0.011
C16orf68	-0.57	0.56 (0.36-0.88)	6.4	0.012
CCDC151	0.37	1.4 (1.1-1.9)	6.3	0.012
DDOST	-0.78	0.46 (0.25-0.84)	6.3	0.012
FAM89A	0.41	1.5 (1.1-2.1)	6.3	0.012
FLJ35776	0.4	1.5 (1.1-2)	6.3	0.012
GLT25D2	0.12	1.1 (1-1.2)	6.4	0.012
GLYATL3	0.42	1.5 (1.1-2.1)	6.2	0.012
GOLT1A	0.32	1.4 (1.1-1.8)	6.3	0.012
GSTA2	0.23	1.3 (1.1-1.5)	6.3	0.012
GSTM3	0.19	1.2 (1-1.4)	6.3	0.012
KCNMB3	0.35	1.4 (1.1-1.9)	6.2	0.012
MCCD1	9900	Inf (Inf-Inf)	6.3	0.012
MGRN1	-0.48	0.62 (0.43-0.9)	6.3	0.012
PRR3	0.58	1.8 (1.1-2.8)	6.3	0.012
RPH3A	0.32	1.4 (1.1-1.8)	6.3	0.012
SLFN13	0.16	1.2 (1-1.3)	6.4	0.012
SUPV3L1	0.62	1.9 (1.1-3)	6.3	0.012
TAS2R20	0.29	1.3 (1.1-1.7)	6.2	0.012
UCHL5	0.5	1.6 (1.1-2.4)	6.3	0.012
ALDH1A1	0.16	1.2 (1-1.3)	6.2	0.013
ATP5SL	-0.66	0.51 (0.31-0.87)	6.2	0.013
C9orf37	0.46	1.6 (1.1-2.3)	6.2	0.013
DERL2	0.46	1.6 (1.1-2.3)	6.2	0.013
DOK1	-0.57	0.57 (0.36-0.89)	6.2	0.013
GLYR1	-0.66	0.51 (0.3-0.87)	6.1	0.013
MAGOHB	0.41	1.5 (1.1-2.1)	6.2	0.013
METTL10	0.53	1.7 (1.1-2.6)	6.2	0.013
PELP1	0.46	1.6 (1.1-2.3)	6.2	0.013
SNCB	0.37	1.5 (1.1-2)	6.1	0.013
SNRPD1	0.45	1.6 (1.1-2.2)	6.2	0.013
TMEM81	0.36	1.4 (1.1-1.9)	6.2	0.013
TUG1	0.55	1.7 (1.1-2.7)	6.1	0.013
VSTM1	-0.48	0.62 (0.42-0.9)	6.2	0.013
AP2A2	-0.48	0.62 (0.43-0.91)	6.1	0.014
ATF2	-0.53	0.59 (0.39-0.9)	6	0.014
BRD7P3	1.7	5.6 (1.4-22)	6	0.014
C7orf16	0.3	1.3 (1.1-1.7)	6	0.014
CSAG1	0.12	1.1 (1-1.2)	6	0.014
DNAH12	0.23	1.3 (1-1.5)	6	0.014
HRASLS5	0.14	1.1 (1-1.3)	6	0.014
NPSR1	0.094	1.1 (1-1.2)	6	0.014
PNN	0.52	1.7 (1.1-2.5)	6.1	0.014
PRDM5	-0.21	0.81 (0.69-0.96)	6	0.014
SCG3	0.15	1.2 (1-1.3)	6	0.014
SEZ6	0.21	1.2 (1-1.5)	6	0.014
SOHLH2	0.27	1.3 (1.1-1.6)	6	0.014
TNFAIP1	-0.65	0.52 (0.31-0.88)	6	0.014
VPS26B	-0.77	0.46 (0.25-0.86)	6	0.014
ZNF716	0.34	1.4 (1.1-1.8)	6.1	0.014
ABHD12B	0.096	1.1 (1-1.2)	5.9	0.015
ANXA8L1	0.91	2.5 (1.2-5.2)	6	0.015
AWAT2	-9600	0 (0-0)	5.9	0.015
C10orf82	0.13	1.1 (1-1.3)	5.9	0.015
C3orf39	-0.33	0.72 (0.55-0.94)	5.9	0.015
C5orf51	0.44	1.6 (1.1-2.2)	5.9	0.015
C9orf119	0.55	1.7 (1.1-2.7)	5.9	0.015
CHKA	0.4	1.5 (1.1-2.1)	5.9	0.015
FANCM	0.38	1.5 (1.1-2)	5.9	0.015
GPR157	-0.28	0.76 (0.6-0.95)	5.9	0.015
IGF2BP1	0.086	1.1 (1-1.2)	5.9	0.015
PRPF39	0.49	1.6 (1.1-2.4)	5.9	0.015
RTN4RL2	-0.23	0.79 (0.66-0.96)	5.9	0.015
STL	0.35	1.4 (1.1-1.9)	5.9	0.015
TBRG1	0.66	1.9 (1.1-3.3)	5.9	0.015
TFPI	0.23	1.3 (1-1.5)	6	0.015
TMEM196	0.62	1.9 (1.1-3.1)	5.9	0.015
TMEM31	0.44	1.6 (1.1-2.2)	5.9	0.015
TROVE2	0.41	1.5 (1.1-2.1)	6	0.015
UBN1	-0.65	0.52 (0.31-0.88)	6	0.015
WDR70	0.64	1.9 (1.1-3.2)	5.9	0.015
ANP32E	0.34	1.4 (1.1-1.8)	5.8	0.016
BGLAP	0.31	1.4 (1.1-1.8)	5.8	0.016
C15orf17	0.58	1.8 (1.1-2.9)	5.8	0.016
C1QL3	-0.19	0.82 (0.7-0.96)	5.8	0.016
C21orf29	0.13	1.1 (1-1.3)	5.8	0.016
KLC4	-0.38	0.68 (0.5-0.93)	5.8	0.016
KLHL32	-0.19	0.83 (0.71-0.97)	5.8	0.016
LOC344595	0.23	1.3 (1-1.5)	5.8	0.016
LOC84740	0.08	1.1 (1-1.2)	5.8	0.016
MAGEA12	0.099	1.1 (1-1.2)	5.8	0.016
MAOB	0.13	1.1 (1-1.3)	5.8	0.016
MAS1	9400	Inf (Inf-Inf)	5.8	0.016
NDST4	0.45	1.6 (1.1-2.2)	5.8	0.016
PMS2L2	0.46	1.6 (1.1-2.3)	5.8	0.016
SCNM1	0.55	1.7 (1.1-2.7)	5.8	0.016
SLC22A5	-0.49	0.61 (0.41-0.91)	5.8	0.016
SLC35E1	-0.76	0.47 (0.25-0.87)	5.8	0.016
SPDYE8P	0.4	1.5 (1.1-2.1)	5.8	0.016
STC2	0.17	1.2 (1-1.4)	5.8	0.016
TMED4	-0.63	0.53 (0.32-0.89)	5.8	0.016
TMED8	0.45	1.6 (1.1-2.3)	5.8	0.016
ATP6V1D	0.46	1.6 (1.1-2.3)	5.7	0.017
C12orf49	-0.58	0.56 (0.35-0.9)	5.7	0.017
C3orf55	0.13	1.1 (1-1.3)	5.7	0.017
CNPY1	0.45	1.6 (1.1-2.3)	5.6	0.017
DNPEP	-0.69	0.5 (0.28-0.88)	5.7	0.017
HNRNPC	0.63	1.9 (1.1-3.1)	5.8	0.017
MTRR	0.46	1.6 (1.1-2.3)	5.7	0.017
WDR53	0.55	1.7 (1.1-2.7)	5.7	0.017
ZNF324	-0.49	0.61 (0.41-0.92)	5.7	0.017
ACADVL	0.52	1.7 (1.1-2.6)	5.6	0.018
ACTL6B	0.36	1.4 (1.1-1.9)	5.6	0.018
ANKS1A	-0.63	0.53 (0.32-0.9)	5.6	0.018
C6orf27	-0.27	0.76 (0.61-0.95)	5.6	0.018
CCDC50	0.54	1.7 (1.1-2.7)	5.6	0.018
CCT5	0.64	1.9 (1.1-3.2)	5.6	0.018
DNAJB11	0.61	1.8 (1.1-3)	5.6	0.018
ENTPD6	-0.35	0.7 (0.53-0.94)	5.6	0.018
FAM175B	0.65	1.9 (1.1-3.3)	5.6	0.018
GLRX2	0.36	1.4 (1.1-1.9)	5.6	0.018
GPR111	0.24	1.3 (1-1.5)	5.6	0.018
IGSF11	0.23	1.3 (1-1.5)	5.6	0.018
KLF15	0.15	1.2 (1-1.3)	5.6	0.018
NCRNA00201	0.27	1.3 (1-1.6)	5.6	0.018
NUDT13	0.36	1.4 (1.1-1.9)	5.6	0.018
NXPH4	0.098	1.1 (1-1.2)	5.6	0.018
OTUB2	-0.29	0.75 (0.59-0.95)	5.6	0.018
PAX6	0.28	1.3 (1-1.7)	5.6	0.018
PID1	-0.18	0.83 (0.72-0.97)	5.6	0.018
RICTOR	0.38	1.5 (1.1-2)	5.6	0.018
RPAIN	0.57	1.8 (1.1-2.8)	5.6	0.018
SAMD10	-0.33	0.72 (0.55-0.95)	5.6	0.018
SETD3	0.66	1.9 (1.1-3.4)	5.6	0.018
SHH	-0.2	0.82 (0.7-0.97)	5.6	0.018
TBC1D9B	-0.53	0.59 (0.38-0.91)	5.6	0.018
ZNF598	-0.4	0.67 (0.49-0.93)	5.6	0.018
ZNF808	0.41	1.5 (1.1-2.1)	5.6	0.018
ZSWIM5	-0.24	0.78 (0.64-0.96)	5.6	0.018
BLOC1S2	0.41	1.5 (1.1-2.1)	5.5	0.019
C16orf91	-0.46	0.63 (0.43-0.93)	5.6	0.019
CCDC6	0.67	2 (1.1-3.4)	5.5	0.019
CLPS	0.55	1.7 (1.1-2.7)	5.5	0.019
DDX6	0.6	1.8 (1.1-3)	5.5	0.019
FKBP3	0.38	1.5 (1.1-2)	5.5	0.019
GLB1	-0.63	0.53 (0.31-0.9)	5.5	0.019
GRINL1A	0.48	1.6 (1.1-2.4)	5.5	0.019
NRCAM	0.16	1.2 (1-1.3)	5.5	0.019
TCF23	0.54	1.7 (1.1-2.7)	5.5	0.019
TKT	-0.48	0.62 (0.41-0.92)	5.5	0.019
TTTY10	1.3	3.8 (1.2-12)	5.5	0.019
ZNF141	0.24	1.3 (1-1.6)	5.5	0.019
ANP32D	1.8	5.9 (1.3-26)	5.4	0.02
BTBD12	-0.44	0.65 (0.45-0.93)	5.4	0.02
CABLES1	0.29	1.3 (1-1.7)	5.4	0.02
CASP9	-0.54	0.59 (0.37-0.92)	5.4	0.02
CCDC77	0.43	1.5 (1.1-2.2)	5.4	0.02
KLHL23	-0.35	0.7 (0.52-0.95)	5.4	0.02
KRT28	0.94	2.6 (1.2-5.6)	5.4	0.02
MARCKS	0.4	1.5 (1.1-2.1)	5.4	0.02
MSI2	-0.48	0.62 (0.41-0.93)	5.4	0.02
NOMO1	-0.66	0.52 (0.3-0.9)	5.4	0.02
NPPB	0.71	2 (1.1-3.7)	5.4	0.02
PELI1	0.48	1.6 (1.1-2.4)	5.4	0.02
PLA2G10	-0.19	0.82 (0.7-0.97)	5.4	0.02
PSCA	0.094	1.1 (1-1.2)	5.4	0.02
RABEP1	0.52	1.7 (1.1-2.6)	5.4	0.02
RAD21L1	2.7	14 (1.5-140)	5.4	0.02
RFX4	0.35	1.4 (1.1-1.9)	5.4	0.02
RIMKLA	-0.24	0.79 (0.64-0.96)	5.4	0.02
RPL23AP32	1.5	4.5 (1.3-16)	5.4	0.02
SLC44A4	-0.2	0.82 (0.7-0.97)	5.4	0.02
THOC1	0.42	1.5 (1.1-2.2)	5.4	0.02
TRMT6	0.37	1.4 (1.1-2)	5.4	0.02
TSEN34	-0.56	0.57 (0.35-0.92)	5.4	0.02
TTN	0.22	1.2 (1-1.5)	5.4	0.02
UBQLNL	0.3	1.4 (1-1.7)	5.4	0.02
USMG5	0.41	1.5 (1.1-2.1)	5.4	0.02
VTI1B	0.55	1.7 (1.1-2.8)	5.4	0.02
ZNF37B	0.33	1.4 (1.1-1.8)	5.4	0.02
ZNF385B	0.18	1.2 (1-1.4)	5.4	0.02
ACTG1	-0.46	0.63 (0.43-0.93)	5.4	0.021
ARHGEF10L	-0.4	0.67 (0.47-0.94)	5.3	0.021
ARPC5L	0.71	2 (1.1-3.7)	5.4	0.021
BANF2	0.64	1.9 (1.1-3.3)	5.4	0.021
BNIP3	0.15	1.2 (1-1.3)	5.3	0.021
C20orf173	-9700	0 (0-0)	5.4	0.021
C5orf22	0.43	1.5 (1.1-2.2)	5.3	0.021
CHST9	0.27	1.3 (1-1.7)	5.4	0.021
CISH	-0.33	0.72 (0.54-0.95)	5.3	0.021
CTDSP2	-0.55	0.58 (0.36-0.92)	5.3	0.021
DAB1	-0.28	0.76 (0.6-0.96)	5.3	0.021
ERGIC3	-0.4	0.67 (0.48-0.94)	5.3	0.021
GBX2	0.16	1.2 (1-1.4)	5.3	0.021
GNG13	0.18	1.2 (1-1.4)	5.3	0.021
LOC100128554	0.35	1.4 (1.1-1.9)	5.3	0.021
MCM8	0.34	1.4 (1.1-1.9)	5.3	0.021
MICAL2	-0.49	0.61 (0.4-0.93)	5.3	0.021
MUM1L1	0.15	1.2 (1-1.3)	5.4	0.021
PKD1L1	-0.19	0.83 (0.7-0.97)	5.3	0.021
PKHD1	0.14	1.2 (1-1.3)	5.3	0.021
PLAC8L1	0.49	1.6 (1.1-2.5)	5.4	0.021
RAD51AP1	0.3	1.3 (1-1.7)	5.3	0.021
RNF19B	-0.42	0.66 (0.46-0.94)	5.3	0.021
RUNDC2A	-0.29	0.75 (0.58-0.96)	5.4	0.021
SAR1A	0.58	1.8 (1.1-2.9)	5.4	0.021
STX8	0.45	1.6 (1.1-2.3)	5.3	0.021
TBC1D16	-0.38	0.68 (0.49-0.94)	5.3	0.021
TMEM194A	0.44	1.6 (1.1-2.3)	5.3	0.021
TMEM84	-0.42	0.66 (0.46-0.94)	5.3	0.021
ZBTB34	0.53	1.7 (1.1-2.7)	5.4	0.021
ZFP36L2	-0.42	0.65 (0.46-0.94)	5.3	0.021
ACSS2	-0.36	0.7 (0.52-0.95)	5.2	0.022
ANKRD27	-0.51	0.6 (0.39-0.93)	5.3	0.022
BAP1	-0.69	0.5 (0.28-0.91)	5.2	0.022
BET1L	-0.59	0.55 (0.33-0.92)	5.2	0.022
BFAR	-0.67	0.51 (0.29-0.91)	5.3	0.022
BNIP2	0.41	1.5 (1.1-2.1)	5.3	0.022
CA3	0.18	1.2 (1-1.4)	5.2	0.022
CDADC1	0.43	1.5 (1.1-2.2)	5.2	0.022
CDKN3	0.33	1.4 (1-1.8)	5.2	0.022
COX6C	0.39	1.5 (1.1-2.1)	5.3	0.022
DNAH11	0.31	1.4 (1-1.8)	5.3	0.022
EIF5B	0.4	1.5 (1.1-2.1)	5.2	0.022
HCG2P7	0.25	1.3 (1-1.6)	5.2	0.022
IL7	-0.2	0.81 (0.68-0.97)	5.2	0.022
NECAP2	-0.64	0.53 (0.31-0.91)	5.3	0.022
OCLN	-0.38	0.68 (0.49-0.95)	5.3	0.022
OTUD7A	-0.24	0.79 (0.64-0.97)	5.2	0.022
PAFAH1B3	-0.4	0.67 (0.48-0.94)	5.2	0.022
RAD1	0.5	1.7 (1.1-2.5)	5.2	0.022
RXRB	-0.69	0.5 (0.28-0.9)	5.3	0.022
SURF2	0.42	1.5 (1.1-2.2)	5.2	0.022
tAKR	-9500	0 (0-0)	5.2	0.022
TEX2	-0.58	0.56 (0.34-0.92)	5.3	0.022
TRIM67	0.19	1.2 (1-1.4)	5.3	0.022
CBFA2T2	-0.4	0.67 (0.47-0.95)	5.2	0.023
CHDH	-0.27	0.76 (0.61-0.96)	5.2	0.023
DBX2	0.88	2.4 (1.1-5.1)	5.2	0.023
DNAJA3	-0.48	0.62 (0.41-0.94)	5.1	0.023
DULLARD	0.63	1.9 (1.1-3.3)	5.2	0.023
EED	0.61	1.8 (1.1-3.1)	5.2	0.023
FAM166A	1.2	3.3 (1.2-9.5)	5.1	0.023
HM13	-0.51	0.6 (0.39-0.93)	5.2	0.023
MRPL51	0.54	1.7 (1.1-2.7)	5.2	0.023
NDUFS6	0.48	1.6 (1.1-2.5)	5.1	0.023
NMU	0.12	1.1 (1-1.3)	5.1	0.023
POU5F2	2.1	8.2 (1.3-50)	5.2	0.023
PRB4	-8500	0 (0-0)	5.2	0.023
PRPSAP2	0.53	1.7 (1.1-2.7)	5.2	0.023
RALGAPA2	-0.22	0.8 (0.66-0.97)	5.2	0.023
SAA4	0.16	1.2 (1-1.3)	5.2	0.023
SNORD88C	8500	Inf (Inf-Inf)	5.1	0.023
TMEM139	0.32	1.4 (1-1.8)	5.1	0.023
ZFP64	-0.55	0.58 (0.36-0.93)	5.2	0.023
AGAP7	0.25	1.3 (1-1.6)	5.1	0.024
ANKRD34C	0.38	1.5 (1.1-2)	5.1	0.024
ASPM	0.32	1.4 (1-1.8)	5.1	0.024
AVP	0.71	2 (1.1-3.8)	5.1	0.024
CBX5	0.43	1.5 (1.1-2.2)	5.1	0.024
CPT2	-0.5	0.61 (0.4-0.94)	5.1	0.024
CYB561	-0.62	0.54 (0.31-0.92)	5.1	0.024
EDEM2	-0.51	0.6 (0.39-0.94)	5.1	0.024
ELP2P	0.29	1.3 (1-1.7)	5.1	0.024
FKBP9L	-0.42	0.66 (0.46-0.95)	5.1	0.024
HOXC8	0.14	1.1 (1-1.3)	5.1	0.024
IFNA10	8400	Inf (Inf-Inf)	5.1	0.024
IL28B	1	2.8 (1.1-6.6)	5.1	0.024
KBTBD7	-0.35	0.7 (0.52-0.95)	5.1	0.024
KIAA0090	-0.56	0.57 (0.35-0.93)	5.1	0.024
LARS2	-0.46	0.63 (0.43-0.94)	5.1	0.024
LITAF	-0.44	0.64 (0.44-0.94)	5.1	0.024
MOSC1	0.33	1.4 (1-1.9)	5.1	0.024
MRPL47	0.44	1.5 (1.1-2.3)	5.1	0.024
PARK2	-0.21	0.81 (0.67-0.97)	5.1	0.024
PFDN6	0.41	1.5 (1.1-2.2)	5.1	0.024
PMS2L5	0.44	1.6 (1.1-2.3)	5.1	0.024
PRSS48	1.1	3.1 (1.2-8.5)	5.1	0.024
RAB15	-0.32	0.72 (0.55-0.96)	5.1	0.024
RWDD2B	0.42	1.5 (1.1-2.2)	5.1	0.024
SEC61G	0.44	1.5 (1.1-2.3)	5.1	0.024
SPDYC	0.17	1.2 (1-1.4)	5.1	0.024
TBX20	-0.2	0.82 (0.68-0.97)	5.1	0.024
TNNT3	0.29	1.3 (1-1.7)	5.1	0.024
TTC22	-0.24	0.79 (0.64-0.97)	5.1	0.024
UBTFL1	-8700	0 (0-0)	5.1	0.024
WDR72	0.1	1.1 (1-1.2)	5.1	0.024
ZNF676	0.5	1.7 (1.1-2.6)	5.1	0.024
ATP6V0A4	0.16	1.2 (1-1.4)	5	0.025
C14orf177	-9100	0 (0-0)	5	0.025
C15orf63	0.39	1.5 (1-2.1)	5	0.025
DSC1	1	2.8 (1.1-6.7)	5	0.025
GABRB2	0.11	1.1 (1-1.2)	5	0.025
GPR20	-0.21	0.81 (0.67-0.97)	5	0.025
LDHAL6B	-0.54	0.58 (0.36-0.93)	5	0.025
NDNL2	0.5	1.6 (1.1-2.5)	5	0.025
NOMO2	-0.47	0.62 (0.41-0.94)	5	0.025
NRBF2	0.54	1.7 (1.1-2.7)	5	0.025
NT5C1A	1.3	3.5 (1.2-10)	5	0.025
S100A7	0.14	1.2 (1-1.3)	5	0.025
SERPINI1	0.18	1.2 (1-1.4)	5	0.025
SLC16A10	0.18	1.2 (1-1.4)	5	0.025
SLC5A1	-0.15	0.86 (0.75-0.98)	5	0.025
TBX22	440	2.5e+189 (1.5e+24-Inf)	5	0.025
ZNF451	0.53	1.7 (1.1-2.7)	5	0.025
AMELY	2.6	14 (1.4-140)	4.9	0.026
ANKRD30A	0.64	1.9 (1.1-3.3)	4.9	0.026
AOX2P	0.95	2.6 (1.1-6)	4.9	0.026
ARL5C	8	2900 (2.6-3200000)	4.9	0.026
ATXN8OS	1.5	4.6 (1.2-17)	4.9	0.026
BSX	6.9	1000 (2.2-450000)	4.9	0.026
C4orf35	3.8	46 (1.6-1400)	4.9	0.026
CAPZA3	17	2.4e+07 (7.4-8.1e+13)	4.9	0.026
CELA2A	0.43	1.5 (1.1-2.3)	5	0.026
CETN3	0.32	1.4 (1-1.8)	5	0.026
CIB3	5.7	290 (2-44000)	4.9	0.026
CXorf64	6.7	780 (2.2-280000)	4.9	0.026
CXorf66	4.6	100 (1.7-5900)	4.9	0.026
DUPD1	1.5	4.6 (1.2-17)	4.9	0.026
FAM27L	6.9	1000 (2.2-440000)	4.9	0.026
GABRA1	0.97	2.6 (1.1-6.2)	4.9	0.026
GJD2	430	5.3e+188 (3.9e+22-Inf)	5	0.026
GNA11	-0.34	0.71 (0.53-0.96)	4.9	0.026
GTF2F2	0.36	1.4 (1-2)	4.9	0.026
H2BFM	1.7	5.3 (1.2-23)	4.9	0.026
KBTBD4	-0.5	0.6 (0.39-0.94)	5	0.026
KRTAP11_1	2	7.2 (1.3-41)	4.9	0.026
KRTAP21_2	34	5.2e+14 (62-4.5e+27)	5	0.026
KTI12	-0.63	0.53 (0.31-0.93)	5	0.026
LOC145845	1.8	5.9 (1.2-29)	4.9	0.026
LOC200726	1	2.7 (1.1-6.6)	4.9	0.026
LOC284379	5.9	360 (2-66000)	4.9	0.026
LOC285740	25	8.7e+10 (21-3.7e+20)	5	0.026
LOC340357	3	20 (1.4-290)	4.9	0.026
LOC347376	-9100	0 (0-0)	4.9	0.026
LOC407835	-0.44	0.64 (0.44-0.95)	5	0.026
LRRC52	13	420000 (4.7-3.9e+10)	5	0.026
LUZP4	0.53	1.7 (1.1-2.7)	4.9	0.026
LYZL4	0.96	2.6 (1.1-6.1)	5	0.026
MAP2K4	0.58	1.8 (1.1-3)	4.9	0.026
MNAT1	0.36	1.4 (1-2)	4.9	0.026
MSGN1	7.3	1500 (2.4-930000)	4.9	0.026
NCOA6	-0.4	0.67 (0.47-0.95)	5	0.026
NCRNA00028	1.5	4.6 (1.2-18)	4.9	0.026
NCRNA00099	2.9	19 (1.4-240)	4.9	0.026
OR12D2	0.84	2.3 (1.1-4.8)	4.9	0.026
OR2A2	2.5	12 (1.3-100)	4.9	0.026
OR4D5	4.4	85 (1.7-4300)	4.9	0.026
OR51A7	1	2.8 (1.1-6.9)	4.9	0.026
OR51B2	22	3.2e+09 (14-7.2e+17)	5	0.026
OR52W1	3.7	40 (1.5-1000)	4.9	0.026
OR6Y1	2.9	19 (1.4-240)	4.9	0.026
OR7A5	0.71	2 (1.1-3.8)	4.9	0.026
PNLIP	1.2	3.2 (1.1-8.8)	4.9	0.026
PNPLA6	-0.38	0.68 (0.49-0.95)	5	0.026
RBMY1A3P	1.7	5.5 (1.2-25)	4.9	0.026
RLN3	0.39	1.5 (1-2.1)	4.9	0.026
RPL3L	1.2	3.3 (1.1-9.3)	4.9	0.026
RPS24	0.38	1.5 (1-2)	4.9	0.026
SNAPC1	0.35	1.4 (1-1.9)	5	0.026
SNORA66	3	19 (1.4-260)	4.9	0.026
SNORA79	3.4	30 (1.5-600)	4.9	0.026
SNORD104	5	150 (1.8-13000)	4.9	0.026
SNORD111B	8.3	3800 (2.6-5600000)	4.9	0.026
SNORD116_2	17	2.5e+07 (7.4-8.1e+13)	4.9	0.026
SNORD121B	5.1	160 (1.8-15000)	4.9	0.026
SNORD58C	13	380000 (4.5-3.1e+10)	4.9	0.026
SNORD79	5.3	200 (1.9-22000)	4.9	0.026
SNORD88B	8.8	6500 (2.8-1.5e+07)	4.9	0.026
SNORD91A	19	1.9e+08 (9.4-3.7e+15)	4.9	0.026
SPANXN2	0.6	1.8 (1.1-3.1)	4.9	0.026
SPINK14	8	2900 (2.5-3400000)	4.9	0.026
SPO11	0.81	2.2 (1.1-4.6)	4.9	0.026
SPRR2C	1	2.9 (1.1-7.2)	4.9	0.026
SYCP1	0.58	1.8 (1.1-3)	4.9	0.026
SYP	0.2	1.2 (1-1.4)	5	0.026
TFAP2D	0.39	1.5 (1-2.1)	4.9	0.026
TSPAN16	3.4	30 (1.5-600)	4.9	0.026
UCP1	1.4	4.1 (1.2-15)	4.9	0.026
UNCX	0.3	1.4 (1-1.8)	5	0.026
VENTXP1	1.5	4.7 (1.2-18)	4.9	0.026
XAGE5	1.2	3.5 (1.2-10)	4.9	0.026
ZIM2	1.8	6.2 (1.2-31)	4.9	0.026
ZNF679	430	5.2e+188 (6.4e+22-Inf)	5	0.026
ZSWIM2	6.9	1000 (2.3-450000)	4.9	0.026
ANKRD26	0.32	1.4 (1-1.8)	4.9	0.027
C10orf4	0.43	1.5 (1-2.2)	4.9	0.027
C17orf101	-0.38	0.68 (0.49-0.96)	4.9	0.027
C21orf71	1.3	3.5 (1.2-11)	4.9	0.027
CORO7	-0.37	0.69 (0.5-0.96)	4.9	0.027
EFHC2	0.16	1.2 (1-1.4)	4.9	0.027
FABP4	0.095	1.1 (1-1.2)	4.9	0.027
H2AFY2	0.21	1.2 (1-1.5)	4.9	0.027
HS6ST1	-0.4	0.67 (0.47-0.96)	4.9	0.027
KRTAP4_5	-9000	0 (0-0)	4.9	0.027
LOC100286844	0.27	1.3 (1-1.7)	4.9	0.027
MTHFS	0.43	1.5 (1.1-2.3)	4.9	0.027
MYL12B	0.45	1.6 (1.1-2.3)	4.9	0.027
NICN1	-0.42	0.65 (0.45-0.95)	4.9	0.027
NKX2_4	50	3.8e+21 (300-5e+40)	4.9	0.027
NPAS4	0.3	1.4 (1-1.8)	4.9	0.027
PHYHIPL	0.091	1.1 (1-1.2)	4.9	0.027
PORCN	-0.35	0.71 (0.52-0.96)	4.9	0.027
SAMD5	0.14	1.1 (1-1.3)	4.9	0.027
SLC22A16	0.28	1.3 (1-1.7)	4.9	0.027
SLC6A12	0.17	1.2 (1-1.4)	4.9	0.027
SRI	-0.38	0.68 (0.49-0.96)	4.9	0.027
SSBP1	0.46	1.6 (1.1-2.4)	4.9	0.027
BRS3	0.66	1.9 (1.1-3.5)	4.9	0.028
C14orf105	0.14	1.2 (1-1.3)	4.8	0.028
C20orf11	-0.52	0.59 (0.37-0.94)	4.8	0.028
CHRNB1	0.24	1.3 (1-1.6)	4.8	0.028
CX3CL1	0.2	1.2 (1-1.5)	4.8	0.028
CYFIP1	-0.59	0.56 (0.33-0.94)	4.8	0.028
FAM20B	0.58	1.8 (1.1-3)	4.8	0.028
FUT6	-0.16	0.85 (0.73-0.98)	4.8	0.028
KIAA0195	-0.41	0.67 (0.46-0.96)	4.8	0.028
KIAA1279	0.6	1.8 (1.1-3.1)	4.8	0.028
LCE3E	430	1.6e+187 (9.2e+19-Inf)	4.8	0.028
LIPJ	29	4.4e+12 (25-7.7e+23)	4.9	0.028
NDUFAF1	0.55	1.7 (1.1-2.8)	4.8	0.028
NUP155	0.5	1.7 (1.1-2.6)	4.9	0.028
OR1L8	0.82	2.3 (1.1-4.7)	4.8	0.028
PIK3C2G	0.3	1.4 (1-1.8)	4.8	0.028
PRPF18	0.53	1.7 (1.1-2.7)	4.8	0.028
SERPINB13	0.79	2.2 (1.1-4.5)	4.8	0.028
SPRR2B	0.45	1.6 (1-2.3)	4.8	0.028
TMEM60	0.43	1.5 (1-2.3)	4.8	0.028
ZNF286B	0.32	1.4 (1-1.8)	4.8	0.028
ZNF83	0.28	1.3 (1-1.7)	4.8	0.028
CALCB	0.16	1.2 (1-1.4)	4.8	0.029
CLEC18C	0.69	2 (1.1-3.7)	4.8	0.029
DKFZP686I15217	0.37	1.4 (1-2)	4.8	0.029
DLEU2	0.24	1.3 (1-1.6)	4.8	0.029
FXYD3	-0.2	0.82 (0.68-0.98)	4.8	0.029
GLIPR1L1	3.1	23 (1.4-390)	4.7	0.029
HTR7P1	0.27	1.3 (1-1.7)	4.8	0.029
MDM2	0.33	1.4 (1-1.9)	4.8	0.029
MTMR2	0.48	1.6 (1.1-2.5)	4.8	0.029
OGDHL	0.11	1.1 (1-1.2)	4.8	0.029
OR10G7	4.5	91 (1.6-5200)	4.8	0.029
OSGEP	0.46	1.6 (1-2.4)	4.8	0.029
PHGDH	0.17	1.2 (1-1.4)	4.7	0.029
POU4F2	0.46	1.6 (1-2.4)	4.8	0.029
RAB5C	-0.51	0.6 (0.38-0.95)	4.8	0.029
TMEM8B	-0.34	0.71 (0.53-0.97)	4.8	0.029
TXNDC5	-0.5	0.61 (0.39-0.95)	4.7	0.029
XRCC2	0.36	1.4 (1-2)	4.8	0.029
AMTN	1.2	3.4 (1.1-10)	4.7	0.03
ANXA8L2	0.14	1.2 (1-1.3)	4.7	0.03
AQP7P3	0.4	1.5 (1-2.1)	4.7	0.03
CSPG5	-0.19	0.83 (0.7-0.98)	4.7	0.03
FAM120B	-0.62	0.54 (0.31-0.94)	4.7	0.03
FAM84A	-0.19	0.82 (0.69-0.98)	4.7	0.03
LOC100134713	0.38	1.5 (1-2.1)	4.7	0.03
MAGEA3	0.082	1.1 (1-1.2)	4.7	0.03
MGLL	-0.35	0.7 (0.51-0.97)	4.7	0.03
NFAT5	0.32	1.4 (1-1.9)	4.7	0.03
POMZP3	0.28	1.3 (1-1.7)	4.7	0.03
RNASEK	0.43	1.5 (1-2.3)	4.7	0.03
RRP15	0.42	1.5 (1-2.2)	4.7	0.03
STAG3L4	0.39	1.5 (1-2.1)	4.7	0.03
TGIF2LX	0.82	2.3 (1.1-4.8)	4.7	0.03
TTTY16	-8500	0 (0-0)	4.7	0.03
ZBBX	2.7	16 (1.3-190)	4.7	0.03
ZDHHC8	-0.29	0.75 (0.58-0.97)	4.7	0.03
BACE2	-0.32	0.73 (0.54-0.97)	4.6	0.031
C1orf31	0.4	1.5 (1-2.1)	4.7	0.031
C2orf67	0.39	1.5 (1-2.1)	4.7	0.031
CHORDC1	0.34	1.4 (1-1.9)	4.7	0.031
CUTC	0.44	1.5 (1-2.3)	4.7	0.031
DIAPH1	-0.55	0.57 (0.35-0.95)	4.6	0.031
FAM3C	0.35	1.4 (1-2)	4.6	0.031
GFER	-0.47	0.62 (0.41-0.96)	4.7	0.031
GLUD2	-0.44	0.64 (0.43-0.96)	4.7	0.031
ITGB1BP2	0.2	1.2 (1-1.5)	4.6	0.031
LECT2	0.78	2.2 (1.1-4.4)	4.6	0.031
LOC283392	0.3	1.3 (1-1.8)	4.7	0.031
MAGEF1	0.46	1.6 (1-2.4)	4.6	0.031
MUL1	-0.66	0.51 (0.28-0.94)	4.7	0.031
PCDH1	-0.33	0.72 (0.53-0.97)	4.7	0.031
PIGO	-0.55	0.57 (0.35-0.95)	4.6	0.031
PSMD8	-0.64	0.53 (0.29-0.94)	4.7	0.031
RAD52	0.48	1.6 (1-2.5)	4.6	0.031
RPRML	0.2	1.2 (1-1.5)	4.6	0.031
UCKL1	-0.34	0.71 (0.52-0.97)	4.6	0.031
VHL	-0.53	0.59 (0.36-0.95)	4.7	0.031
ABCA2	-0.26	0.77 (0.61-0.98)	4.6	0.032
ACTL9	-8200	0 (0-3.9e-301)	4.6	0.032
CD99	0.3	1.4 (1-1.8)	4.6	0.032
CDC73	0.47	1.6 (1-2.5)	4.6	0.032
CPNE4	0.22	1.2 (1-1.5)	4.6	0.032
DRAP1	0.49	1.6 (1-2.5)	4.6	0.032
IL21	1.2	3.2 (1.1-9.5)	4.6	0.032
KRTAP24_1	-8700	0 (0-0)	4.6	0.032
MGC21881	0.32	1.4 (1-1.8)	4.6	0.032
NEB	0.13	1.1 (1-1.3)	4.6	0.032
PMEPA1	-0.2	0.82 (0.68-0.98)	4.6	0.032
POTEA	-8200	0 (0-5.0999999999986e-312)	4.6	0.032
SCGN	0.14	1.1 (1-1.3)	4.6	0.032
UNC5B	-0.26	0.77 (0.61-0.98)	4.6	0.032
WDR65	0.43	1.5 (1-2.3)	4.6	0.032
ZNF789	0.36	1.4 (1-2)	4.6	0.032
ANXA8	0.15	1.2 (1-1.3)	4.6	0.033
C16orf90	0.4	1.5 (1-2.1)	4.5	0.033
CCRN4L	-0.35	0.7 (0.51-0.97)	4.5	0.033
CDK1	0.27	1.3 (1-1.7)	4.5	0.033
COQ10A	0.43	1.5 (1-2.3)	4.6	0.033
CXorf1	430	4.2e+184 (8.4e+14-Inf)	4.6	0.033
DKFZP586I1420	0.38	1.5 (1-2.1)	4.6	0.033
HSF2	0.49	1.6 (1-2.6)	4.6	0.033
JPH3	0.16	1.2 (1-1.4)	4.5	0.033
L3MBTL3	0.3	1.4 (1-1.8)	4.5	0.033
LOC728758	0.36	1.4 (1-2)	4.6	0.033
PIH1D2	0.23	1.3 (1-1.6)	4.5	0.033
RAB40C	-0.41	0.66 (0.46-0.97)	4.6	0.033
RPP30	0.39	1.5 (1-2.1)	4.6	0.033
RYR3	0.2	1.2 (1-1.5)	4.6	0.033
SCUBE1	-0.16	0.85 (0.74-0.99)	4.6	0.033
SNTG1	0.8	2.2 (1.1-4.7)	4.6	0.033
TRAF7	-0.47	0.62 (0.4-0.96)	4.6	0.033
ZNF530	0.2	1.2 (1-1.5)	4.6	0.033
ZNF680	0.3	1.4 (1-1.8)	4.6	0.033
ARVCF	-0.28	0.75 (0.58-0.98)	4.5	0.034
AURKC	0.26	1.3 (1-1.6)	4.5	0.034
C7orf53	0.22	1.2 (1-1.5)	4.5	0.034
CLC	-0.12	0.89 (0.79-0.99)	4.5	0.034
DTX3	0.22	1.2 (1-1.5)	4.5	0.034
FAM119B	-0.4	0.67 (0.46-0.97)	4.5	0.034
GNA12	-0.63	0.53 (0.3-0.95)	4.5	0.034
LUC7L3	0.43	1.5 (1-2.3)	4.5	0.034
NAT15	-0.45	0.64 (0.42-0.97)	4.5	0.034
SMTNL2	0.12	1.1 (1-1.3)	4.5	0.034
TARS	0.5	1.7 (1-2.6)	4.5	0.034
TCP10L	0.19	1.2 (1-1.5)	4.5	0.034
TNFAIP8L3	0.19	1.2 (1-1.4)	4.5	0.034
WDR89	0.47	1.6 (1-2.5)	4.5	0.034
ZNF213	-0.34	0.71 (0.52-0.97)	4.5	0.034
ZNF519	0.29	1.3 (1-1.7)	4.5	0.034
ABCC4	-0.22	0.8 (0.66-0.98)	4.5	0.035
CCNI	-0.53	0.59 (0.36-0.96)	4.4	0.035
CSAG3	0.11	1.1 (1-1.2)	4.4	0.035
CSNK1G2	-0.42	0.66 (0.45-0.97)	4.4	0.035
DTL	0.33	1.4 (1-1.9)	4.4	0.035
FAM76B	0.37	1.4 (1-2)	4.5	0.035
KIAA0101	0.28	1.3 (1-1.7)	4.4	0.035
KIAA1467	0.2	1.2 (1-1.5)	4.4	0.035
LDLR	-0.33	0.72 (0.53-0.98)	4.4	0.035
MED6	0.43	1.5 (1-2.3)	4.5	0.035
NSUN6	0.49	1.6 (1-2.6)	4.4	0.035
PAIP1	0.4	1.5 (1-2.2)	4.4	0.035
PDGFA	-0.28	0.76 (0.58-0.98)	4.4	0.035
PLD4	-0.15	0.86 (0.75-0.99)	4.4	0.035
PMM2	-0.49	0.61 (0.39-0.97)	4.4	0.035
POU4F1	0.12	1.1 (1-1.3)	4.5	0.035
PPP6C	0.55	1.7 (1-2.9)	4.4	0.035
PSMC3IP	0.3	1.4 (1-1.8)	4.4	0.035
PSMC6	0.39	1.5 (1-2.1)	4.5	0.035
SGMS1	0.34	1.4 (1-1.9)	4.4	0.035
TTC13	0.4	1.5 (1-2.2)	4.4	0.035
ZNF576	-0.61	0.54 (0.31-0.96)	4.4	0.035
ZNF738	0.27	1.3 (1-1.7)	4.5	0.035
ABCG2	0.14	1.2 (1-1.3)	4.4	0.036
ADCY3	-0.33	0.72 (0.53-0.98)	4.4	0.036
AEBP2	0.44	1.6 (1-2.4)	4.4	0.036
C12orf56	0.12	1.1 (1-1.3)	4.4	0.036
C14orf156	0.36	1.4 (1-2)	4.4	0.036
C1orf56	0.37	1.5 (1-2.1)	4.4	0.036
CCDC48	-0.24	0.79 (0.63-0.98)	4.4	0.036
CCDC84	0.39	1.5 (1-2.1)	4.4	0.036
CEACAM6	-0.14	0.87 (0.76-0.99)	4.4	0.036
CECR5	-0.41	0.67 (0.45-0.97)	4.4	0.036
DGKB	0.1	1.1 (1-1.2)	4.4	0.036
DNAJC5	-0.37	0.69 (0.49-0.98)	4.4	0.036
FXYD4	0.19	1.2 (1-1.4)	4.4	0.036
KNTC1	0.33	1.4 (1-1.9)	4.4	0.036
LOC339290	0.36	1.4 (1-2)	4.4	0.036
MEX3B	-0.22	0.8 (0.65-0.99)	4.4	0.036
NLGN1	0.2	1.2 (1-1.5)	4.4	0.036
OR3A4	-8100	0 (0-6.1e-227)	4.4	0.036
PFKFB1	0.28	1.3 (1-1.7)	4.4	0.036
PHF23	0.58	1.8 (1-3)	4.4	0.036
PITPNM1	-0.33	0.72 (0.53-0.98)	4.4	0.036
PRKAA1	0.35	1.4 (1-2)	4.4	0.036
RNF151	0.98	2.7 (1.1-6.7)	4.4	0.036
SLC30A3	0.2	1.2 (1-1.5)	4.4	0.036
SRP14	0.57	1.8 (1-3)	4.4	0.036
SYN1	0.16	1.2 (1-1.4)	4.4	0.036
TNFRSF11B	-0.16	0.85 (0.73-0.99)	4.4	0.036
ASCC1	0.51	1.7 (1-2.7)	4.4	0.037
C4orf31	-0.14	0.87 (0.77-0.99)	4.4	0.037
DPEP3	0.38	1.5 (1-2.1)	4.3	0.037
FGF22	1.9	6.6 (1.1-39)	4.4	0.037
GORASP2	-0.85	0.43 (0.19-0.95)	4.3	0.037
GPR37	-0.13	0.88 (0.78-0.99)	4.4	0.037
GRN	-0.32	0.72 (0.53-0.98)	4.4	0.037
KIF3B	-0.42	0.65 (0.44-0.98)	4.3	0.037
LSAMP	-0.18	0.84 (0.71-0.99)	4.4	0.037
PRH2	0.26	1.3 (1-1.7)	4.3	0.037
RNF219	0.34	1.4 (1-1.9)	4.3	0.037
RTKN2	0.27	1.3 (1-1.7)	4.3	0.037
SH2D6	0.21	1.2 (1-1.5)	4.4	0.037
TMCO3	-0.32	0.73 (0.54-0.98)	4.4	0.037
VCY	0.24	1.3 (1-1.6)	4.4	0.037
ZC3HAV1L	-0.24	0.78 (0.62-0.99)	4.3	0.037
ART1	-9000	0 (0-3.1e-226)	4.3	0.038
C14orf162	0.68	2 (1-3.7)	4.3	0.038
CELF5	-0.13	0.88 (0.78-0.99)	4.3	0.038
COPS3	0.41	1.5 (1-2.2)	4.3	0.038
CSDAP1	0.42	1.5 (1-2.2)	4.3	0.038
CSNK1D	-0.59	0.55 (0.32-0.97)	4.3	0.038
DNAJC9	0.52	1.7 (1-2.7)	4.3	0.038
EPGN	1.7	5.7 (1.1-30)	4.3	0.038
ERH	0.42	1.5 (1-2.3)	4.3	0.038
EXOSC1	0.56	1.8 (1-3)	4.3	0.038
IRX4	0.27	1.3 (1-1.7)	4.3	0.038
KGFLP2	0.23	1.3 (1-1.5)	4.3	0.038
MDM4	0.36	1.4 (1-2)	4.3	0.038
PYGB	-0.19	0.83 (0.69-0.99)	4.3	0.038
QRICH1	-0.76	0.47 (0.23-0.96)	4.3	0.038
SCOC	0.26	1.3 (1-1.7)	4.3	0.038
TACR3	3.7	40 (1.2-1300)	4.3	0.038
TRAP1	-0.4	0.67 (0.46-0.98)	4.3	0.038
C19orf55	-0.38	0.69 (0.48-0.98)	4.3	0.039
CNGB3	0.17	1.2 (1-1.4)	4.3	0.039
CNNM4	-0.39	0.68 (0.47-0.98)	4.2	0.039
CYB561D2	-0.37	0.69 (0.49-0.98)	4.3	0.039
IYD	-0.15	0.86 (0.75-0.99)	4.2	0.039
KIAA1009	0.32	1.4 (1-1.9)	4.2	0.039
KRTAP5_4	-0.4	0.67 (0.45-0.98)	4.3	0.039
LEPROT	-0.27	0.76 (0.59-0.99)	4.3	0.039
LOC100128573	0.28	1.3 (1-1.7)	4.3	0.039
PAPD7	0.62	1.9 (1-3.3)	4.2	0.039
POU3F2	0.31	1.4 (1-1.8)	4.2	0.039
PRKAG3	2.6	13 (1.1-150)	4.2	0.039
PSPC1	0.53	1.7 (1-2.8)	4.3	0.039
RABGAP1	0.44	1.6 (1-2.4)	4.3	0.039
SPANXB2	0.23	1.3 (1-1.6)	4.3	0.039
STK40	-0.46	0.63 (0.41-0.98)	4.2	0.039
TMEM194B	0.35	1.4 (1-2)	4.3	0.039
TMPRSS11A	-7800	0 (0-1.6e-176)	4.3	0.039
ZFP42	0.18	1.2 (1-1.4)	4.2	0.039
ZNF595	0.15	1.2 (1-1.4)	4.2	0.039
AXIN1	-0.36	0.7 (0.5-0.98)	4.2	0.04
C8orf77	0.18	1.2 (1-1.4)	4.2	0.04
DPY19L2P4	0.68	2 (1-3.8)	4.2	0.04
GATAD2B	0.49	1.6 (1-2.6)	4.2	0.04
HIST2H2BE	0.19	1.2 (1-1.5)	4.2	0.04
KIAA1257	-0.18	0.84 (0.71-0.99)	4.2	0.04
KIN	0.43	1.5 (1-2.3)	4.2	0.04
MED29	-0.65	0.52 (0.28-0.97)	4.2	0.04
NVL	0.52	1.7 (1-2.8)	4.2	0.04
PRSS12	-0.21	0.81 (0.66-0.99)	4.2	0.04
PWRN1	3.7	39 (1.2-1300)	4.2	0.04
RASGRF2	0.2	1.2 (1-1.5)	4.2	0.04
RGP1	-0.39	0.67 (0.46-0.98)	4.2	0.04
RGS2	0.18	1.2 (1-1.4)	4.2	0.04
RINL	-0.28	0.76 (0.58-0.99)	4.2	0.04
SLC12A8	-0.48	0.62 (0.39-0.98)	4.2	0.04
ST3GAL4	-0.18	0.84 (0.71-0.99)	4.2	0.04
UST	0.14	1.1 (1-1.3)	4.2	0.04
ZNF33B	0.43	1.5 (1-2.3)	4.2	0.04
BSDC1	-0.63	0.53 (0.29-0.97)	4.2	0.041
C21orf58	0.27	1.3 (1-1.7)	4.2	0.041
CCNY	0.62	1.9 (1-3.4)	4.2	0.041
DDX50	0.58	1.8 (1-3.1)	4.2	0.041
DOPEY2	-0.46	0.63 (0.4-0.98)	4.2	0.041
FAM103A1	0.44	1.5 (1-2.3)	4.2	0.041
FAM164C	0.33	1.4 (1-1.9)	4.2	0.041
IFT140	-0.37	0.69 (0.49-0.98)	4.2	0.041
KCNJ8	0.21	1.2 (1-1.5)	4.2	0.041
KIAA0753	0.46	1.6 (1-2.5)	4.2	0.041
KIAA1161	-0.33	0.72 (0.52-0.99)	4.2	0.041
MED18	-0.47	0.63 (0.4-0.98)	4.2	0.041
NARFL	-0.48	0.62 (0.39-0.98)	4.2	0.041
OR2T27	-7700	0 (0-7.7e-140)	4.2	0.041
PLAC1	0.13	1.1 (1-1.3)	4.2	0.041
POU1F1	0.64	1.9 (1-3.5)	4.2	0.041
TNFRSF11A	-0.18	0.84 (0.71-0.99)	4.2	0.041
TRPM5	0.14	1.2 (1-1.3)	4.2	0.041
ZNF720	0.44	1.5 (1-2.3)	4.2	0.041
C12orf4	0.32	1.4 (1-1.9)	4.2	0.042
C12orf40	-8000	0 (0-1.1e-123)	4.1	0.042
C18orf21	0.37	1.5 (1-2.1)	4.1	0.042
CXADR	-0.23	0.8 (0.64-0.99)	4.1	0.042
DKK1	0.089	1.1 (1-1.2)	4.1	0.042
FZD8	-0.23	0.8 (0.64-0.99)	4.2	0.042
GAGE2D	0.25	1.3 (1-1.6)	4.1	0.042
GDA	0.19	1.2 (1-1.4)	4.2	0.042
GDAP2	0.45	1.6 (1-2.4)	4.2	0.042
LOC93432	-0.12	0.89 (0.79-1)	4.1	0.042
MID2	0.19	1.2 (1-1.5)	4.1	0.042
MUC20	0.21	1.2 (1-1.5)	4.1	0.042
PARP3	-0.35	0.71 (0.5-0.99)	4.1	0.042
PI4KA	-0.42	0.66 (0.44-0.98)	4.2	0.042
SFRS2B	0.71	2 (1-4)	4.1	0.042
SIDT1	-0.19	0.83 (0.69-0.99)	4.1	0.042
SREBF2	-0.4	0.67 (0.45-0.98)	4.2	0.042
TAL2	0.37	1.4 (1-2)	4.1	0.042
TIPIN	0.32	1.4 (1-1.9)	4.1	0.042
TMEM8A	-0.35	0.7 (0.5-0.99)	4.1	0.042
YBX2	0.23	1.3 (1-1.6)	4.1	0.042
ANKRD42	0.45	1.6 (1-2.4)	4.1	0.043
CCDC102B	0.19	1.2 (1-1.5)	4.1	0.043
CCDC82	0.3	1.3 (1-1.8)	4.1	0.043
LBX2	0.22	1.2 (1-1.5)	4.1	0.043
NUP107	0.46	1.6 (1-2.5)	4.1	0.043
PLEKHM2	-0.46	0.63 (0.4-0.99)	4.1	0.043
RIMBP3	-0.19	0.83 (0.69-0.99)	4.1	0.043
SCARNA7	0.45	1.6 (1-2.4)	4.1	0.043
SKA3	0.31	1.4 (1-1.8)	4.1	0.043
STRN3	0.42	1.5 (1-2.3)	4.1	0.043
TFF1	-0.11	0.9 (0.81-1)	4.1	0.043
TIMM9	0.32	1.4 (1-1.9)	4.1	0.043
ZNF594	0.21	1.2 (1-1.5)	4.1	0.043
ZWINT	0.41	1.5 (1-2.2)	4.1	0.043
ACTR8	-0.61	0.54 (0.3-0.98)	4.1	0.044
ALDOB	-0.09	0.91 (0.84-1)	4.1	0.044
C20orf185	-7900	0 (0-6.8e-100)	4.1	0.044
C7orf61	0.23	1.3 (1-1.6)	4	0.044
EIF3K	-0.46	0.63 (0.4-0.99)	4	0.044
EME2	-0.19	0.82 (0.68-0.99)	4.1	0.044
FRMD8	-0.54	0.59 (0.35-0.98)	4.1	0.044
HMGN3	0.31	1.4 (1-1.9)	4	0.044
HPGD	0.14	1.2 (1-1.3)	4	0.044
IFT80	0.35	1.4 (1-2)	4	0.044
KIAA1586	0.26	1.3 (1-1.7)	4.1	0.044
LOC144438	0.4	1.5 (1-2.2)	4	0.044
MAGEA2	0.076	1.1 (1-1.2)	4.1	0.044
NMUR1	-0.21	0.81 (0.66-0.99)	4	0.044
SAP30L	-0.61	0.55 (0.3-0.98)	4.1	0.044
SPANXN3	0.57	1.8 (1-3.1)	4	0.044
ST6GALNAC4	-0.26	0.77 (0.6-0.99)	4.1	0.044
ALDH2	-0.37	0.69 (0.48-0.99)	4	0.045
C12orf45	0.32	1.4 (1-1.9)	4	0.045
C18orf45	0.39	1.5 (1-2.2)	4	0.045
DCP1A	-0.49	0.62 (0.38-0.99)	4	0.045
ESYT1	-0.52	0.59 (0.36-0.99)	4	0.045
GGCT	0.35	1.4 (1-2)	4	0.045
MASTL	0.37	1.4 (1-2.1)	4	0.045
NASP	0.38	1.5 (1-2.1)	4	0.045
PKN3	0.27	1.3 (1-1.7)	4	0.045
PNLIPRP1	0.43	1.5 (1-2.4)	4	0.045
PTPRF	-0.32	0.72 (0.53-0.99)	4	0.045
RABAC1	-0.33	0.72 (0.52-0.99)	4	0.045
SMCHD1	0.27	1.3 (1-1.7)	4	0.045
SNORA61	-1.4	0.26 (0.067-0.97)	4	0.045
TMC7	-0.26	0.77 (0.6-0.99)	4	0.045
TSPY2	0.33	1.4 (1-1.9)	4	0.045
XPA	0.5	1.6 (1-2.7)	4	0.045
ZNF480	0.28	1.3 (1-1.7)	4	0.045
AQP4	0.33	1.4 (1-1.9)	4	0.046
CHIC1	0.36	1.4 (1-2)	4	0.046
DCUN1D3	0.42	1.5 (1-2.3)	4	0.046
KLHL36	-0.37	0.69 (0.48-0.99)	4	0.046
LOC441208	-0.36	0.7 (0.49-0.99)	4	0.046
LSM6	0.41	1.5 (1-2.2)	4	0.046
NBEA	0.13	1.1 (1-1.3)	4	0.046
UPK3B	0.18	1.2 (1-1.4)	4	0.046
VENTX	0.086	1.1 (1-1.2)	4	0.046
ACO2	-0.42	0.66 (0.43-1)	3.9	0.047
AHCTF1	0.41	1.5 (1-2.3)	4	0.047
C16orf73	1.5	4.7 (1-21)	3.9	0.047
CDKN1C	0.19	1.2 (1-1.5)	4	0.047
CECR2	0.11	1.1 (1-1.2)	3.9	0.047
CLPTM1	-0.49	0.61 (0.37-0.99)	3.9	0.047
CRYGA	1.8	5.9 (1-34)	4	0.047
EHBP1	0.38	1.5 (1-2.1)	3.9	0.047
ENAM	0.22	1.2 (1-1.5)	3.9	0.047
GLT25D1	-0.52	0.6 (0.36-0.99)	4	0.047
LLPH	0.5	1.7 (1-2.7)	3.9	0.047
LOC100240726	0.33	1.4 (1-1.9)	4	0.047
LOC390595	-0.3	0.74 (0.55-1)	3.9	0.047
MAP4K5	0.39	1.5 (1-2.2)	3.9	0.047
NUCKS1	0.36	1.4 (1-2.1)	4	0.047
PIGG	-0.47	0.62 (0.39-0.99)	3.9	0.047
RPF2	0.3	1.3 (1-1.8)	3.9	0.047
SLC45A3	-0.22	0.8 (0.64-1)	4	0.047
SMC1B	0.15	1.2 (1-1.4)	3.9	0.047
SNAPC3	0.47	1.6 (1-2.5)	4	0.047
SNX17	-0.63	0.53 (0.28-0.99)	3.9	0.047
SUMO1P3	0.4	1.5 (1-2.2)	3.9	0.047
SYNGR3	-0.18	0.84 (0.7-1)	3.9	0.047
TMEM98	-0.27	0.76 (0.58-1)	3.9	0.047
UNC45A	-0.4	0.67 (0.45-1)	3.9	0.047
BARHL1	0.5	1.6 (1-2.7)	3.9	0.048
C17orf58	-0.35	0.7 (0.49-1)	3.9	0.048
CACYBP	0.41	1.5 (1-2.3)	3.9	0.048
EPAS1	-0.36	0.7 (0.49-1)	3.9	0.048
FAM18B	0.35	1.4 (1-2)	3.9	0.048
GTSF1L	1.5	4.6 (1-21)	3.9	0.048
HSBP1L1	0.29	1.3 (1-1.8)	3.9	0.048
IGDCC3	0.16	1.2 (1-1.4)	3.9	0.048
IMMP1L	0.35	1.4 (1-2)	3.9	0.048
KIRREL2	0.17	1.2 (1-1.4)	3.9	0.048
MAP3K8	0.26	1.3 (1-1.7)	3.9	0.048
MND1	0.26	1.3 (1-1.7)	3.9	0.048
MTA3	0.59	1.8 (1-3.3)	3.9	0.048
MYD88	-0.53	0.59 (0.35-1)	3.9	0.048
MYF6	1.8	6.1 (1-37)	3.9	0.048
NCRNA00230B	0.37	1.4 (1-2.1)	3.9	0.048
PBX2	0.42	1.5 (1-2.3)	3.9	0.048
PPP1R15B	0.46	1.6 (1-2.5)	3.9	0.048
PTGR2	0.28	1.3 (1-1.7)	3.9	0.048
SLC35D1	-0.31	0.73 (0.53-1)	3.9	0.048
SLITRK1	0.32	1.4 (1-1.9)	3.9	0.048
SPRR2E	0.19	1.2 (1-1.5)	3.9	0.048
STK10	-0.46	0.63 (0.4-1)	3.9	0.048
YWHAE	0.5	1.6 (1-2.7)	3.9	0.048
ZNF271	0.38	1.5 (1-2.2)	3.9	0.048
ZNF394	0.48	1.6 (1-2.6)	3.9	0.048
ZNF577	0.17	1.2 (1-1.4)	3.9	0.048
ZNF662	0.12	1.1 (1-1.3)	3.9	0.048
ACAD8	-0.55	0.58 (0.33-1)	3.9	0.049
ACTN2	0.27	1.3 (1-1.7)	3.9	0.049
AQPEP	0.21	1.2 (1-1.5)	3.9	0.049
CBWD3	0.28	1.3 (1-1.7)	3.9	0.049
CELF4	0.15	1.2 (1-1.3)	3.9	0.049
CENPP	0.34	1.4 (1-2)	3.9	0.049
CYP2S1	-0.21	0.81 (0.66-1)	3.9	0.049
DPP4	0.14	1.1 (1-1.3)	3.9	0.049
F2RL1	-0.29	0.75 (0.56-1)	3.9	0.049
FXR2	0.53	1.7 (1-2.9)	3.9	0.049
G2E3	0.28	1.3 (1-1.8)	3.9	0.049
HDDC2	0.42	1.5 (1-2.3)	3.9	0.049
LASS5	0.51	1.7 (1-2.8)	3.9	0.049
LOC100303728	0.27	1.3 (1-1.7)	3.9	0.049
MTPAP	0.41	1.5 (1-2.3)	3.9	0.049
MUM1	-0.48	0.62 (0.38-1)	3.9	0.049
PRPSAP1	-0.6	0.55 (0.3-1)	3.9	0.049
RAD51L1	0.33	1.4 (1-1.9)	3.9	0.049
SLC16A11	0.16	1.2 (1-1.4)	3.9	0.049
SLC22A6	-7700	0 (0-4.6e-22)	3.9	0.049
SLC6A6	-0.24	0.79 (0.62-1)	3.9	0.049
SNRPE	0.38	1.5 (1-2.1)	3.9	0.049
ZMYM2	0.33	1.4 (1-1.9)	3.9	0.049
ZNF319	-0.41	0.66 (0.44-1)	3.9	0.049
AHCY	-0.28	0.75 (0.57-1)	3.8	0.05
AVEN	0.41	1.5 (1-2.3)	3.8	0.05
C5orf25	-0.48	0.62 (0.38-1)	3.8	0.05
C9orf103	0.3	1.3 (1-1.8)	3.8	0.05
C9orf129	-0.31	0.73 (0.54-1)	3.8	0.05
CCDC21	-0.41	0.67 (0.44-1)	3.9	0.05
CCL27	0.71	2 (1-4.2)	3.8	0.05
CDK6	0.28	1.3 (1-1.7)	3.8	0.05
GPR153	-0.21	0.81 (0.66-1)	3.8	0.05
KCNIP2	0.19	1.2 (1-1.5)	3.8	0.05
LGALS9B	-0.13	0.88 (0.77-1)	3.8	0.05
LRRC41	-0.57	0.57 (0.32-1)	3.8	0.05
MLLT4	-0.32	0.72 (0.52-1)	3.8	0.05
MON1B	-0.49	0.61 (0.38-1)	3.8	0.05
PLEKHG4	-0.2	0.82 (0.66-1)	3.8	0.05
PMS2L4	0.34	1.4 (1-2)	3.8	0.05
RBM17	0.62	1.9 (1-3.5)	3.8	0.05
SNW1	0.45	1.6 (1-2.5)	3.8	0.05
TFCP2L1	-0.14	0.87 (0.75-1)	3.8	0.05
TMEM27	0.18	1.2 (1-1.4)	3.8	0.05
TOMM20L	0.53	1.7 (1-2.9)	3.8	0.05
ZNF23	0.45	1.6 (1-2.5)	3.8	0.05

## Sheet: Advanced_consensus
x
LOC642826
ID4
KLHL29
PPP1R1C
PDPK1
LOC652276
CEACAM5
TRPC4AP
PRKAR2A
C12orf5
CCL24
PRIC285
SPESP1
CACNA1D
RASEF
NANOS1
TIGD1
C5orf34
IL20RB
MFHAS1
ARID5B
FAM72B
RAB11FIP3
ATP13A2
SAA1
ATP2C2
BRIX1
MYO1D
ZNF248
OSBPL3
JRKL
FAM18B2
FHL2
FAM167A
UCA1
CABLES2
CUEDC1
AKAP1
SAA2
C1orf105
SULF2
KIAA0141
WIPI1
PCOLCE2
C12orf32
HCG4P6
FANCL
LRFN3
XCL1
DNAJC22
TGFBI
ASPHD2
WDR31
ALPP
FAM72A
GALNT10
EFCAB10
NDC80
TRAPPC6B
PARP2
PLAUR
C15orf23
CHGB
GRB14
C17orf67
PROCA1
CYFIP2
NLN
C22orf27
ZNF26
KIAA1244
FAM72D
MTERF
DAPL1
PROM2
C20orf134
NCRNA00183
PLS3
CYBA
RAB23
MGAT4B
ODAM
HJURP
PRG4
SLCO4A1
AVL9
BMS1P5
C10orf58
FAM178A
FKBP4
ADCY9
ATP6V1B1
CCDC58
CCDC90A
CHMP4A
MATN2
PIN4
RBP7
RPS6KA1
ST18
WNT5A
AKR1C1
ART5
C6orf52
CC2D2A
COX16
FLJ37201
LOC100302401
SPDYE1
FAM89A
FLJ35776
GLT25D2
GOLT1A
GSTM3
KCNMB3
SLFN13
TAS2R20
UCHL5
ALDH1A1
C9orf37
DERL2
MAGOHB
METTL10
PELP1
SNRPD1
TMEM81
HRASLS5
PNN
PRDM5
ABHD12B
C10orf82
C3orf39
C5orf51
CHKA
FANCM
GPR157
IGF2BP1
PRPF39
RTN4RL2
TFPI
TROVE2
ANP32E
BGLAP
C1QL3
C21orf29
KLC4
KLHL32
LOC344595
LOC84740
MAOB
SLC22A5
SPDYE8P
STC2
TMED8
C3orf55
MTRR
C6orf27
CCDC50
ENTPD6
GLRX2
KLF15
NCRNA00201
NUDT13
NXPH4
OTUB2
PAX6
PID1
RICTOR
RPAIN
SAMD10
SHH
ZNF808
ZSWIM5
C16orf91
FKBP3
GRINL1A
NRCAM
TKT
ZNF141
CABLES1
KLHL23
MARCKS
MSI2
PELI1
PLA2G10
PSCA
RIMKLA
SLC44A4
THOC1
TRMT6
TTN
USMG5
ZNF37B
ZNF385B
ACTG1
BNIP3
C5orf22
CISH
ERGIC3
MCM8
MICAL2
PKD1L1
PKHD1
RAD51AP1
RNF19B
RUNDC2A
STX8
TBC1D16
ZFP36L2
ACSS2
BNIP2
CA3
CDADC1
CDKN3
COX6C
EIF5B
IL7
OCLN
OTUD7A
PAFAH1B3
SURF2
TRIM67
CBFA2T2
CHDH
DNAJA3
HM13
NMU
RALGAPA2
TMEM139
AGAP7
ASPM
CBX5
EDEM2
ELP2P
FKBP9L
KBTBD7
LARS2
LITAF
MOSC1
MRPL47
PARK2
PFDN6
PMS2L5
RAB15
SPDYC
TTC22
WDR72
C15orf63
GABRB2
GPR20
NDNL2
SERPINI1
SLC16A10
SLC5A1
CETN3
GNA11
GTF2F2
LOC407835
MNAT1
NCOA6
RPS24
SNAPC1
SYP
ANKRD26
C10orf4
C17orf101
CORO7
EFHC2
FABP4
H2AFY2
HS6ST1
LOC100286844
MTHFS
NICN1
PHYHIPL
PORCN
SAMD5
SLC6A12
SRI
SSBP1
C20orf11
CHRNB1
CX3CL1
FUT6
KIAA0195
NUP155
TMEM60
ZNF286B
ZNF83
DKFZP686I15217
DLEU2
FXYD3
HTR7P1
MDM2
OGDHL
PHGDH
TMEM8B
XRCC2
CSPG5
FAM84A
LOC100134713
MGLL
NFAT5
POMZP3
RNASEK
RRP15
STAG3L4
ZDHHC8
BACE2
C1orf31
CHORDC1
CUTC
FAM3C
GFER
ITGB1BP2
PCDH1
RAD52
UCKL1
ABCA2
CD99
MGC21881
NEB
PMEPA1
SCGN
UNC5B
ZNF789
CCRN4L
CDK1
COQ10A
DKFZP586I1420
HSF2
JPH3
L3MBTL3
LOC728758
PIH1D2
RAB40C
RPP30
RYR3
SCUBE1
ZNF530
ZNF680
ARVCF
AURKC
C7orf53
CLC
DTX3
FAM119B
LUC7L3
SMTNL2
TCP10L
TNFAIP8L3
ZNF213
ZNF519
ABCC4
DTL
FAM76B
KIAA0101
KIAA1467
LDLR
PAIP1
PDGFA
PLD4
POU4F1
PSMC3IP
SGMS1
TTC13
ZNF738
ABCG2
ADCY3
C14orf156
C1orf56
CCDC48
CCDC84
CEACAM6
CECR5
DGKB
DNAJC5
KNTC1
LOC339290
MEX3B
PITPNM1
PRKAA1
SYN1
TNFRSF11B
C4orf31
GPR37
GRN
KIF3B
LSAMP
PRH2
RNF219
RTKN2
TMCO3
ZC3HAV1L
CELF5
COPS3
ERH
KGFLP2
MDM4
PYGB
SCOC
C19orf55
CNNM4
CYB561D2
IYD
KIAA1009
LEPROT
RABGAP1
STK40
TMEM194B
ZNF595
AXIN1
C8orf77
HIST2H2BE
KIAA1257
PRSS12
RASGRF2
RGP1
RGS2
RINL
ST3GAL4
UST
ZNF33B
C21orf58
FAM103A1
FAM164C
IFT140
KCNJ8
KIAA1161
MED18
PLAC1
TNFRSF11A
TRPM5
C12orf4
C18orf21
CXADR
DKK1
FZD8
GDA
LOC93432
MID2
MUC20
PARP3
PI4KA
SIDT1
SREBF2
TIPIN
TMEM8A
YBX2
CCDC102B
CCDC82
LBX2
RIMBP3
SKA3
STRN3
TFF1
TIMM9
ZNF594
ZWINT
ALDOB
EME2
HMGN3
HPGD
KIAA1586
NMUR1
ST6GALNAC4
ALDH2
C12orf45
C18orf45
GGCT
MASTL
NASP
PKN3
PTPRF
RABAC1
SMCHD1
TMC7
ZNF480
CHIC1
DCUN1D3
LOC441208
LSM6
NBEA
UPK3B
VENTX
CDKN1C
CECR2
EHBP1
LOC390595
NUCKS1
RPF2
SLC45A3
SNAPC3
SYNGR3
TMEM98
C17orf58
EPAS1
FAM18B
HSBP1L1
IMMP1L
MAP3K8
MND1
PTGR2
SLC35D1
STK10
ZNF271
ZNF577
ZNF662
CBWD3
CENPP
CYP2S1
DPP4
F2RL1
G2E3
HDDC2
LOC100303728
MTPAP
RAD51L1
SLC16A11
SLC6A6
ZMYM2
AHCY
C9orf103
C9orf129
CCDC21
CDK6
GPR153
KCNIP2
LGALS9B
PLEKHG4
PMS2L4
TFCP2L1
TMEM27

## Sheet: Advanced_classifier
	importance
ACSS2	0.00352196
ADCY9	0.00623386
ARID5B	0.00185103
ATP13A2	0.00138611
AXIN1	0.00205752
BRIX1	0.00727508
CC2D2A	0.00639613
CCDC102B	0.00165835
CCDC50	0.00280022
CCDC58	0.00226489
CDK1	0.0148411
CNNM4	0.00253947
CYB561D2	0.00132262
DNAJC5	0.00208041
DTX3	0.00345856
EHBP1	0.00488976
FABP4	0.00214629
FANCL	0.00327773
FKBP3	0.00289945
FZD8	0.00241954
G2E3	0.00328751
GGCT	0.00179928
GNA11	0.0020332
GRN	0.00641261
HSF2	0.00169228
KCNJ8	0.00554348
KLHL29	0.00346333
KNTC1	0.00247329
L3MBTL3	0.00183053
LSAMP	0.0061754
MASTL	0.0040862
MID2	0.00367975
MNAT1	0.00179206
MND1	0.00213625
MRPL47	0.00470362
MTPAP	0.00762753
NDC80	0.00653728
PAIP1	0.00204972
PCDH1	0.00136133
PRPF39	0.004875
RAB40C	0.00416825
RAD51AP1	0.00528539
RBP7	0.00364805
RGS2	0.00284181
SAMD10	0.00218662
SULF2	0.00233678
THOC1	0.00484107
TNFAIP8L3	0.00305361
TTC22	0.00204152
UNC5B	0.0040861
