# Supplementary material for: SSCS: A Stage Supervised Subtyping System for Colorectal Cancer
Source: Biomedicines. 2021 Dec 2;9(12):1815. doi: 10.3390/biomedicines9121815 (PMC8698601; doi:10.3390/biomedicines9121815)
Supplement: Supplementary file 1 [file biomedicines-09-01815-s001.zip › TableS6.xlsx]

## Sheet: TableS6
Table S6. 103 dysregulated gene sets between the five SSCS subtypes
	SSCS1_TCGA	SSCS1_CPTAC	SSCS1_GEO	SSCS2_TCGA	SSCS2_CPTAC	SSCS2_GEO	SSCS3_TCGA	SSCS3_CPTAC	SSCS3_GEO	SSCS4_TCGA	SSCS4_CPTAC	SSCS4_GEO	SSCS5_TCGA	SSCS5_CPTAC	SSCS5_GEO
WATANABE_COLON_CANCER_MSI_VS_MSS_DN	-3	-3	-3	3	3	3	0.155262	-3	-3	0.209715	0.715547	-3	3	3	3
REACTOME_GLUCURONIDATION	-2.18209	-3	-0.0457527	3	2.77371	1.61122	0.0291837	1.82053	-0.187247	-1.8824	1.33212	-1.08013	0.214229	-2.74187	0.426595
BARRIER_CANCER_RELAPSE_TUMOR_SAMPLE_UP	-1.17623	-2.67109	-0.839862	3	2.4999	1.09311	3	3	2.72517	-0.877096	-2.93832	-0.0187569	-2.68664	-2.41961	-2.88636
GO_2_IRON_2_SULFUR_CLUSTER_BINDING	-0.462735	-2.19263	-0.203273	3	2.94738	1.44452	0.365372	0.773503	0.0323678	-0.781097	-0.930628	-0.984096	-0.123707	-1.75031	0.0979046
SEIDEN_MET_SIGNALING	-0.839321	-1.40805	-2.75198	3	1.93315	2.73509	1.10331	1.08868	2.06078	-0.380896	-0.618632	-0.669647	-1.02952	-1.72893	-1.84061
GO_TRNA_5_LEADER_REMOVAL	-0.337148	-1.29758	-1.22373	1.64484	1.24057	1.18909	1.45973	2.07995	1.98987	-2.25565	-2.15034	-1.68156	-0.149826	-1.02677	-0.606372
GO_RIBONUCLEASE_P_ACTIVITY	-0.290459	-1.21562	-1.00842	1.57749	1.20536	1.06484	1.32833	1.95975	1.88723	-3	-2.25342	-1.62231	0.000317151	-1.01618	-0.595577
WENG_POR_TARGETS_GLOBAL_UP	-1.21429	-1.11179	-0.31298	1.84388	3	1.77614	0.200749	-0.000965206	-0.0661231	-2.38543	-1.17587	-3	3	-1.7685	1.28378
WP_CHOLESTEROL_BIOSYNTHESIS_PATHWAY	-0.813241	-0.947268	-0.481157	0.944392	3	1.77523	0.506765	0.0019631	1.7399	-2.3767	-2.51241	-2.51278	1.89442	-2.41072	-0.836183
REACTOME_DEPOSITION_OF_NEW_CENPA_CONTAINING_NUCLEOSOMES_AT_THE_CENTROMERE	-1.2857	-0.765584	-3	3	3	3	3	3	3	-2.88786	-3	-3	-1.66573	-3	-1.15345
REACTOME_PROCESSING_AND_ACTIVATION_OF_SUMO	-0.944316	-0.558965	-1.3434	1.98405	0.660966	1.18129	2.31821	0.629542	1.05606	-0.282379	-0.710144	-0.459195	-1.06894	-0.392202	-0.90101
GO_MHC_CLASS_II_PROTEIN_COMPLEX	3	-0.543725	3	-1.45542	-0.769883	-2.98063	-3	2.60474	-1.95055	0.981882	-0.285201	2.73088	-0.833807	-0.332118	-1.62547
GO_CHROMATIN_REMODELING_AT_CENTROMERE	-0.634999	-0.505818	-3	3	3	3	3	3	3	-3	-3	-3	-1.09292	-3	-3
GO_PRENYLTRANSFERASE_ACTIVITY	-0.219805	-0.413143	-0.95841	2.58034	1.05189	1.54406	1.04695	0.530119	1.19203	-1.94382	-0.667117	-1.05558	-0.258904	-0.786323	-0.664321
IWANAGA_E2F1_TARGETS_INDUCED_BY_SERUM	-1.19771	-0.412704	-2.9364	3	2.32529	3	3	1.45808	3	-0.592643	-0.532673	-1.76185	-2.27027	-1.93787	-3
GO_MHC_PROTEIN_COMPLEX	3	-0.377755	3	-1.92216	-0.352891	-3	-3	3	-2.35151	0.904831	0.216146	3	-0.456665	-0.786031	-1.40661
GO_CUL4A_RING_E3_UBIQUITIN_LIGASE_COMPLEX	-0.594654	-0.347734	-1.41559	1.45604	1.02993	1.06336	1.2913	0.0741724	0.757956	-0.417187	-0.0273252	-0.575445	-0.607057	-0.388808	-0.785395
GO_CENTROMERE_COMPLEX_ASSEMBLY	-0.835677	-0.310327	-3	3	2.24951	3	3	3	3	-3	-3	-3	-1.32036	-3	-3
FARMER_BREAST_CANCER_CLUSTER_2	-2.006	-0.264737	-3	3	3	3	3	3	3	-3	-3	-3	-3	-3	-3
REACTOME_PD_1_SIGNALING	3	-0.262951	3	-1.09624	-0.992508	-2.5487	-3	3	-1.60797	0.743547	-0.291469	2.3814	-2.27837	-1.14083	-1.77175
HP_ABNORMAL_PERISTALSIS	0.412525	-0.258124	1.305	-0.959398	-0.432386	-2.48354	-0.870536	0.287712	-1.3186	3	2.37922	2.81189	-0.119615	0.0354293	-0.814316
LUI_THYROID_CANCER_CLUSTER_4	2.89076	-0.228148	3	-1.79272	-1.3641	-3	-3	0.511774	-3	0.997273	0.902292	3	-0.449112	0.367847	-0.291205
REACTOME_CHK1_CHK2_CDS1_MEDIATED_INACTIVATION_OF_CYCLIN_B_CDK1_COMPLEX	-1.09258	-0.215162	-1.51111	3	1.18449	2.38732	2.21607	2.15169	2.73032	-2.3605	-2.32196	-2.55606	-0.54283	-1.31225	-1.7727
GO_PEPTIDYL_METHIONINE_MODIFICATION	-0.575576	-0.209377	-0.907946	1.01119	0.211648	2.06131	2.26523	0	1.1377	-0.0921911	-0.798466	-0.880447	-0.223575	-0.0127495	-0.763614
BIOCARTA_AKAP95_PATHWAY	-0.50314	-0.201411	-0.268089	2.83589	0.315586	0.767029	0.757981	1.16147	1.03181	-0.537557	-0.714893	-0.577558	-0.775286	-0.677471	-0.692825
GO_REGULATION_OF_HELICASE_ACTIVITY	-0.399724	-0.186039	-0.928449	1.45301	0.34238	0.3214	1.44477	1.59242	2.19217	-0.060321	-0.673644	-0.128287	-0.479516	-0.621166	-1.44306
FINETTI_BREAST_CANCERS_KINOME_GRAY	-1.2037	-0.181985	-1.73196	3	0.185	1.59484	3	0.000256309	2.06037	0	0.476423	-0.12218	-2.59078	-0.589071	-2.79048
KAMMINGA_EZH2_TARGETS	-1.61789	-0.111624	-3	3	1.85783	3	3	3	3	-3	-3	-3	-2.25172	-2.71155	-3
GO_POSITIVE_REGULATION_OF_NUCLEOTIDE_BIOSYNTHETIC_PROCESS	0	-0.0916115	0.525347	-0.133146	0.996367	0.129596	-1.44452	0.0235491	-1.87504	0	-0.203495	-0.248652	1.43799	-0.635862	0.444422
BIOCARTA_PTC1_PATHWAY	-0.799724	-0.082589	-2.58303	3	0.0778457	2.74795	1.75387	1.57421	3	-1.49196	-1.38093	-1.99783	-0.456366	-0.263213	-1.52392
REACTOME_GENERATION_OF_SECOND_MESSENGER_MOLECULES	3	-0.0397909	3	-1.1205	-1.8014	-3	-3	2.41017	-3	1.71048	0.894456	3	-1.49099	-0.888267	-0.674957
GO_MHC_CLASS_II_PROTEIN_COMPLEX_BINDING	3	-0.0184985	2.15381	-0.0636119	-0.0201695	-2.44624	-1.92343	2.43188	-0.732031	0.254738	1.06107	1.45451	-0.403788	-0.791935	-0.843088
ZHAN_MULTIPLE_MYELOMA_PR_UP	-1.46815	-0.0164008	-3	3	2.33584	3	3	3	3	-3	-3	-3	-2.60163	-3	-3
REACTOME_ESTABLISHMENT_OF_SISTER_CHROMATID_COHESION	-0.570054	-0.00483884	-2.17554	1.40978	0.44927	2.74422	2.51127	0.138717	3	-0.448965	-1.05506	-0.990379	-1.65486	-0.997618	-1.77142
ODONNELL_TARGETS_OF_MYC_AND_TFRC_DN	-1.7032	-0.0039877	-3	3	2.02787	3	3	3	3	-3	-3	-3	-2.09123	-3	-3
GO_REGULATION_OF_ATTACHMENT_OF_SPINDLE_MICROTUBULES_TO_KINETOCHORE	-0.114198	-0.00312948	-1.19686	1.87972	0.245751	1.60737	1.26196	1.3471	2.77492	-1.24253	-2.72774	-2.6184	-0.542906	-1.18489	-1.44556
KEGG_STEROID_BIOSYNTHESIS	-1.33708	-0.00232098	-1.14768	1.57148	1.40404	3	0.222849	-0.511915	0.099764	-0.832446	-1.06426	-0.977902	1.83818	0.0519442	0.0487548
BIOCARTA_TCRA_PATHWAY	3	-0.000721528	3	-0.627585	-0.863026	-2.4321	-3	1.43398	-3	0.723952	1.79239	1.97556	-1.28619	-1.8349	-0.959714
REACTOME_E2F_MEDIATED_REGULATION_OF_DNA_REPLICATION	-1.02674	-0.000404082	-3	2.69516	1.0967	3	3	1.05588	3	-2.3906	-3	-3	-0.306942	-1.18514	-1.82295
FINETTI_BREAST_CANCER_KINOME_RED	-1.20277	-9.98992e-05	-3	3	1.12811	3	3	3	3	-3	-3	-3	-2.7399	-2.88636	-3
GO_KINETOCHORE_ASSEMBLY	-0.371713	0	-2.76236	1.59592	0.515586	3	3	1.46265	3	-3	-3	-3	-0.585194	-3	-3
GO_MHC_PROTEIN_COMPLEX_BINDING	3	0	3	-0.136737	-0.166445	-3	-2.62178	2.50742	-0.894456	0.246946	1.13915	1.88686	-0.775674	-1.43845	-0.912077
HP_PRIMARY_PERITONEAL_CARCINOMA	-0.475682	0	-3	2.65024	0.772679	3	1.75629	0.565479	3	-1.57217	-1.55785	-1.36145	-0.457112	-0.800437	-3
BARRIER_CANCER_RELAPSE_NORMAL_SAMPLE_DN	1.34951	3	0.0907275	-3	-3	-0.678526	-0.561426	-3	-0.822608	0	-0.0659108	0.00770723	3	3	1.82886
NIKOLSKY_BREAST_CANCER_7P22_AMPLICON	0.641551	3	0.0453475	-3	-1.65156	-0.394911	-0.660012	-1.17517	0.0151937	0.363743	-2.93592	-0.142939	3	2.72324	1.80766
WP_MIRNA_TARGETS_IN_ECM_AND_MEMBRANE_RECEPTORS	3	3	3	-3	-3	-3	-3	-1.91332	-3	3	3	3	-1.73443	3	-3
GO_COMPLEX_OF_COLLAGEN_TRIMERS	1.61836	3	3	-2.52471	-3	-3	-3	-0.891367	-1.724	3	3	3	-0.556925	3	-2.20402
GO_PLATELET_DERIVED_GROWTH_FACTOR_BINDING	0.984096	3	2.68607	-1.95125	-3	-3	-2.16303	-1.48242	-1.49804	1.58246	3	3	-0.0181723	2.75863	-0.807098
JIANG_TIP30_TARGETS_DN	0.749922	2.4674	0.897292	-2.57733	-2.51493	-0.527331	-1.16459	-1.87759	-1.09104	0.050732	0.0584985	0.034375	3	2.66484	1.15908
CLASPER_LYMPHATIC_VESSELS_DURING_METASTASIS_DN	3	2.43422	3	-3	-3	-3	-3	-0.399234	-3	3	3	3	-2.04047	3	-3
NIKOLSKY_BREAST_CANCER_16P13_AMPLICON	3	2.38693	1.87546	-3	-2.08923	-0.918905	-1.38212	-0.191573	-3	-1.04937	-3	-0.946729	3	1.12742	3
NIKOLSKY_BREAST_CANCER_16Q24_AMPLICON	0.182931	2.21124	-0.0310643	-1.96778	-0.764573	0.0103811	0.0197057	-1.29582	0.14966	-0.19382	-0.306722	-2.29073	3	0.62683	3
HP_ULNAR_BOWING	1.44692	2.11296	1.6783	-1.4747	-3	-2.48419	-1.85752	-0.267076	-0.974203	1.55675	0.443734	1.76797	-0.151521	1.36465	-0.0759586
REACTOME_SCAVENGING_BY_CLASS_A_RECEPTORS	1.72476	1.95758	3	-3	-3	-3	-3	0.105579	-1.71075	3	3	3	-0.403524	1.29823	-1.41665
ANASTASSIOU_MULTICANCER_INVASIVENESS_SIGNATURE	3	1.91382	3	-3	-3	-3	-3	0.799998	-3	3	3	3	-3	3	-3
KANG_FLUOROURACIL_RESISTANCE_DN	1.74473	1.86771	1.04801	-1.65201	-1.06087	-0.247015	-0.444519	-0.760726	-0.633783	-0.385398	-0.455982	-0.245774	2.17828	0.772345	0.501317
GO_FIBRILLAR_COLLAGEN_TRIMER	2.08142	1.86053	3	-3	-3	-3	-2.69572	-0.749604	-1.01359	3	3	3	-0.533741	2.75701	-1.80802
CHANG_POU5F1_TARGETS_UP	1.4633	1.75122	1.64971	-2.26054	-3	-2.69291	-1.45557	-0.449906	-0.784125	3	1.90118	3	-0.823157	1.24874	-1.38685
HP_FIBULAR_HYPOPLASIA	0.310363	1.72469	1.26324	-1.29583	-1.74644	-0.829416	-1.35243	-1.63831	-0.405044	3	0.749409	0.919301	-0.841728	2.06898	-0.389446
GO_NEGATIVE_REGULATION_OF_CYTOKINE_PRODUCTION_INVOLVED_IN_IMMUNE_RESPONSE	3	1.54118	3	-1.44079	-1.78034	-2.70843	-2.66326	0.598755	-1.27885	1.09788	2.77027	3	-0.431575	-0.421647	-0.759601
FARMER_BREAST_CANCER_CLUSTER_4	3	1.47472	3	-3	-3	-3	-3	0.0586824	-3	3	3	3	-3	2.94241	-3
HP_SHOULDER_DISLOCATION	0.946345	1.38508	1.33169	-1.05303	-2.88015	-1.56029	-1.11923	-0.0422922	-1.33044	1.58011	2.53453	1.58009	-0.123222	1.25977	-0.39378
GRATIAS_RETINOBLASTOMA_16Q24	0.0100654	1.18245	-0.000382347	-0.822406	-0.776478	-0.0381425	-0.386973	-0.446105	-0.443215	0	-0.00833099	-0.0974152	2.65474	0.372081	3
WATANABE_COLON_CANCER_MSI_VS_MSS_UP	3	1.15597	3	-2.92863	-1.91485	-3	-0.0069034	3	1.87667	-0.916175	-0.0172992	0.229804	-2.68816	-1.38031	-1.34221
NIKOLSKY_BREAST_CANCER_12Q24_AMPLICON	1.29459	1.08958	-0.00253498	-1.05494	-1.1757	0.28398	-0.1771	-0.508863	0.152736	-0.101357	-0.945349	-1.11872	1.99675	1.46913	0.0708366
GO_REGULATION_OF_NEUTROPHIL_ACTIVATION	3	0.995421	2.07447	-1.93004	-1.39253	-1.55947	-2.82042	0.466241	-1.60977	0.530531	0.767258	0.958134	0.0422347	-0.0520666	0.0765643
BIOCARTA_CTL_PATHWAY	3	0.896538	1.75945	-0.191357	-1.03747	-0.496427	-2.78979	2.55502	-1.8173	0.0515381	0.710656	0.930147	-1.047	-2.09617	-0.706085
BIOCARTA_GRANULOCYTES_PATHWAY	3	0.87309	3	-1.28851	-1.48501	-2.7952	-1.65588	1.58501	-0.808493	0.665808	1.72886	3	-0.994648	-0.0692801	-1.53404
THUM_MIR21_TARGETS_HEART_DISEASE_UP	3	0.709854	3	-3	-3	-3	-3	0.387969	-3	3	3	3	-2.19989	3	-2.88934
WP_CORI_CYCLE	0.865695	0.701103	0.780913	-0.445075	-0.10445	-3.04017e-05	-0.5887	0.0472318	0.298104	-1.12409	-0.919157	-0.349411	2.59862	-0.0121283	-0.583093
BIOCARTA_TCYTOTOXIC_PATHWAY	2.60522	0.600222	2.67129	-0.599445	-1.12794	-2.16661	-3	1.92515	-2.99114	0.828508	2.14585	2.12205	-1.33897	-2.0935	-0.0356979
JI_CARCINOGENESIS_BY_KRAS_AND_STK11_DN	3	0.587187	3	-3	-3	-3	-3	0.124424	-2.9709	3	3	3	-2.2678	1.59412	-1.7971
BIOCARTA_THELPER_PATHWAY	2.62142	0.503998	2.92238	-0.488919	-1.53952	-2.16376	-3	1.51945	-2.99004	0.924161	2.30859	2.13257	-1.33228	-1.3877	-0.103893
NIKOLSKY_BREAST_CANCER_20Q11_AMPLICON	-1.21421	0.473984	-3	-0.0543197	-0.132214	3	-1.53481	-2.31068	-1.89932	0.543983	-1.21334	-1.93297	3	1.83283	3
BIOCARTA_BLYMPHOCYTE_PATHWAY	3	0.456615	3	-2.77812	-1.58173	-3	-3	2.30303	-2.94723	1.62126	1.47709	2.9677	-0.976748	-1.27687	-1.43081
NIKOLSKY_BREAST_CANCER_1Q21_AMPLICON	0.0486965	0.422577	1.02	-0.791424	-0.00644033	-1.10553	-0.0151083	-0.0736215	0.332743	-0.298328	-0.540864	-0.0977088	3	0.0161303	0.995464
GO_PEPTIDE_ANTIGEN_BINDING	3	0.372194	1.57368	-2.0854	-1.19002	-1.58536	-2.66627	0.728367	-0.479608	0.0541377	-0.336563	1.13792	0.0116016	-0.337535	-0.652611
BIOCARTA_NO2IL12_PATHWAY	3	0.357011	2.60072	0	-0.558698	-1.64401	-3	1.04972	-1.86186	-0.196017	0.795094	0.647027	-0.987711	-1.08913	0
SEMBA_FHIT_TARGETS_UP	2.64011	0.343097	0.706306	-2.14683	-1.29132	-1.5903	-0.206091	1.00128	-0.0746363	0.782121	1.20877	1.57909	-0.903542	-0.303137	-1.75058
REACTOME_CONDENSATION_OF_PROPHASE_CHROMOSOMES	-0.801893	0.207896	-2.79849	2.3047	0.0435338	1.12186	3	0.1835	3	-2.26653	-2.99667	-3	-0.929187	-0.495203	0.250387
HOLLERN_ADENOMYOEPITHELIAL_BREAST_TUMOR	1.58825	0.195963	3	-3	-3	-3	-3	-0.14192	-3	3	3	3	-0.798821	3	-0.679563
MATHEW_FANCONI_ANEMIA_GENES	-0.621529	0.195942	-1.36109	2.83989	0.000573647	1.66192	2.30717	0.808353	3	-2.21568	-1.34228	-1.98122	-1.70613	-1.27634	-1.88223
STARK_HYPPOCAMPUS_22Q11_DELETION_DN	1.23523	0.186232	0.146996	-0.887999	0.0207932	0.10455	-1.38709	0.209546	-0.939529	-0.177361	-0.880711	-0.0601564	2.37314	-0.029509	0.0358017
MATZUK_EARLY_ANTRAL_FOLLICLE	0.129555	0.183553	1.37076	-0.585595	-1.69112	-1.16472	-0.460635	-0.0849327	-0.586114	3	1.80989	1.40923	-0.725357	0.393436	-0.789093
GO_PROTEIN_LOCALIZATION_TO_KINETOCHORE	-0.554038	0.172922	-2.87157	1.34202	0.0327985	3	2.46669	1.32467	3	-1.82376	-2.89435	-2.89473	-0.827952	-1.32511	-2.51264
HP_RECURRENT_CANDIDA_INFECTIONS	2.0616	0.169148	0.852757	-0.28013	-0.224783	-0.333286	-2.75053	0.358347	-1.05122	0.214784	0.376875	0.0844683	-0.115431	-0.585545	-0.039553
HP_SHORT_TIBIA	0.0295601	0.13301	0.771497	-0.702918	-0.166681	-0.404824	-1.07399	-0.405851	-0.585194	3	0.180035	0.476605	-0.154945	0.295858	-0.198274
GO_PROTEIN_LOCALIZATION_TO_CHROMOSOME_CENTROMERIC_REGION	-0.826348	0.122473	-3	2.47998	0.0726091	3	3	1.64378	3	-1.93904	-2.86151	-2.9364	-0.65445	-1.6125	-2.49109
CREIGHTON_AKT1_SIGNALING_VIA_MTOR_DN	0.0938536	0.101242	0.224827	-0.190285	0.0156077	0.522879	-0.188184	0.00208963	-0.768964	-2.26821	-3	-1.71345	3	0.041632	1.71162
GO_T_CELL_ACTIVATION_VIA_T_CELL_RECEPTOR_CONTACT_WITH_ANTIGEN_BOUND_TO_MHC_MOLECULE_ON_ANTIGEN_PRESENTING_CELL	1.96067	0.0929274	2.43506	-0.398701	-0.821512	-2.38056	-1.90184	1.16126	-1.915	0.320509	1.04485	1.68558	-0.402075	-0.333716	-0.0576496
REACTOME_GLUCONEOGENESIS	0.356133	0.0667	0.285486	-0.385979	-0.00415867	0.138251	-0.867548	0.18093	-0.155007	-1.09234	-0.508036	-1.31761	3	-0.114548	0.776738
REACTOME_CONDENSATION_OF_PROMETAPHASE_CHROMOSOMES	-0.797757	0.0219565	-2.29381	2.80679	0.0880704	2.99538	2.30557	1.01604	3	-2.10138	-3	-2.75488	-0.935654	-1.37571	-2.54569
GO_KINETOCHORE_ORGANIZATION	-0.579335	0.00898669	-3	3	0.750679	3	3	2.07168	3	-3	-3	-3	-0.890455	-3	-3
MCBRYAN_TERMINAL_END_BUD_UP	0.611455	0.00732721	1.65687	-1.68935	-1.28811	-1.52641	-0.64776	0.0348265	-0.93934	3	3	1.50263	-0.29953	0.736411	-0.746929
GO_NUCLEAR_PORE_ORGANIZATION	-0.576115	0.00719914	-2.76065	1.44997	0.0193831	1.67095	2.33089	0.00450521	3	-0.397669	-0.227862	-1.07002	-0.657696	-0.0652542	-1.83242
REACTOME_TELOMERE_C_STRAND_SYNTHESIS_INITIATION	-0.579137	0.00700932	-0.963052	1.51803	0.175438	0.559784	2.24273	0.0329062	2.18044	-0.122174	-0.281017	-0.442264	-0.533904	-0.199489	-0.333697
WHITFIELD_CELL_CYCLE_LITERATURE	-0.96401	0.00646678	-3	3	1.8464	3	3	3	3	-3	-3	-3	-1.34588	-3	-3
EGUCHI_CELL_CYCLE_RB1_TARGETS	-0.817357	0.00626406	-3	2.97453	1.86006	3	3	3	3	-3	-3	-3	-2.19887	-3	-3
GO_CONDENSED_NUCLEAR_CHROMOSOME_KINETOCHORE	-0.221335	0.00595134	-3	1.23065	0.17471	1.88346	3	1.98022	3	-3	-2.93764	-3	-0.678091	-2.20273	-3
REACTOME_FCGR_ACTIVATION	2.78755	0.0031776	3	-0.295566	-0.968349	-2.4485	-1.05607	0.842664	-2.33475	0.797294	1.52881	2.05685	-1.74569	-0.386211	0.640278
GO_XY_BODY	-0.47796	0.0029939	-0.489763	1.08334	0.171953	1.02435	1.97474	0	0.777674	-0.173142	-0.205526	-0.668633	-0.753846	-0.41357	-0.489321
GO_CONDENSED_CHROMOSOME_OUTER_KINETOCHORE	-0.476995	0.0011916	-2.84869	2.3814	0.289062	3	2.58132	1.59589	3	-3	-2.90108	-3	-0.557191	-1.68567	-3
REACTOME_RECOGNITION_AND_ASSOCIATION_OF_DNA_GLYCOSYLASE_WITH_SITE_CONTAINING_AN_AFFECTED_PURINE	-0.367037	8.68676e-05	-1.05005	0.563154	0.0641553	0.0150903	1.97584	0.232228	1.52375	-0.390363	-0.746395	-1.08666	0.00835756	-0.603121	1.75132
