# Supplementary material for: SSCS: A Stage Supervised Subtyping System for Colorectal Cancer
Source: Biomedicines. 2021 Dec 2;9(12):1815. doi: 10.3390/biomedicines9121815 (PMC8698601; doi:10.3390/biomedicines9121815)
Supplement: Supplementary file 1 [file biomedicines-09-01815-s001.zip › TableS7.xlsx]

## Sheet: OS
Cell Types	beta	HR (95% CI for HR)	wald.test	p.value
Neurons	96	3.1e+41 (1.2e+23-7.5e+59)	20	9.8e-06
naïve B cells	21	1.4e+09 (8.3-2.5e+17)	4.7	0.029
naïve CD4+ T cells	20	3.2e+08 (1.9-5.4e+16)	4.1	0.043

## Sheet: DFS
Cells	beta	HR (95% CI for HR)	wald.test	p.value
Neurons	65	1.5e+28 (6.9e+11-3.4e+44)	11	0.00073
memory CD4+ T cells	-14	1.1e-06 (5.6e-12-0.24)	4.8	0.028
Fibroblasts	4	54 (1.3-2200)	4.4	0.036
cDC	-5.8	0.0031 (1.2e-05-0.79)	4.2	0.041
