# Supplementary figures and images for: SSCS: A Stage Supervised Subtyping System for Colorectal Cancer
Source: MDPI journal article supplement (doi:10.3390/biomedicines9121815), 2021-12-02

a

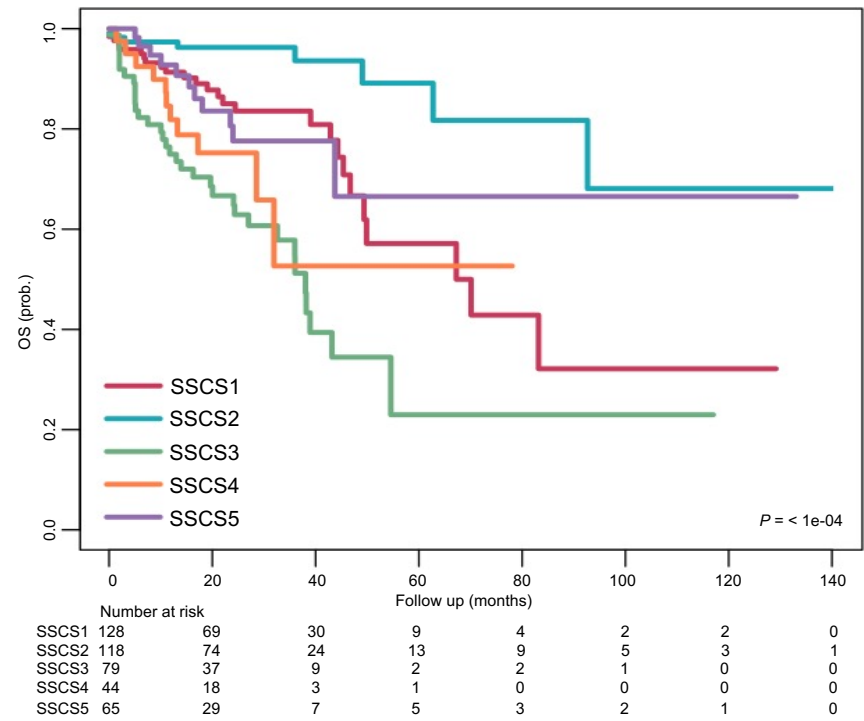

b

|       | SSCS1 | SSCS2                 | SSCS3 | SSCS4 |
|-------|-------|-----------------------|-------|-------|
| SSCS2 | 0.002 | -                     | -     | -     |
| SSCS3 | 0.001 | $6.1 \times 10^{-10}$ | -     | -     |
| SSCS4 | 0.166 | $8.5 \times 10^{-5}$  | 0.289 | -     |
| SSCS5 | 0.871 | 0.013                 | 0.009 | 0.255 |

c

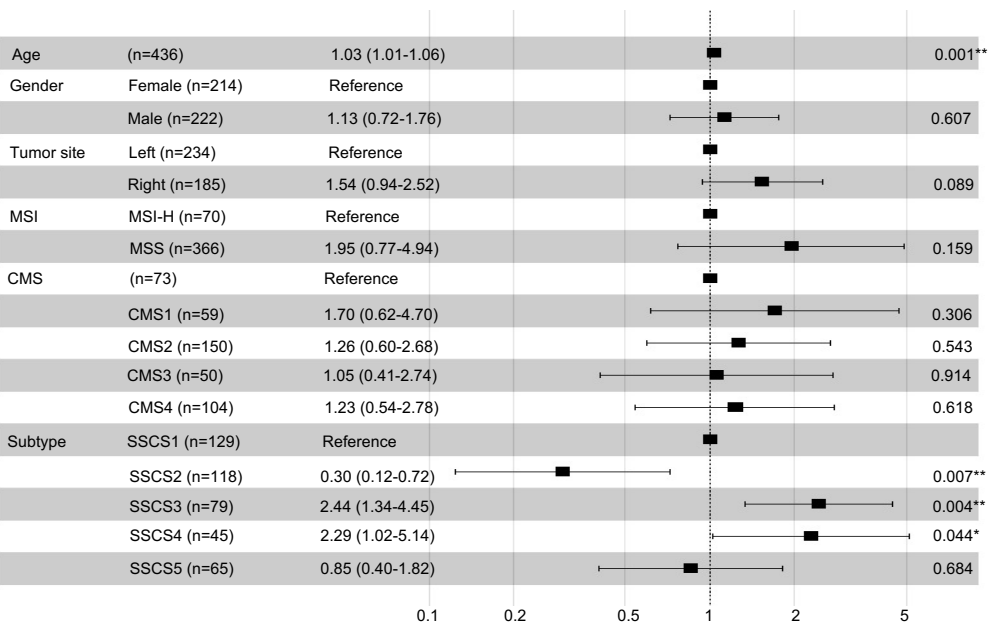

d

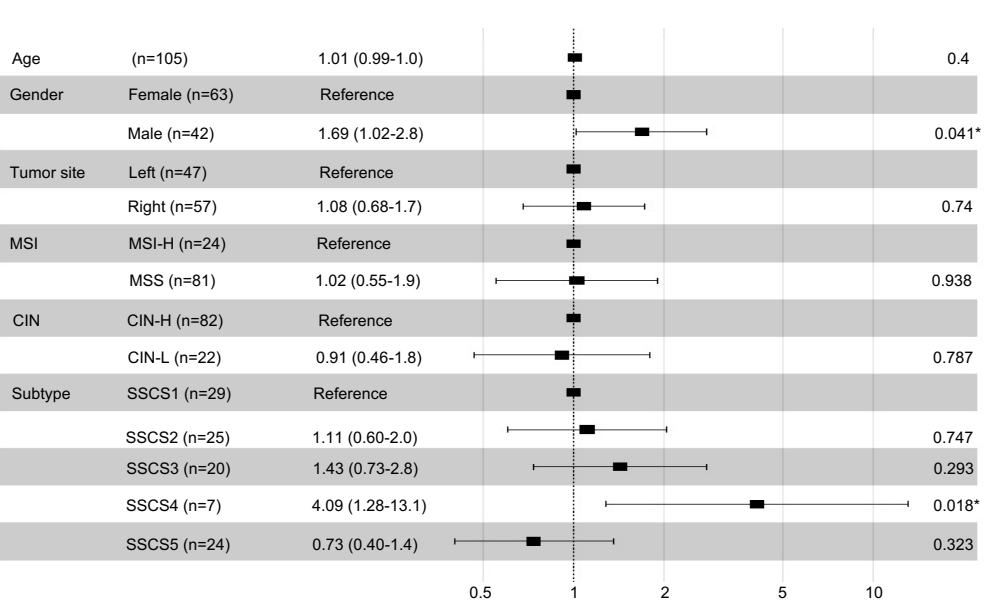

Supplement: s1 [file s1]

a

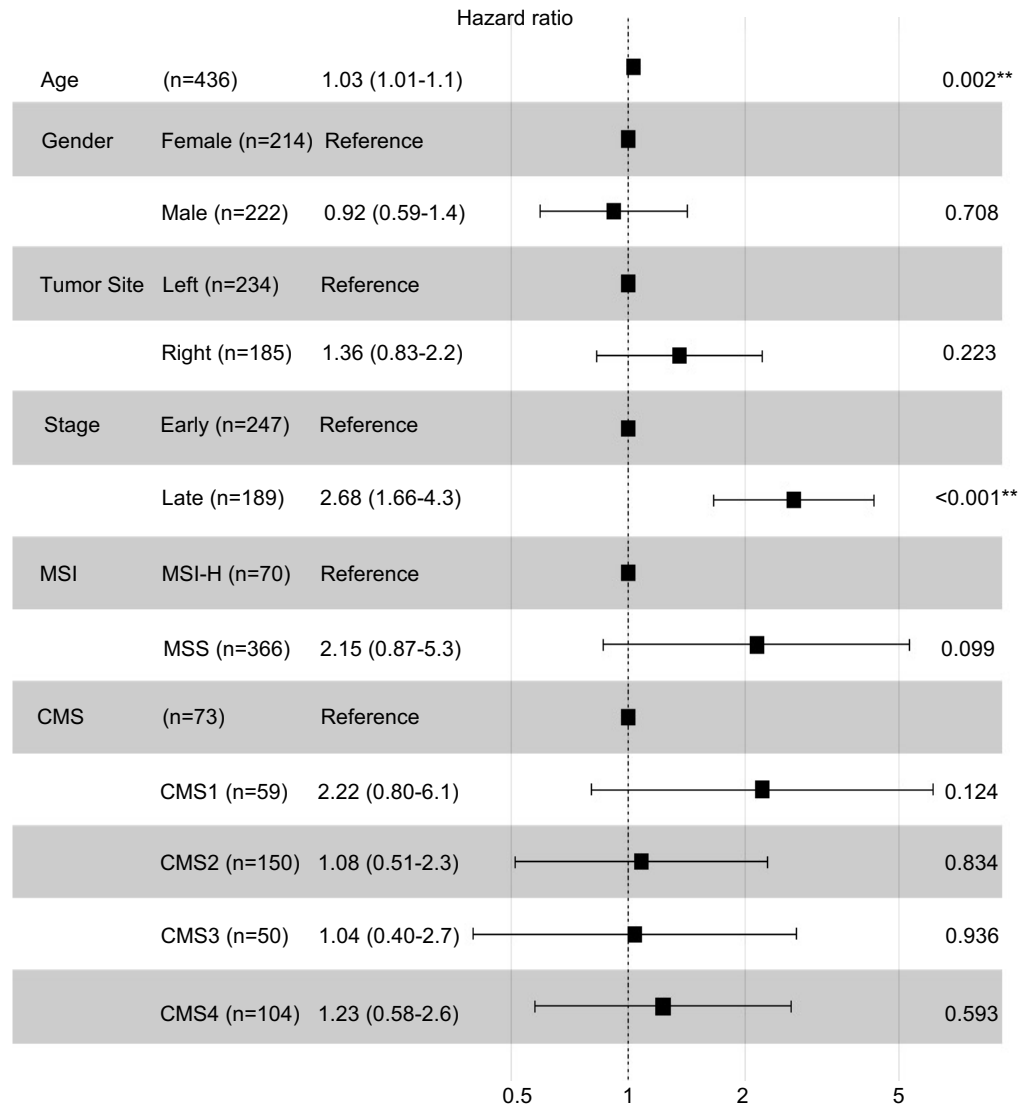

b

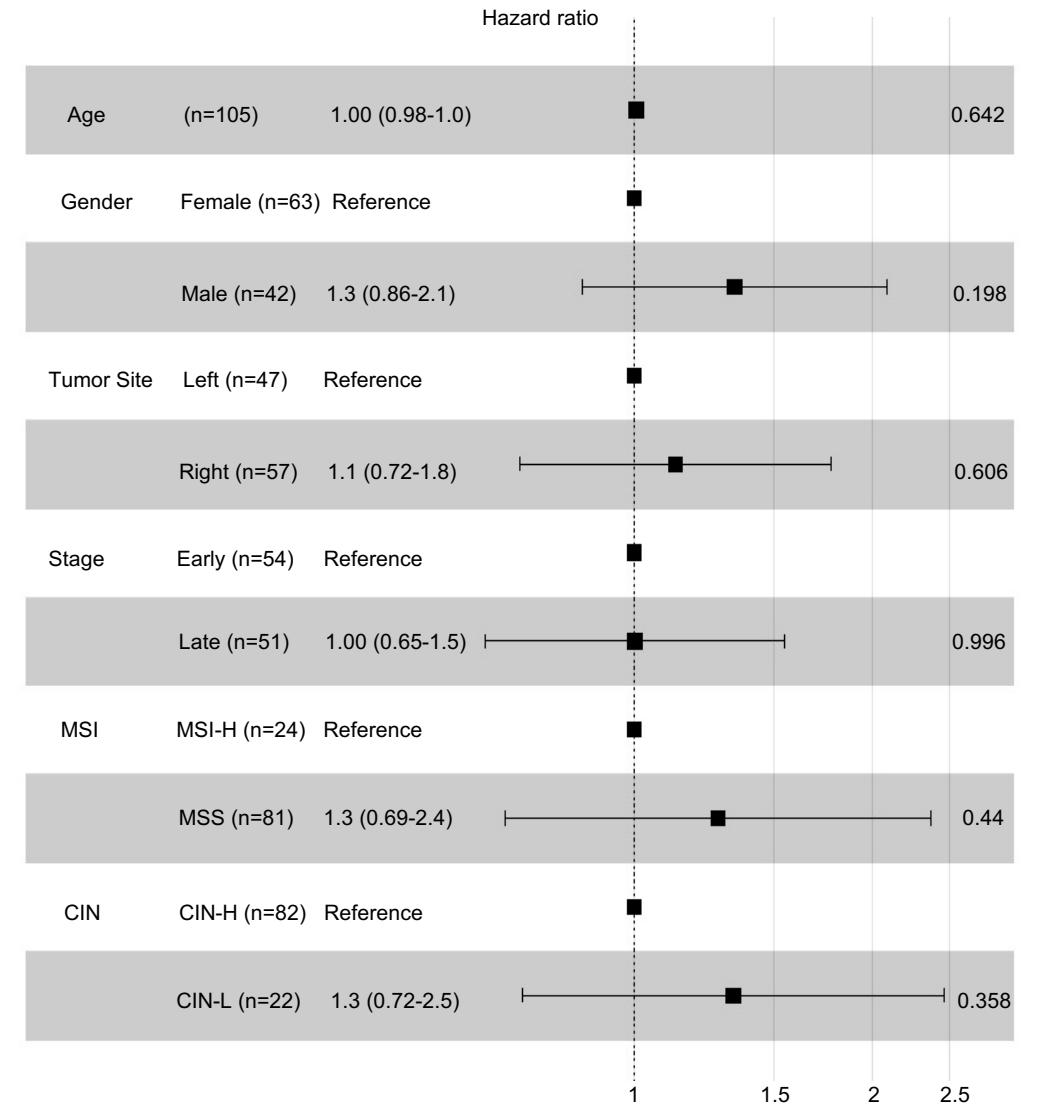

Supplement: s1 [file s1]

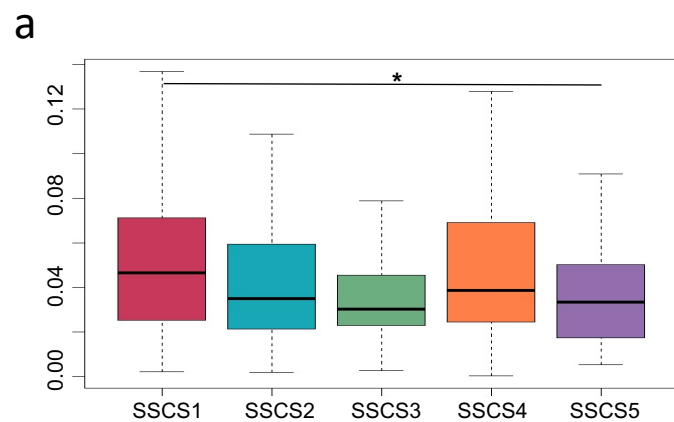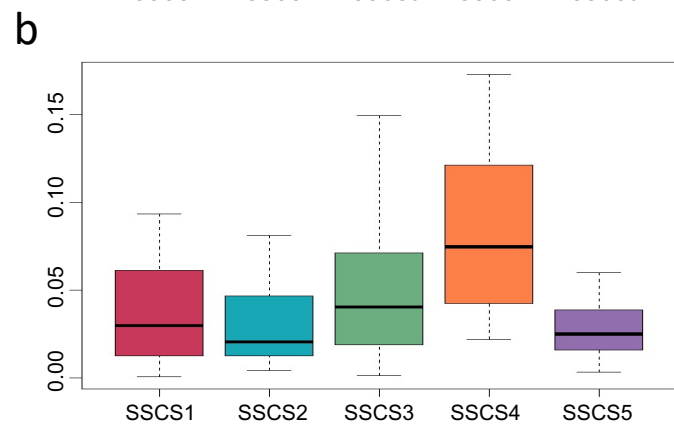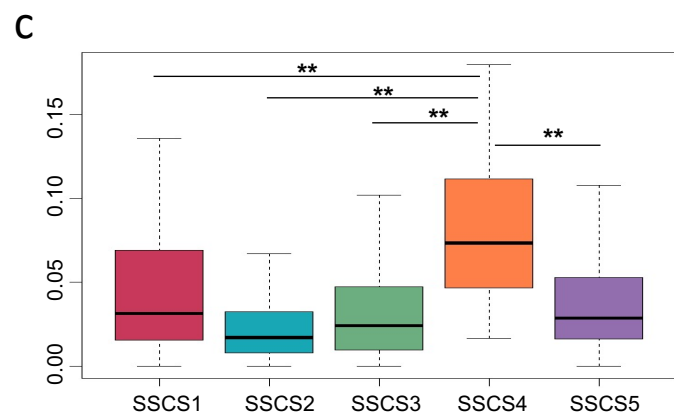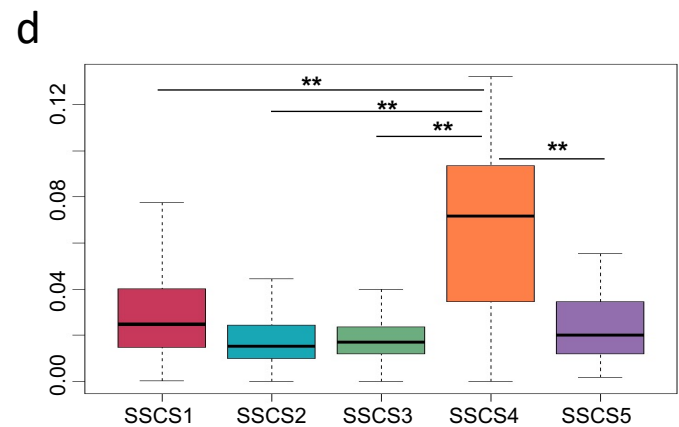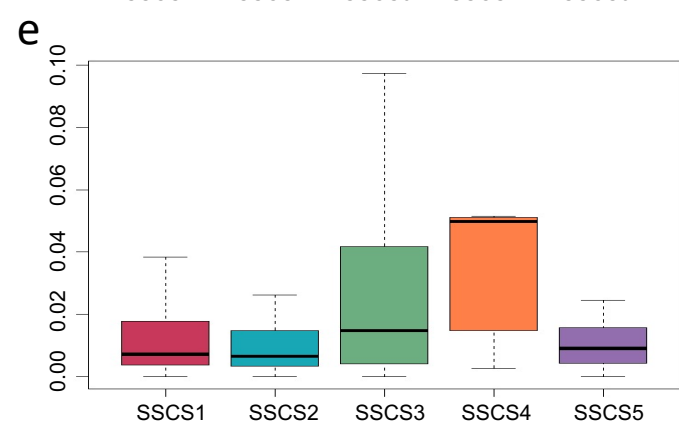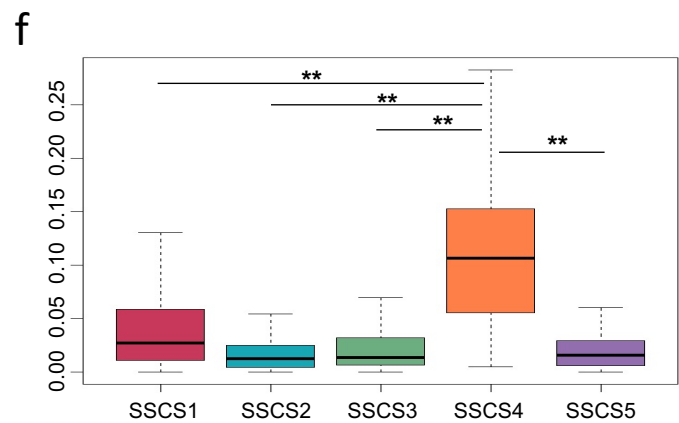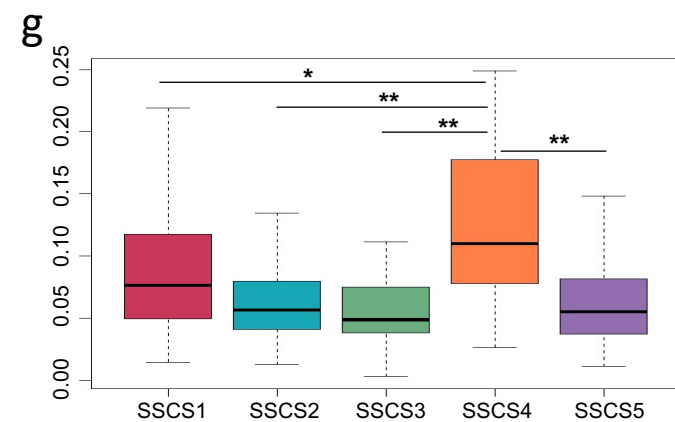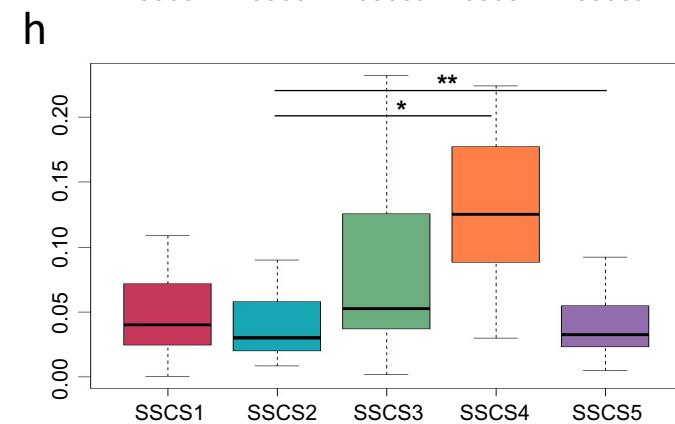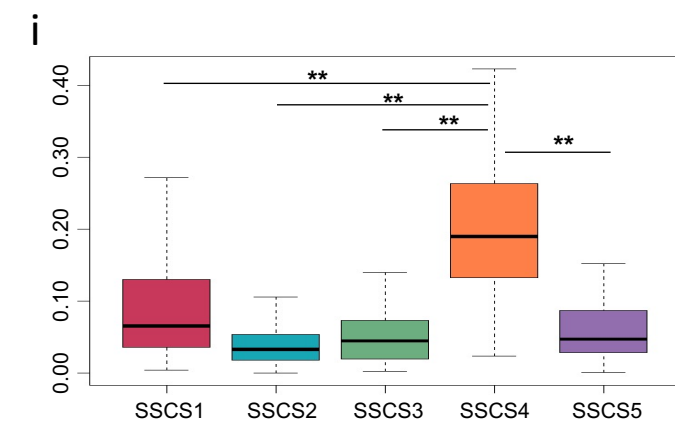

Supplement: s1 [file s1]
